# Supplementary material for: Deep eutectic solvent mediated synthesis of quinazolinones and dihydroquinazolinones: synthesis of natural products and drugs
Source: Royal Society of Chemistry journal article supplement (doi:10.1039/c6ra00855k), 2016-01-01
Supplement: c6ra00855k1.pdf [file c6ra00855k1.pdf]

## SUPPORTING INFORMATION

### Deep eutectic solvent mediated synthesis of quinazolinones and dihydroquinazolinones: synthesis of natural products and drugs

Suman Kr Ghosh, Rajagopal Nagarajan\*

*School of Chemistry, University of Hyderabad, Hyderabad- 500046, India*

*rsc@uohyd.ernet.in*

| <b><u>Table of Contents</u></b>                 | <b><u>Pages</u></b> |
|-------------------------------------------------|---------------------|
| NMR, LCMS, HRMS, CHN Spectra of <b>3a- 3l</b>   | <b>2- 34</b>        |
| NMR, LCMS, HRMS, CHN Spectra of <b>5 – 7</b>    | <b>35- 40</b>       |
| NMR, LCMS, HRMS, CHN Spectra of <b>8a- 8f</b>   | <b>41- 56</b>       |
| NMR, LCMS, HRMS, CHN Spectra of <b>10a-10 f</b> | <b>57- 66</b>       |
| NMR, LCMS, HRMS, CHN Spectra of <b>11a- 12f</b> | <b>67- 96</b>       |

# $^1\text{H}$ , $^{13}\text{C}$ -NMR, HRMS, LCMS & CHN Spectra of compounds 3a- 12f

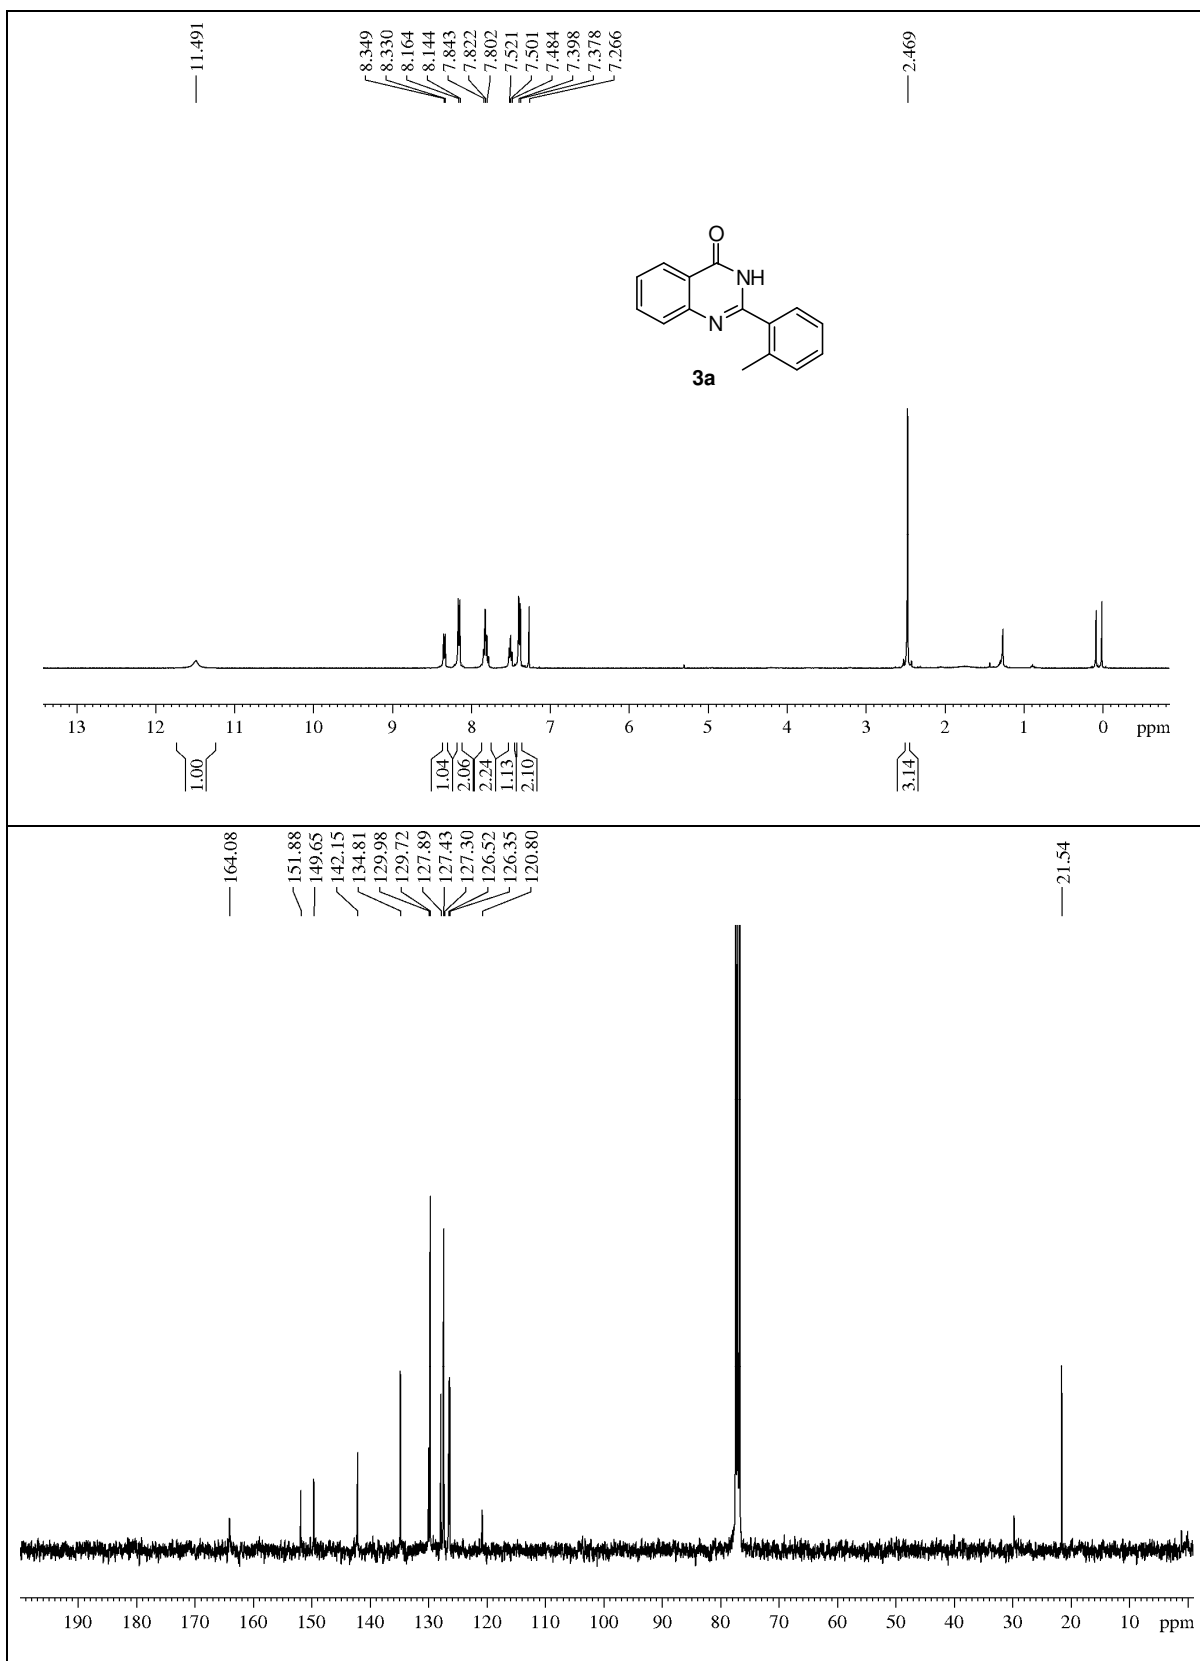

**LCMS-2010A DATA REPORT  
SCHOOL OF CHEMISTRY  
UNIVERSITY OF HYDERABAD**

User : Admin  
 Sample : SKG-608  
 Inj. Volume : 5.000  
 Data Name : C:\LCMSsolution\User\Data\SKG-608-APCI-POS1.qld  
 Method Name : C:\LCMSsolution\User\Method\esi.qlm

MS Spectrum

Line#:1 R.Time:0.758(Scan#:46) Positive  
 MassPeaks:314 BasePeak:237.05(7483766)  
 RawMode:Single 0.758(46)  
 BG\_Mode:Peak Start 0.560(34)

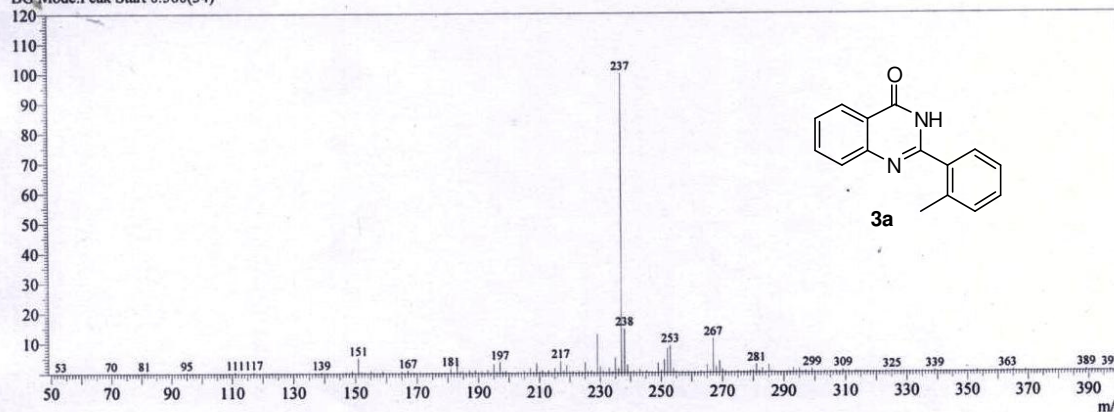

| Peak# | R.Time | I.Time | F.Time | Area      | Height   | A/H   | Mark | %Total | Name | Base m/z | Base Int. |
|-------|--------|--------|--------|-----------|----------|-------|------|--------|------|----------|-----------|
| 1     | 0.758  | 0.560  | 1.043  | 280005070 | 24556967 | 11.40 |      | 100.00 |      | 237.05   | 7483766   |
|       |        |        |        | 280005070 | 24556967 |       |      | 100.00 |      |          |           |

FLASH EA 1112 SERIES CHN REPORT  
SCHOOL OF CHEMISTRY  
UNIVERSITY OF HYDERABAD

Method filename: C:\Program Files\Thermo Finnigan\Eager 300 for EA1112\DATA\Sys\_data\_ex  
Sample ID: SKG-608 (# 142)  
Analysis type: UnkNown  
Chromatogram filename: UNK-18022015-2.dat  
Sample weight: 1.206

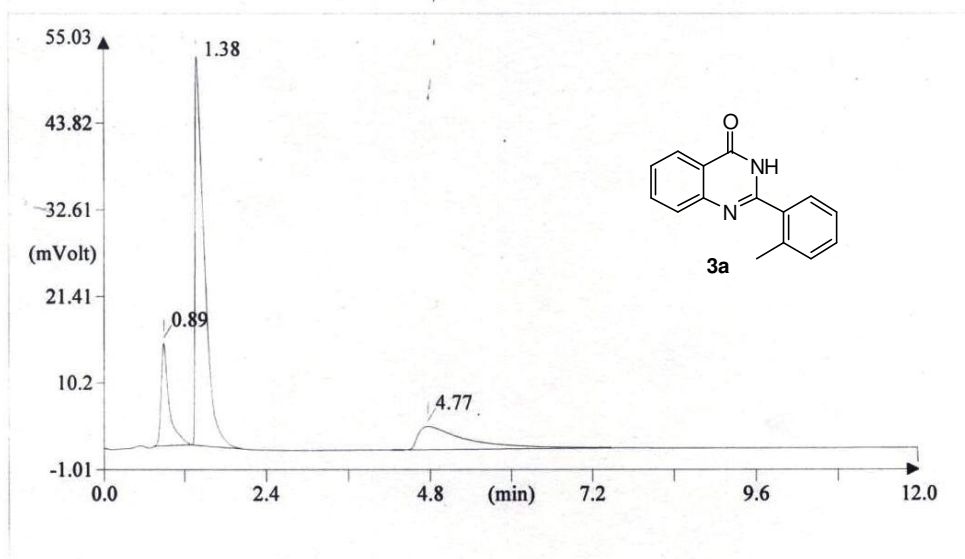

| Element Name | Element % | Ret. Time |
|--------------|-----------|-----------|
| Nitrogen     | 11.96     | 0.89      |
| Carbon       | 76.12     | 1.38      |
| Hydrogen     | 5.18      | 4.77      |



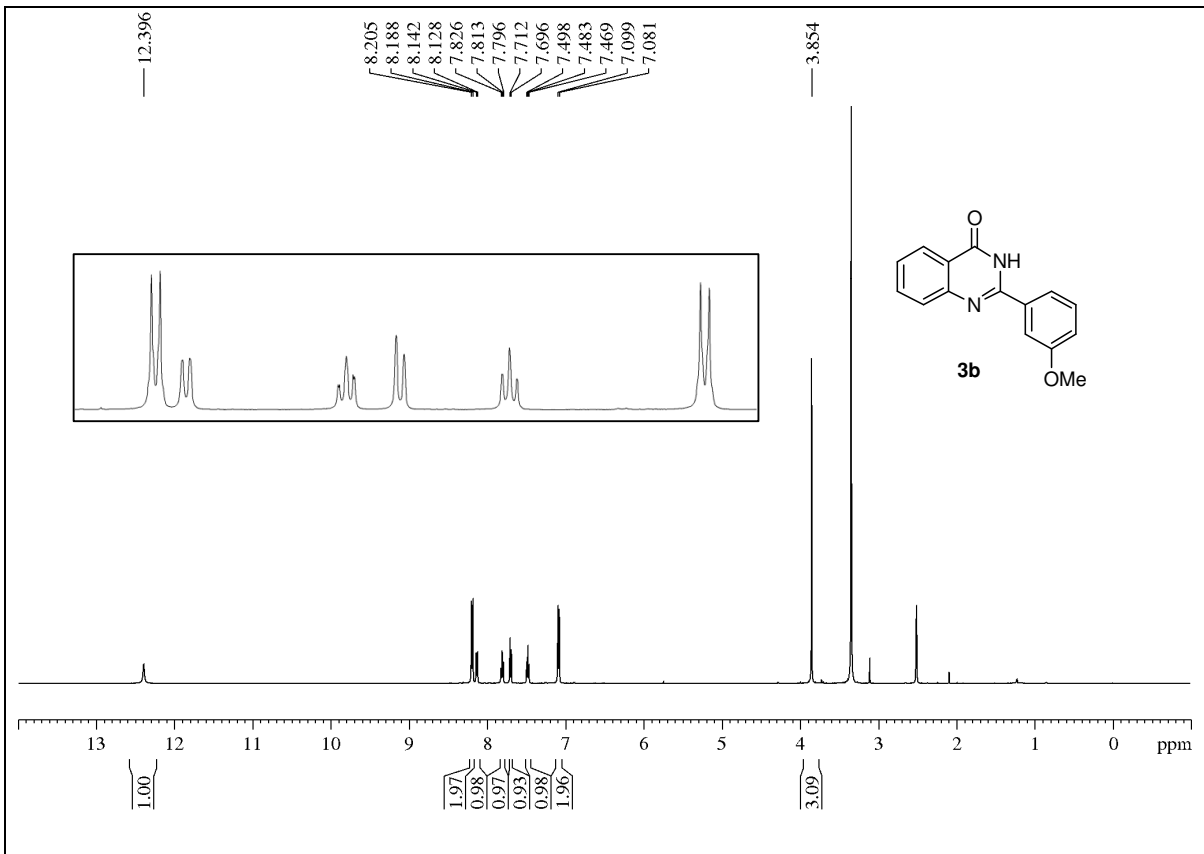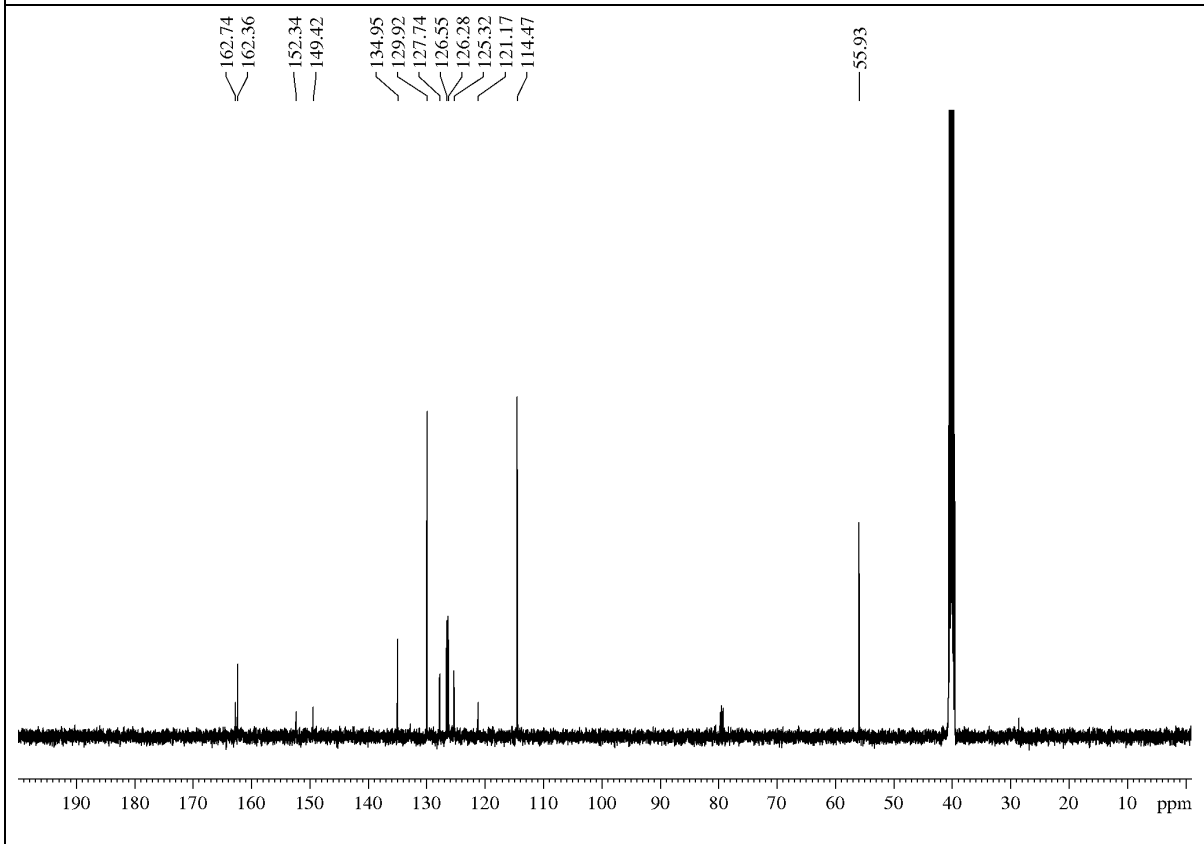

**LCMS-2010A DATA REPORT  
SCHOOL OF CHEMISTRY  
UNIVERSITY OF HYDERABAD**

User : Admin  
Sample : SKG-452-I  
Inj. Volume : 5.000  
Data Name : C:\LCMSsolution\User\Data\SKG-452-I-APCI-POS1.qld  
Method Name : C:\LCMSsolution\User\Method\esi.qlm

MS Spectrum

Line#:1 R.Time:0.759(Scan#:46) Positive  
MassPeaks:172 BasePeak:253.05(6921410)  
RawMode:Single 0.759(46)  
BG Mode:Peak Start 0.560(34)

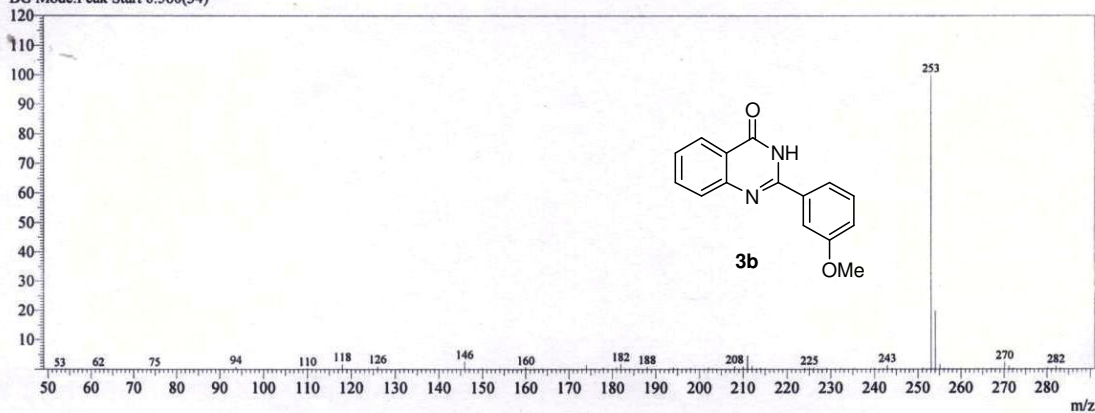

MS Peak Table

| Peak# | R.Time | I.Time | F.Time | Area      | Height   | A/H   | Mark | %Total | Name | Base m/z | Base Int. |
|-------|--------|--------|--------|-----------|----------|-------|------|--------|------|----------|-----------|
| 1     | 0.759  | 0.560  | 1.043  | 171035756 | 15606881 | 10.95 |      | 100.00 |      | 253.05   | 6921410   |
|       |        |        |        | 171035756 | 15606881 |       |      | 100.00 |      |          |           |

FLASH EA 1112 SERIES CHN REPORT  
SCHOOL OF CHEMISTRY  
UNIVERSITY OF HYDERABAD

Method filename: C:\Program Files\Thermo Finnigan\Eager 300 for EA1112\DATA\Sys\_data\_ex  
Sample ID: SKG-452-I (# 155)  
Analysis type: UnkNown  
Chromatogram filename: UNK-18022015-15.dat  
Sample weight: 1.106

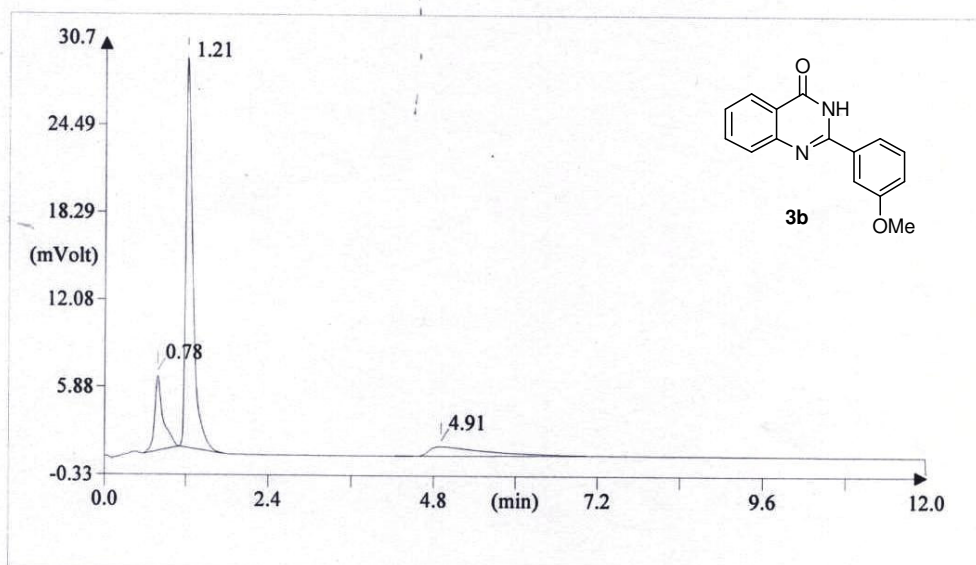

| Element Name | Element % | Ret. Time |
|--------------|-----------|-----------|
| Nitrogen     | 11.26     | 0.78      |
| Carbon       | 71.57     | 1.21      |
| Hydrogen     | 4.71      | 4.91      |

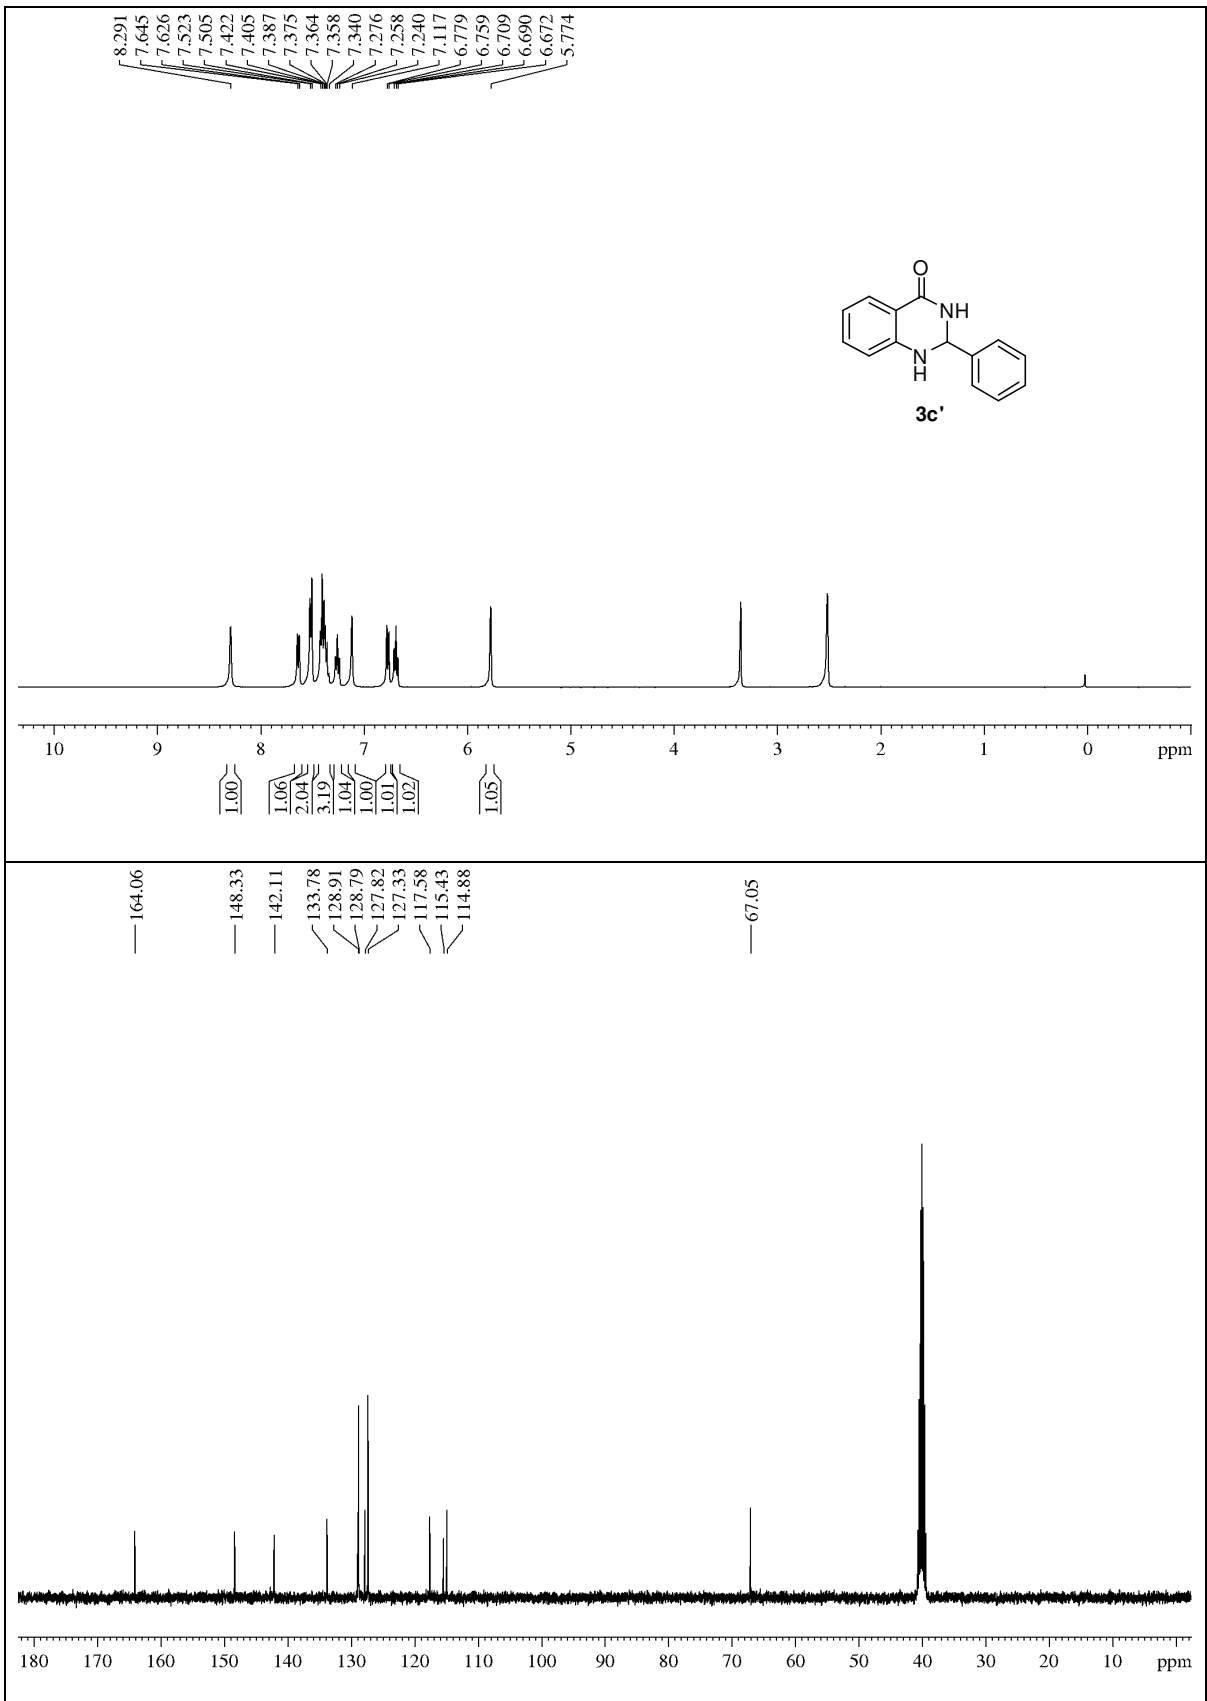

LCMS-2010A DATA REPORT  
SCHOOL OF CHEMISTRY  
UNIVERSITY OF HYDERABAD

User : Admin  
Sample : SKG-493-II  
Inj. Volume : 5.000  
Data Name : C:\LCMSsolution\User\Data\SKG-493-II-APCI-POS1.qld  
Method Name : C:\LCMSsolution\User\Method\esi.qlm

MS Spectrum

Line#1 R.Time:0.773(Scan#:47) Positive  
MassPeaks:268 BasePeak:225.20(8313275)  
RawMode:Single 0.773(47)  
BG Mode:Peak Start 0.527(32)

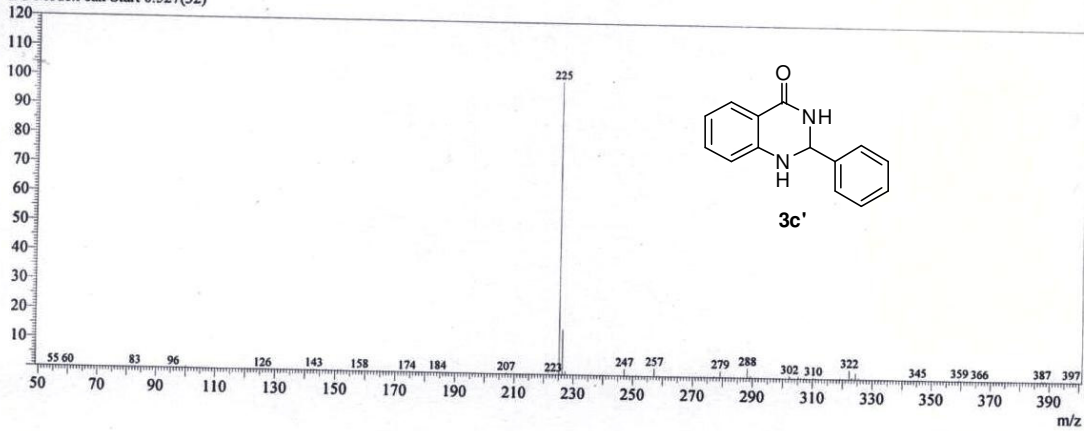

| Peak# | R.Time | I.Time | F.Time | Area      | Height   | A/H   | Mark | %Total | Name |
|-------|--------|--------|--------|-----------|----------|-------|------|--------|------|
| 1     | 0.773  | 0.527  | 1.043  | 246029086 | 18431530 | 13.34 |      | 100.00 |      |
|       |        |        |        | 246029086 | 18431530 |       |      | 100.00 |      |

Base m/z Base Int.  
225.20 8313275

FLASH EA 1112 SERIES CHN REPORT  
SCHOOL OF CHEMISTRY  
UNIVERSITY OF HYDERABAD

Method filename: C:\Program Files\Thermo Finnigan\Eager 300 for EA1112\DATA\Sys\_data\_ex  
Sample ID: SKG-493-II (# 156)  
Analysis type: UnkNown  
Chromatogram filename: UNK-18022015-16.dat  
Sample weight: 1.141

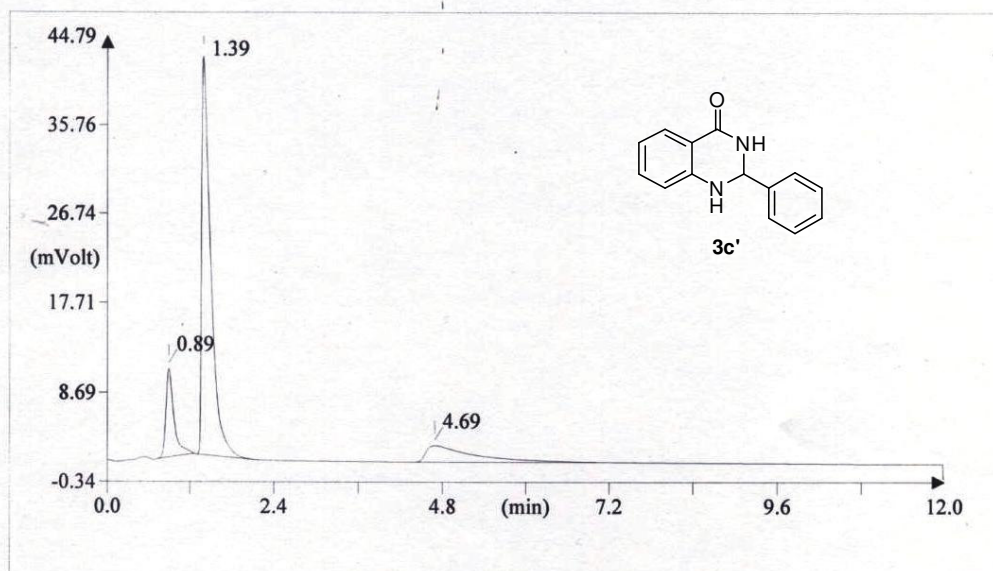

| Element Name | Element % | Ret. Time |
|--------------|-----------|-----------|
| Nitrogen     | 12.56     | 0.89      |
| Carbon       | 74.82     | 1.39      |
| Hydrogen     | 5.45      | 4.69      |

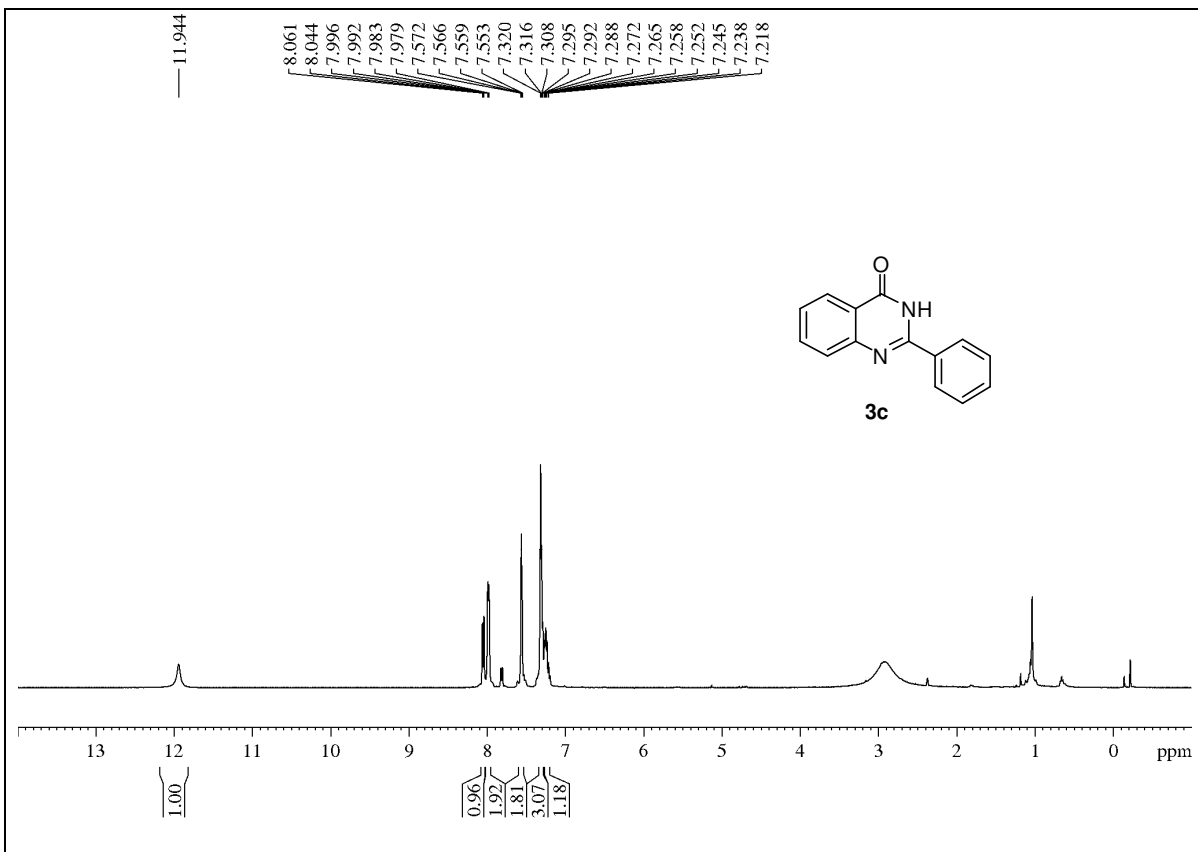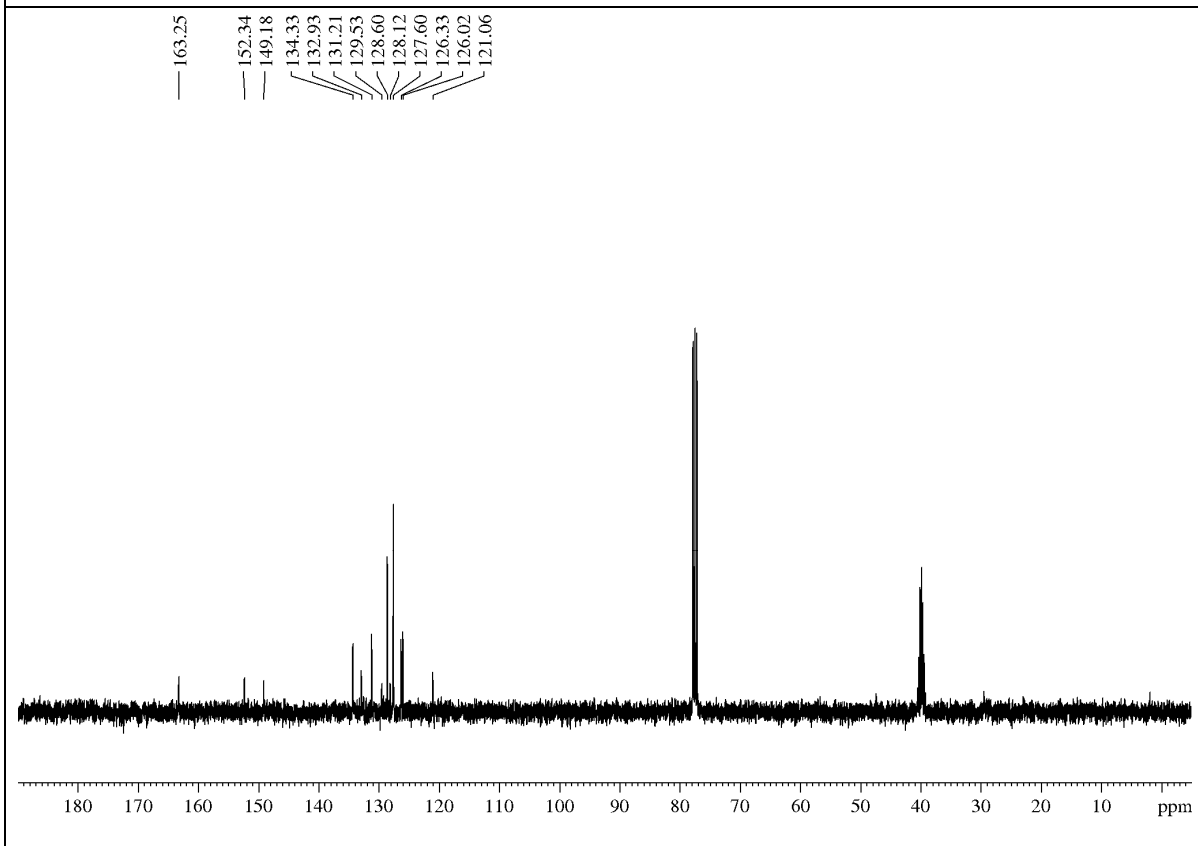



LCMS-2010A DATA REPORT  
SCHOOL OF CHEMISTRY  
UNIVERSITY OF HYDERABAD

User : Admin  
Sample : SKG-493-I  
Inj. Volume : 5.000  
Data Name : C:\LCMSSolution\User\Data\SKG-493-I-APCI-POS1.qld  
Method Name : C:\LCMSSolution\User\Method\esi.qlm

MS Spectrum

Line#:1 R.Time:0.782(Scan#:47) Positive  
MassPeaks:257 BasePeak:223.10(8019945)  
RawMode:Single 0.782(47)  
BG Mode:Peak Start 0.577(35)

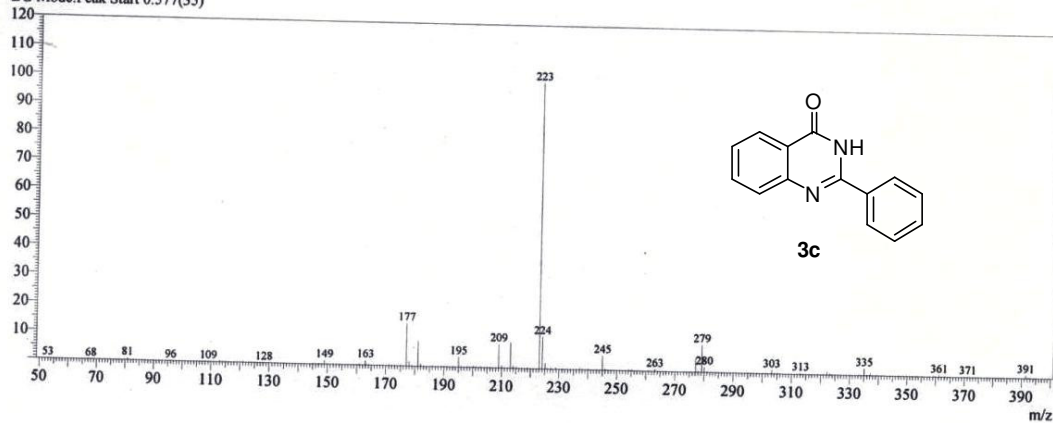

MS Peak Table

| Peak# | R. Time | I. Time | F. Time | Area      | Height   | A/H   | Mark | %Total | Name | Base m/z | Base Int. |
|-------|---------|---------|---------|-----------|----------|-------|------|--------|------|----------|-----------|
| 1     | 0.782   | 0.577   | 1.043   | 200722973 | 16822675 | 11.93 |      | 100.00 |      | 223.10   | 8019945   |
|       |         |         |         | 200722973 | 16822675 |       |      | 100.00 |      |          |           |

FLASH EA 1112 SERIES CHN REPORT  
SCHOOL OF CHEMISTRY  
UNIVERSITY OF HYDERABAD

Method filename: C:\Program Files\Thermo Finnigan\Eager 300 for EA1112\DATA\Sys\_data\_ex  
Sample ID: SKG-493-I (# 141)  
Analysis type: UnkNown  
Chromatogram filename: UNK-18022015-1.dat  
Sample weight: 1.496

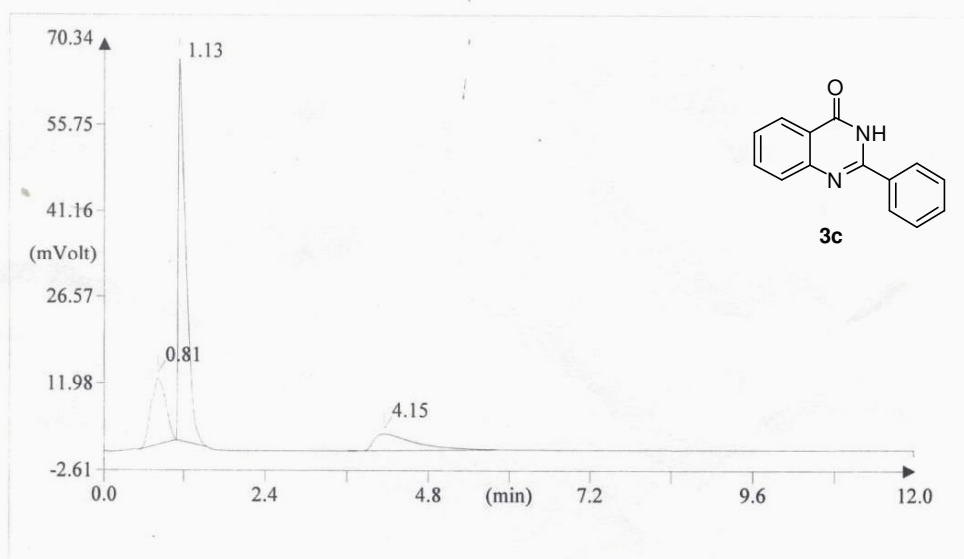

| Element Name | Element % | Ret. Time |
|--------------|-----------|-----------|
| Nitrogen     | 12.53     | 0.81      |
| Carbon       | 75.81     | 1.13      |
| Hydrogen     | 4.51      | 4.15      |

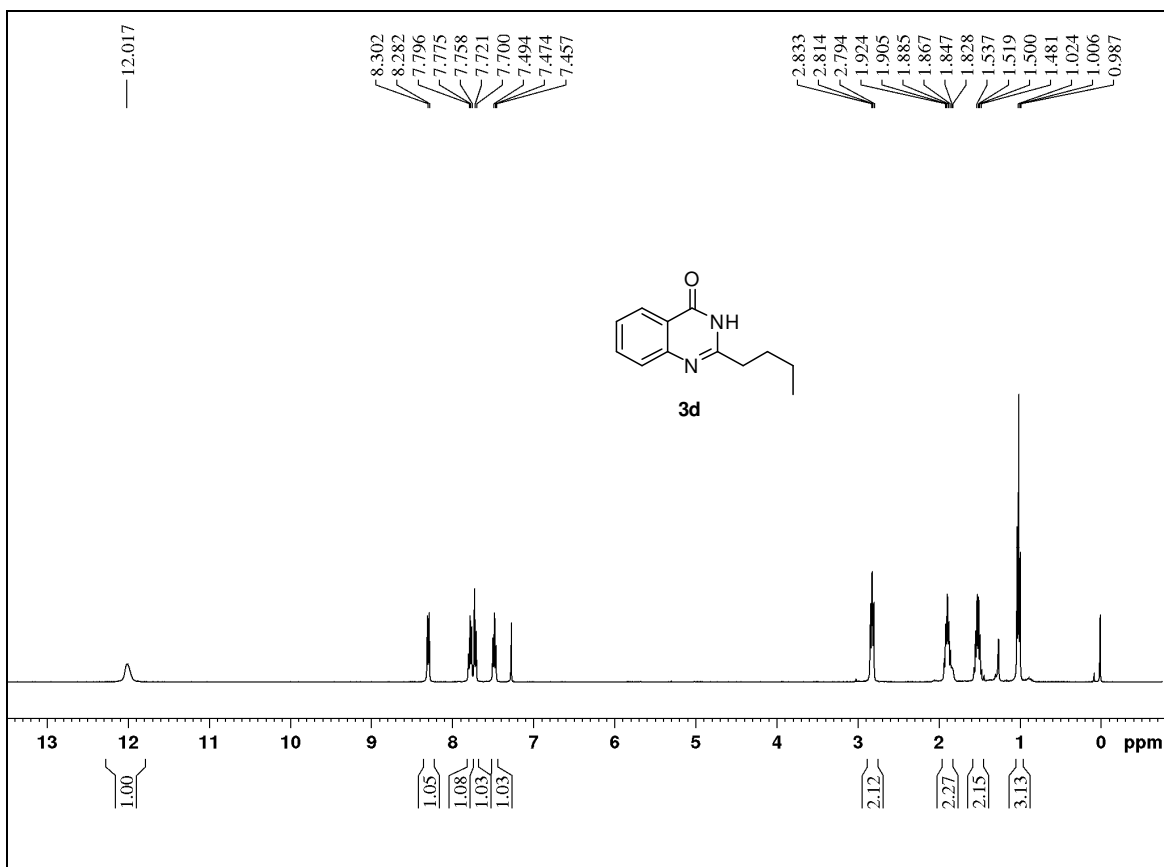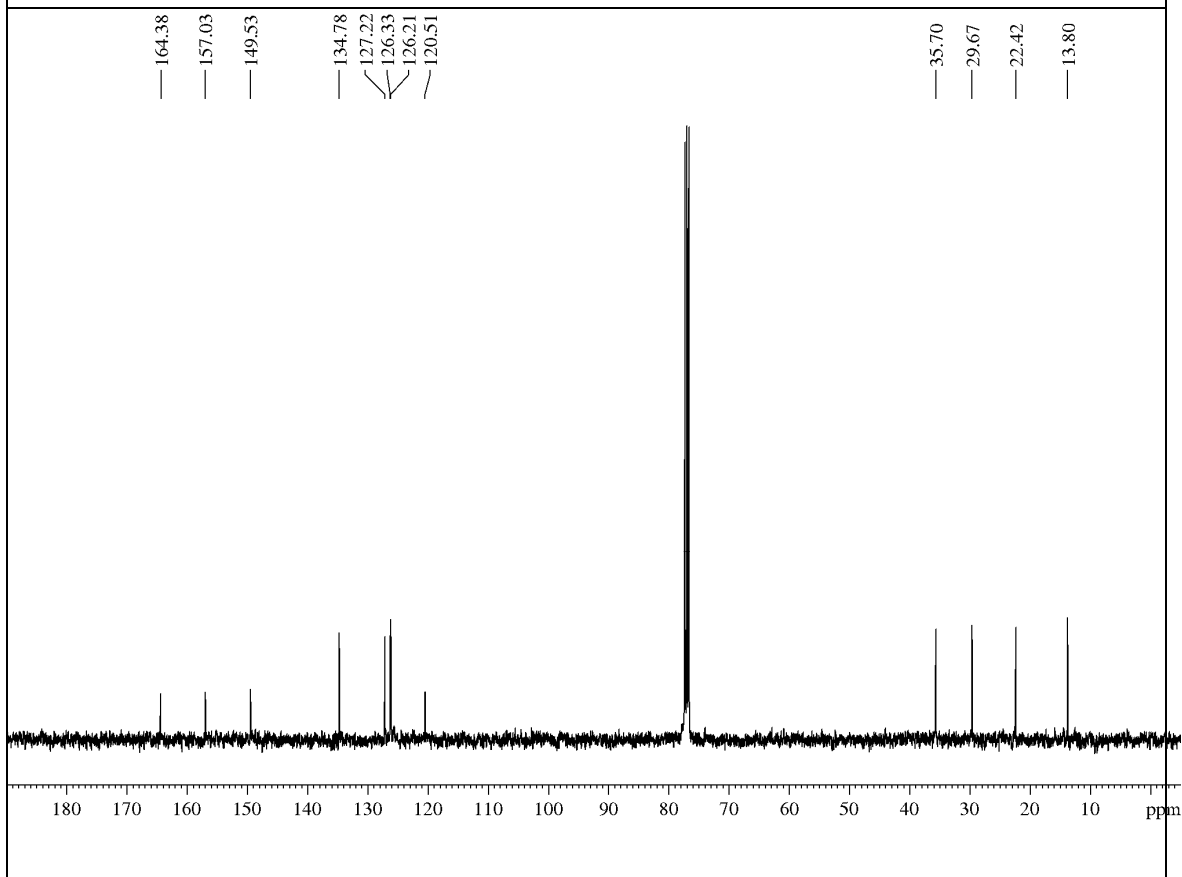

# BRUKER MAXIS HRMS REPORT

School of Chemistry  
University of Hyderabad

## Analysis Info

Analysis Name D:\Data\2015\DrNagarajan\AUG\SKG-613-IIR.d  
Method tune\_low.m  
Sample Name SKG-613-II-DCM-MEOH  
Comment

Acquisition Date 8/19/2015 11:51:01 AM

Operator Ramu Sridhar  
Instrument maXis 10138

## Acquisition Parameter

|             |            |                       |           |                  |           |
|-------------|------------|-----------------------|-----------|------------------|-----------|
| Source Type | ESI        | Ion Polarity          | Positive  | Set Nebulizer    | 4.4 psi   |
| Focus       | Not active | Set Capillary         | 3200 V    | Set Dry Heater   | 180 °C    |
| Scan Begin  | 50 m/z     | Set End Plate Offset  | -500 V    | Set Dry Gas      | 4.0 l/min |
| Scan End    | 1700 m/z   | Set Collision Cell RF | 150.0 Vpp | Set Divert Valve | Waste     |

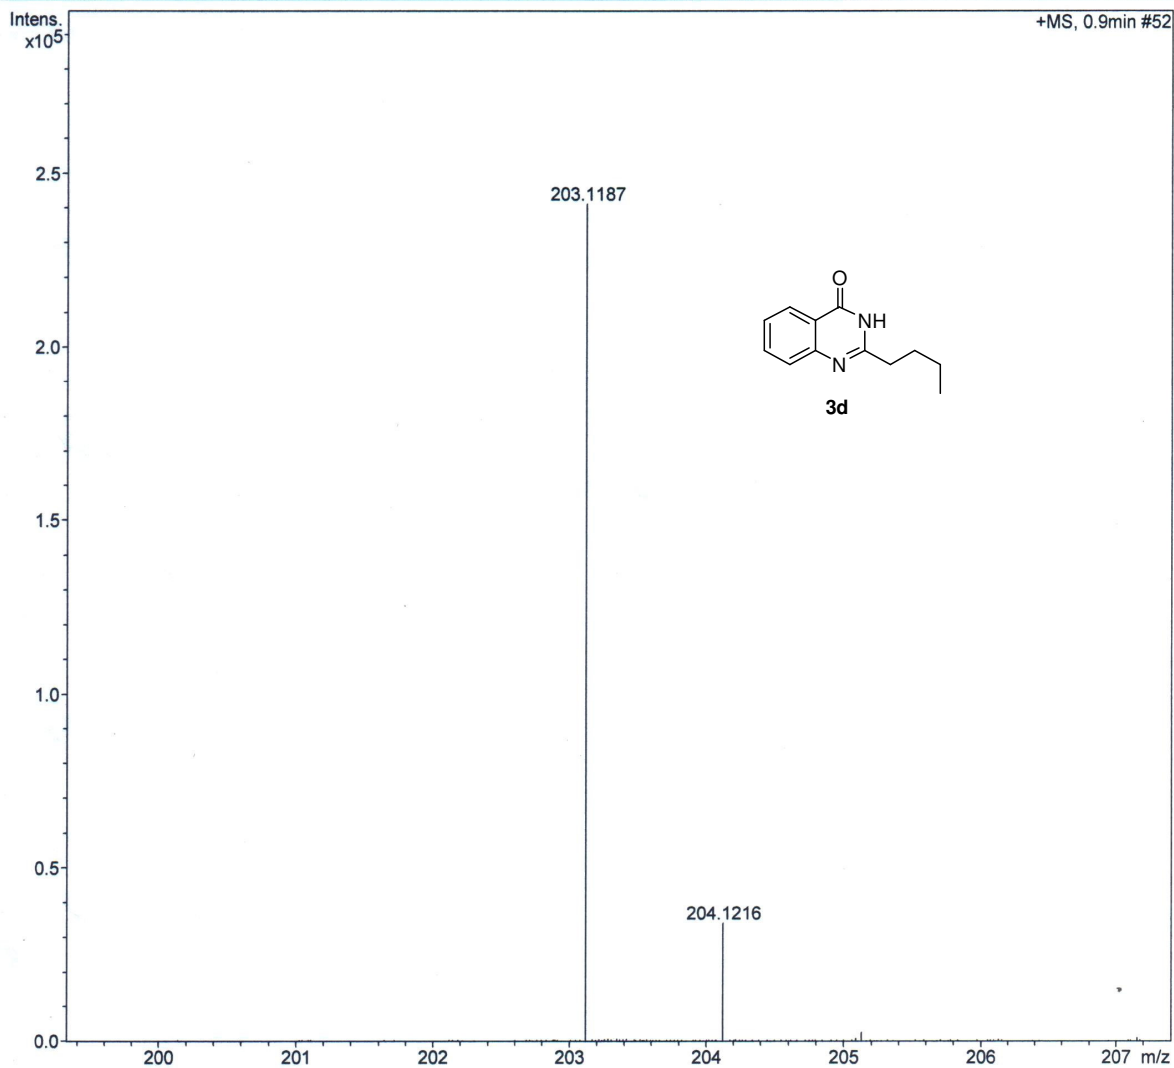

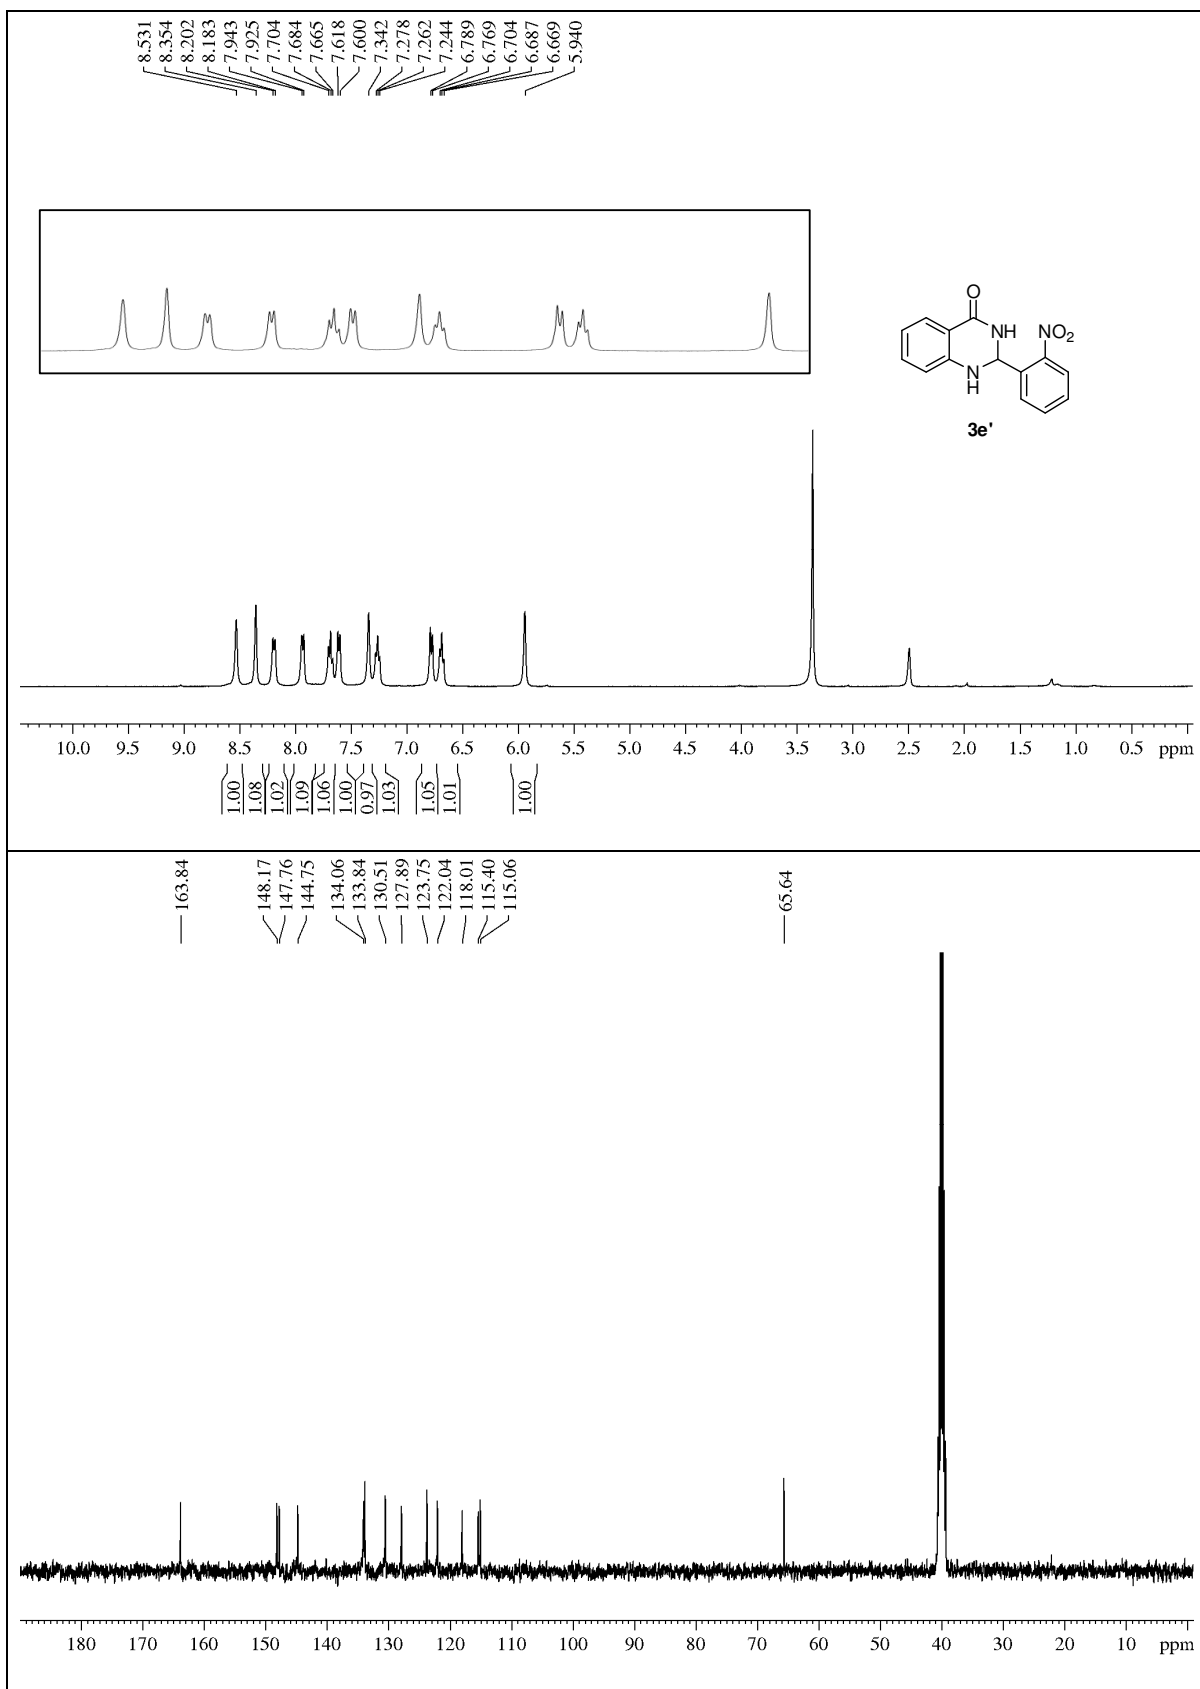

# BRUKER MAXIS HRMS REPORT

School of Chemistry  
University of Hyderabad

## Analysis Info

Analysis Name D:\Data\2014\NAGARAJANAPRL\SKG-503.d  
Method tune\_low\_Pos.m  
Sample Name SKG-503-DCM-MEOH  
Comment

Acquisition Date 4/16/2014 12:13:15 PM

Operator Ramu Sridhar  
Instrument maXis 10138

## Acquisition Parameter

|             |            |                       |           |                  |           |
|-------------|------------|-----------------------|-----------|------------------|-----------|
| Source Type | ESI        | Ion Polarity          | Positive  | Set Nebulizer    | 4.4 psi   |
| Focus       | Not active | Set Capillary         | 3800 V    | Set Dry Heater   | 180 °C    |
| Scan Begin  | 50 m/z     | Set End Plate Offset  | -500 V    | Set Dry Gas      | 4.0 l/min |
| Scan End    | 1500 m/z   | Set Collision Cell RF | 350.0 Vpp | Set Divert Valve | Waste     |

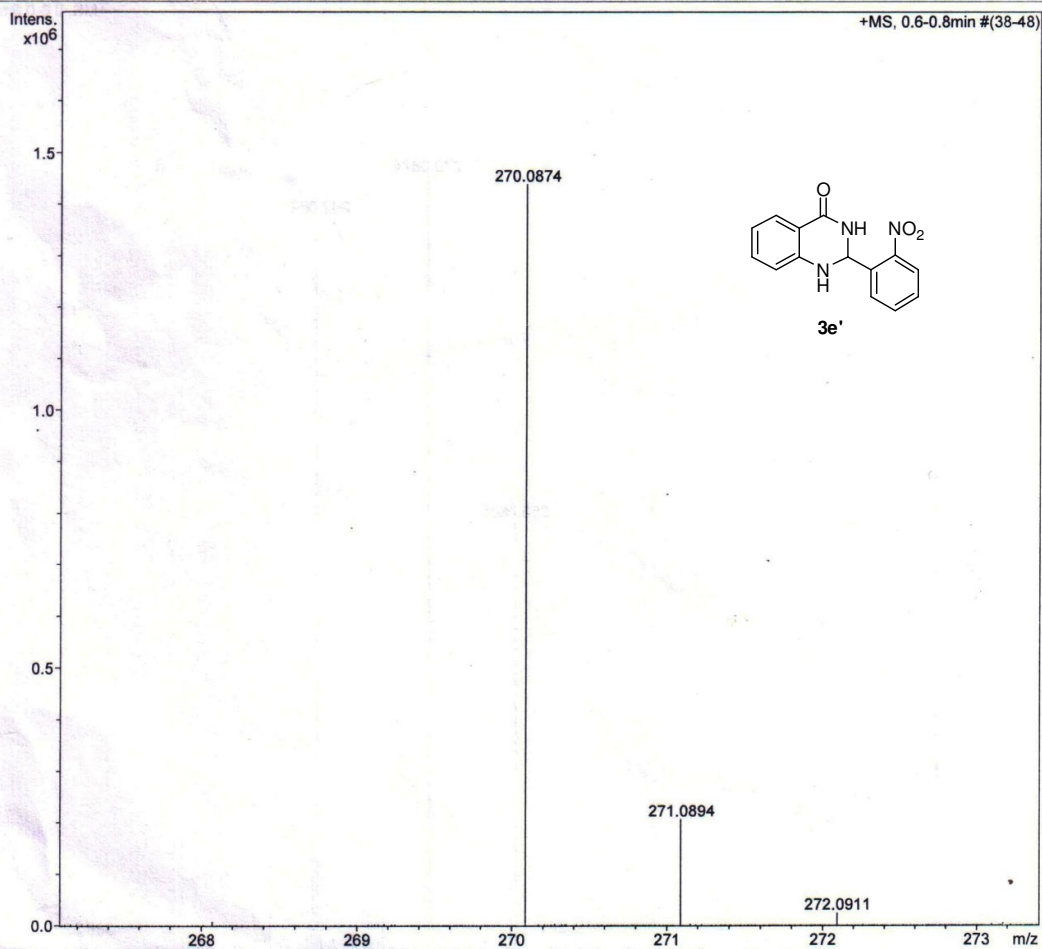

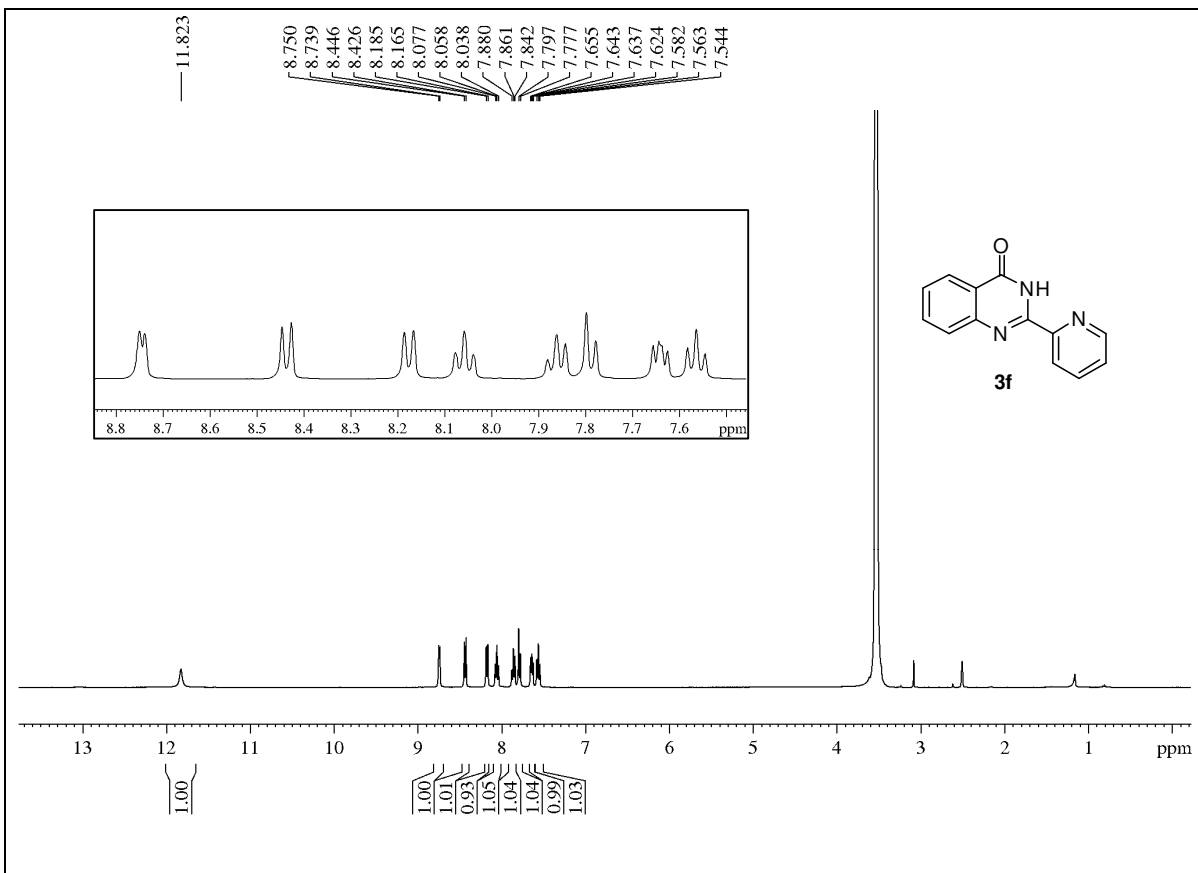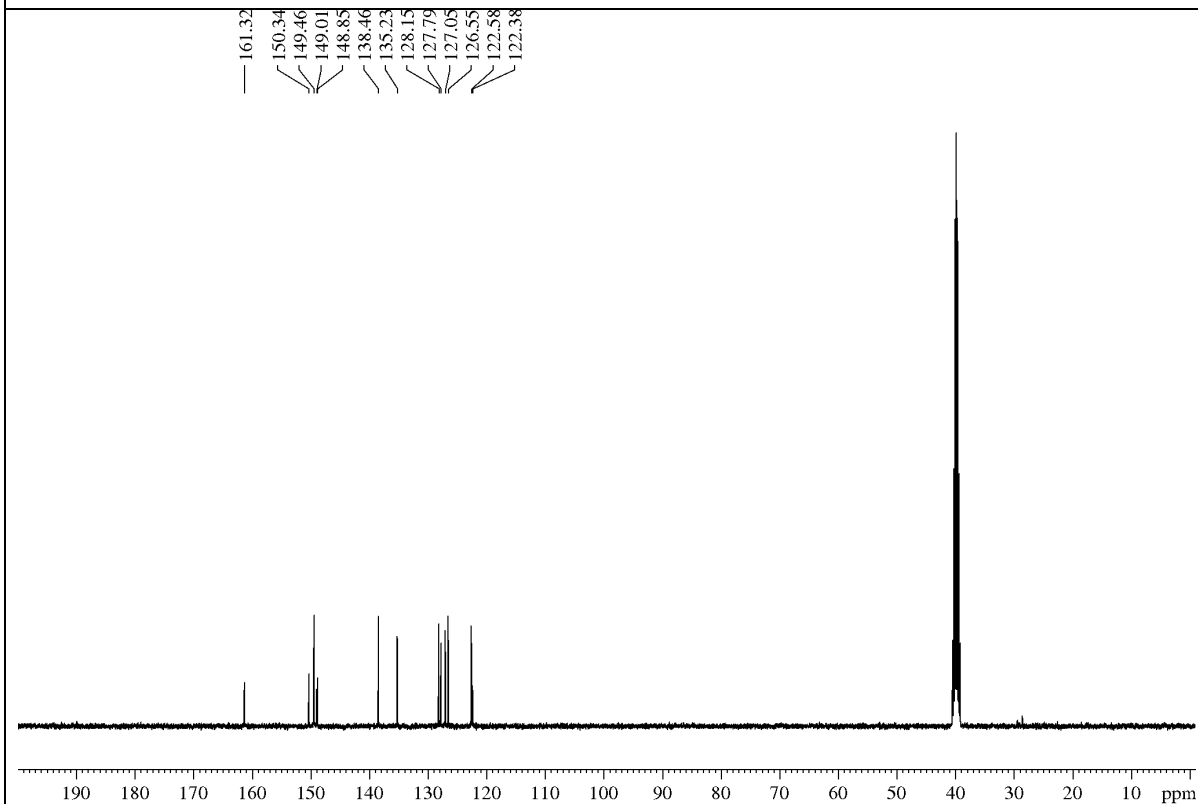



**LCMS-2010A DATA REPORT  
SCHOOL OF CHEMISTRY  
UNIVERSITY OF HYDERABAD**

User : Admin  
Sample : SKG-533  
Inj. Volume : 5.000  
Data Name : C:\LCMSsolution\User\Data\SKG-533-APCI-POS1.qld  
Method Name : C:\LCMSsolution\User\Method\esi.qlm

MS Spectrum

Line#:1 R.Time:0.786(Scan#:48) Positive  
MassPeaks:84 BasePeak:224.10(13443212)  
RawMode:Single 0.786(48)  
BG Mode:Peak Start 0.527(32)

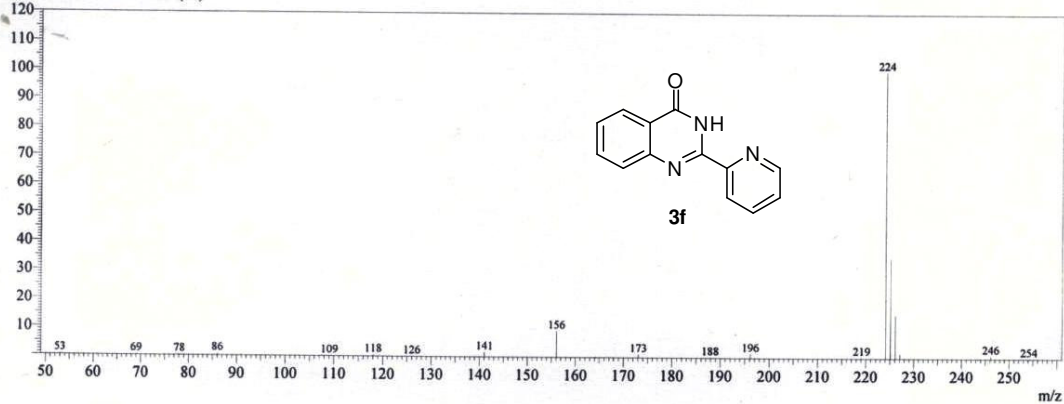

MS Peak Table

| Peak# | R.Time | I.Time | F.Time | Area      | Height   | A/H   | Mark | %Total | Name | Base m/z | Base Int. |
|-------|--------|--------|--------|-----------|----------|-------|------|--------|------|----------|-----------|
| 1     | 0.786  | 0.527  | 1.043  | 293076473 | 19476036 | 15.04 |      | 100.00 |      | 224.10   | 13443212  |
|       |        |        |        | 293076473 | 19476036 |       |      | 100.00 |      |          |           |

FLASH EA 1112 SERIES CHN REPORT  
SCHOOL OF CHEMISTRY  
UNIVERSITY OF HYDERABAD

Method filename: C:\Program Files\Thermo Finnigan\Eager 300 for EA1112\DATA\Sys\_data\_ex  
Sample ID: SKG-533 (# 164)  
Analysis type: UnkNown  
Chromatogram filename: UNK-18022015-24.dat  
Sample weight: 1.146

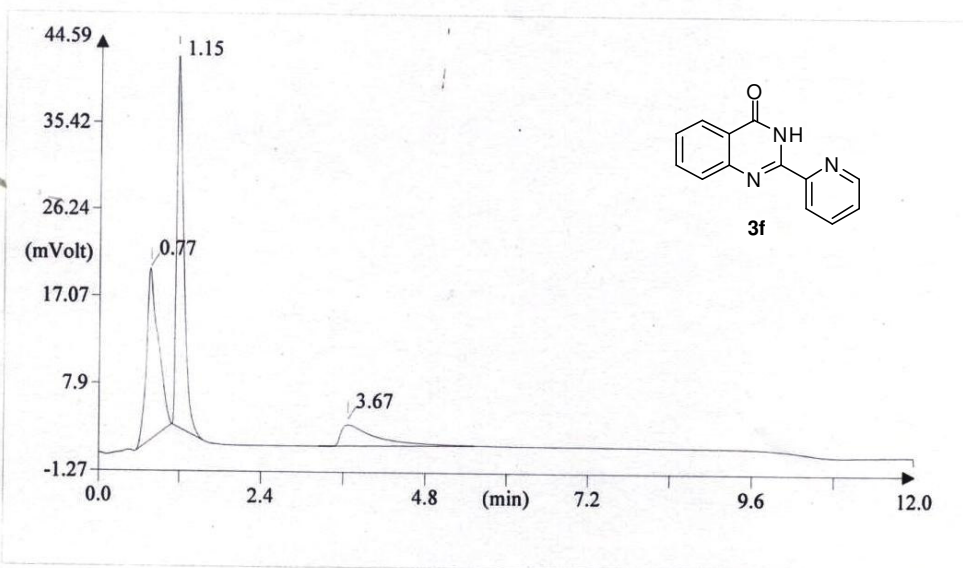

| Element Name | Element % | Ret. Time |
|--------------|-----------|-----------|
| Nitrogen     | 18.75     | 0.77      |
| Carbon       | 69.86     | 1.15      |
| Hydrogen     | 4.15      | 3.67      |

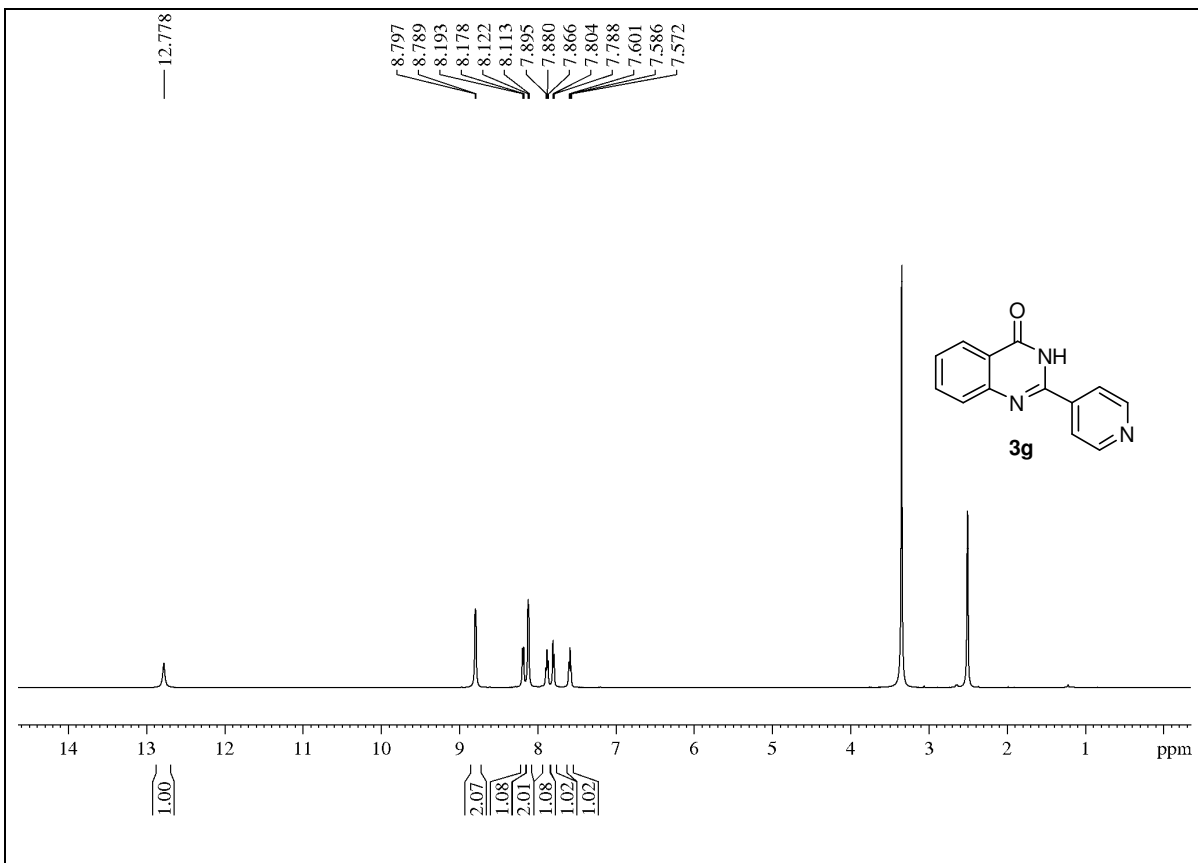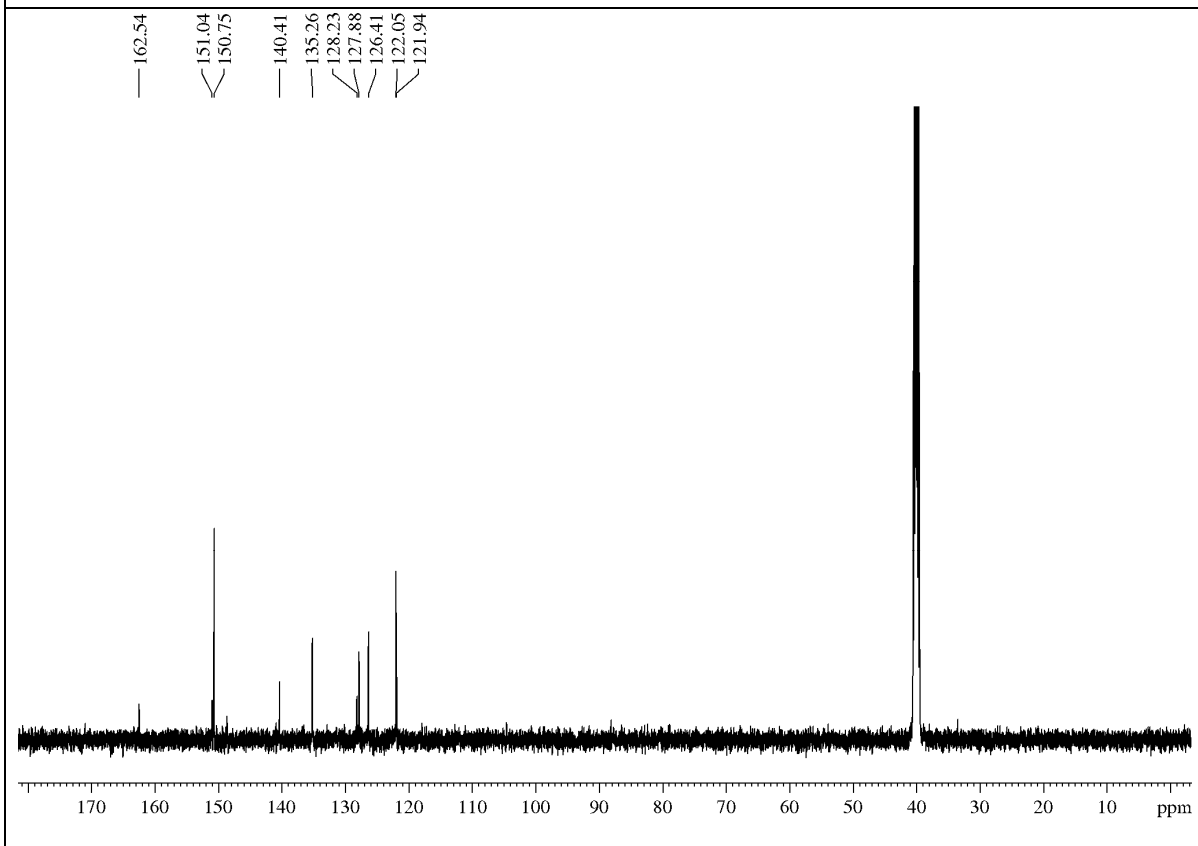

# BRUKER MAXIS HRMS REPORT

School of Chemistry  
University of Hyderabad

## Analysis Info

Analysis Name D:\Data\2015\DrNagarajan\JULY\SKG-766R2.d  
Method tune\_low\_Pos.m  
Sample Name SKG-766-DCM-MEOH  
Comment

Acquisition Date 7/20/2015 12:15:37 PM

Operator Ramu Sridhar  
Instrument maXis 10138

## Acquisition Parameter

|             |            |                       |           |                  |           |
|-------------|------------|-----------------------|-----------|------------------|-----------|
| Source Type | ESI        | Ion Polarity          | Positive  | Set Nebulizer    | 6.0 psi   |
| Focus       | Not active | Set Capillary         | 4500 V    | Set Dry Heater   | 180 °C    |
| Scan Begin  | 50 m/z     | Set End Plate Offset  | -500 V    | Set Dry Gas      | 6.0 l/min |
| Scan End    | 1500 m/z   | Set Collision Cell RF | 350.0 Vpp | Set Divert Valve | Waste     |

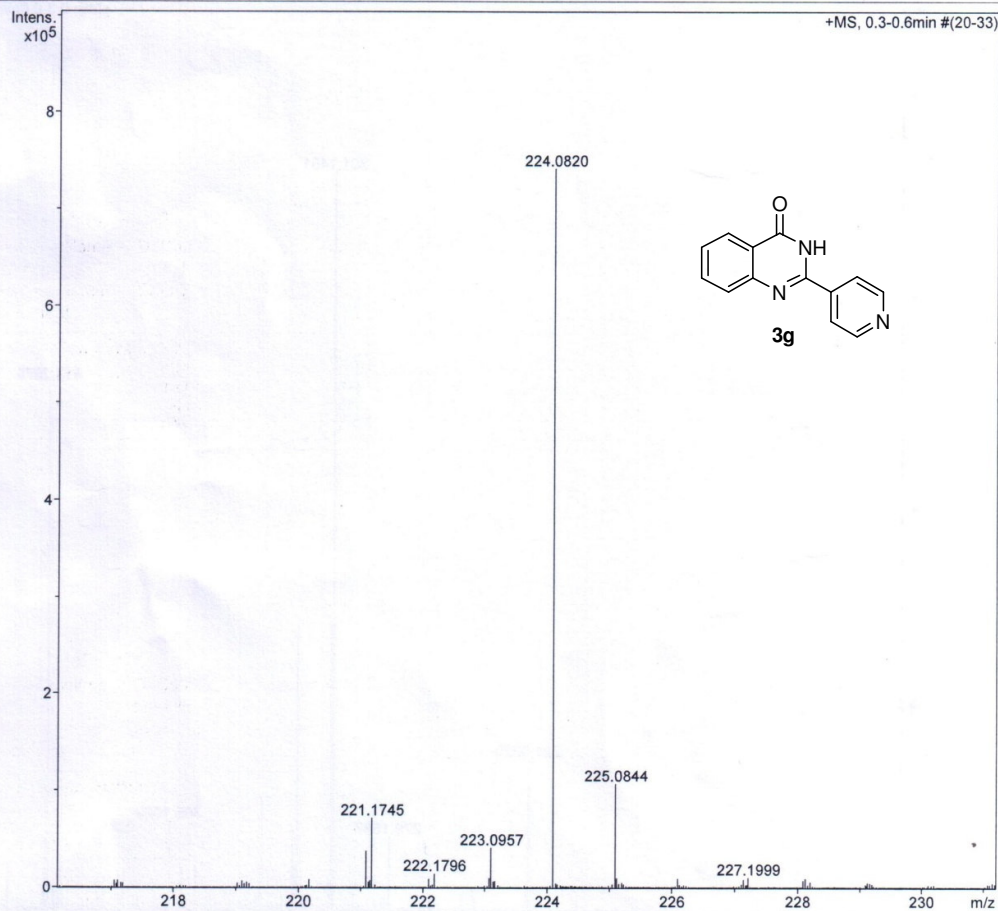

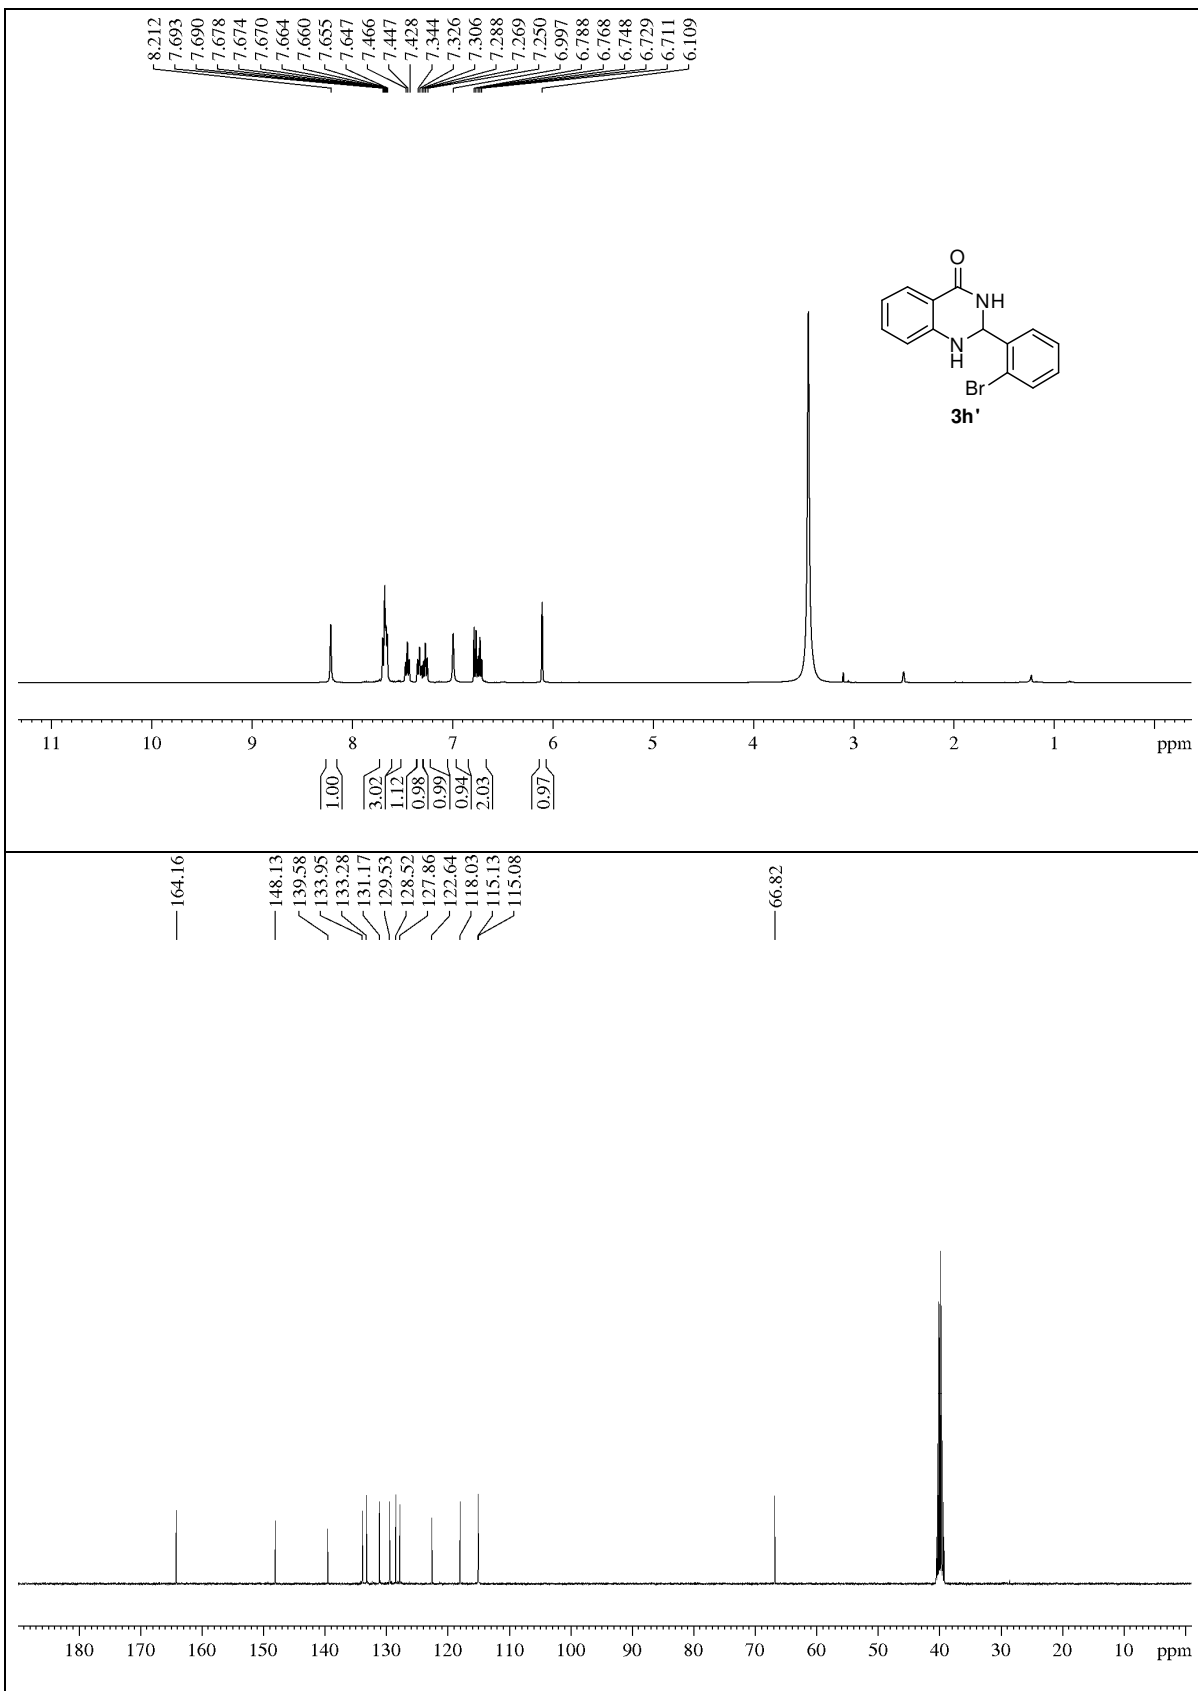



# BRUKER MAXIS HRMS REPORT

School of Chemistry  
University of Hyderabad

## Analysis Info

Analysis Name D:\Data\2015\DrNagarajan\JULY\SKG-605R1.d  
Method TL-P.m  
Sample Name SKG-605-DCM-MEOH  
Comment

Acquisition Date 7/2/2015 12:37:42 PM

Operator Ramu Sridhar  
Instrument maXis 10138

## Acquisition Parameter

|             |            |                       |           |                  |           |
|-------------|------------|-----------------------|-----------|------------------|-----------|
| Source Type | ESI        | Ion Polarity          | Positive  | Set Nebulizer    | 4.4 psi   |
| Focus       | Not active | Set Capillary         | 3800 V    | Set Dry Heater   | 180 °C    |
| Scan Begin  | 50 m/z     | Set End Plate Offset  | -500 V    | Set Dry Gas      | 4.0 l/min |
| Scan End    | 600 m/z    | Set Collision Cell RF | 350.0 Vpp | Set Divert Valve | Waste     |

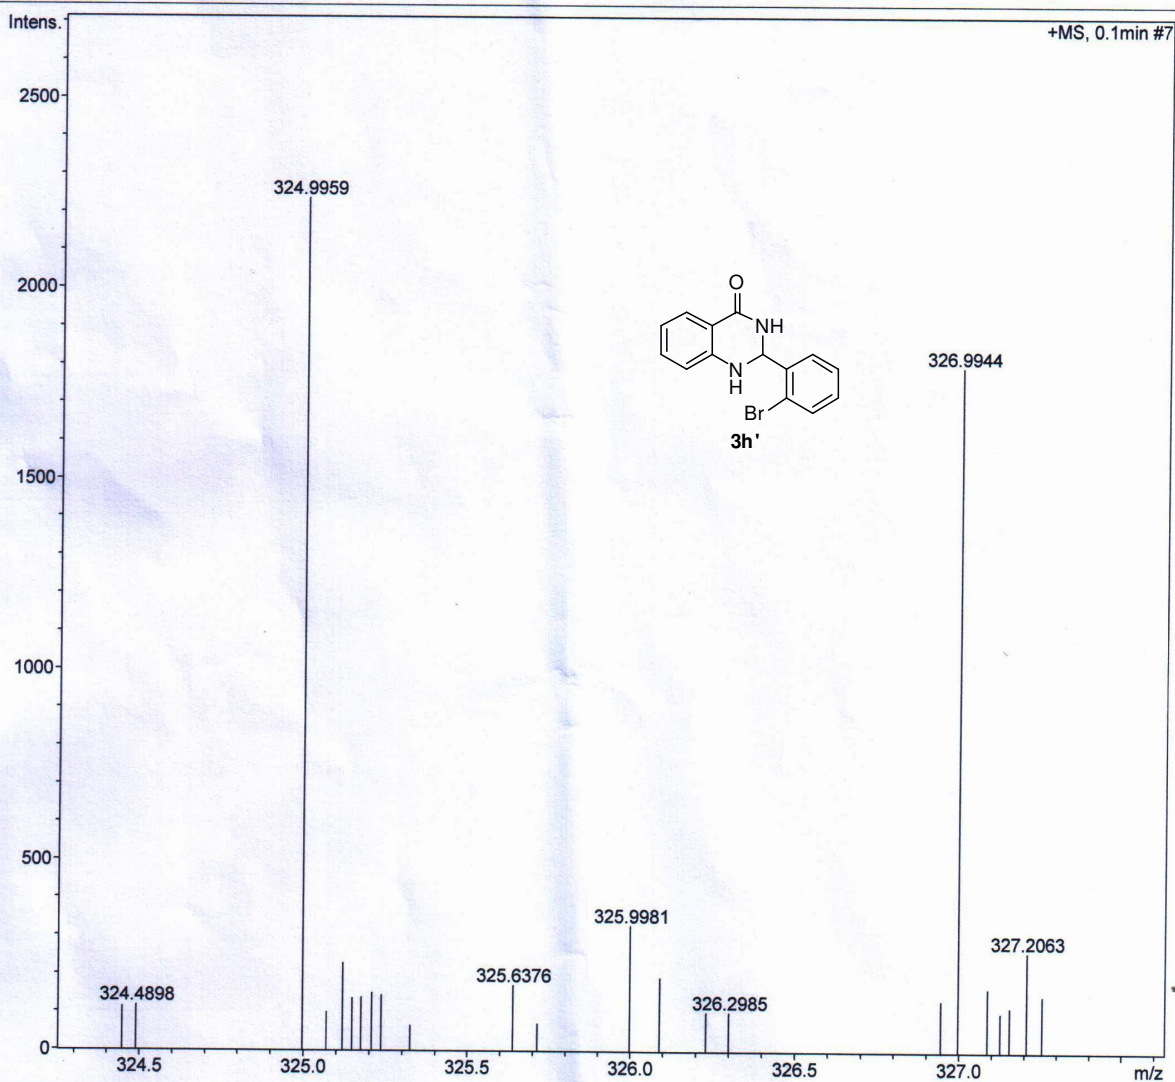

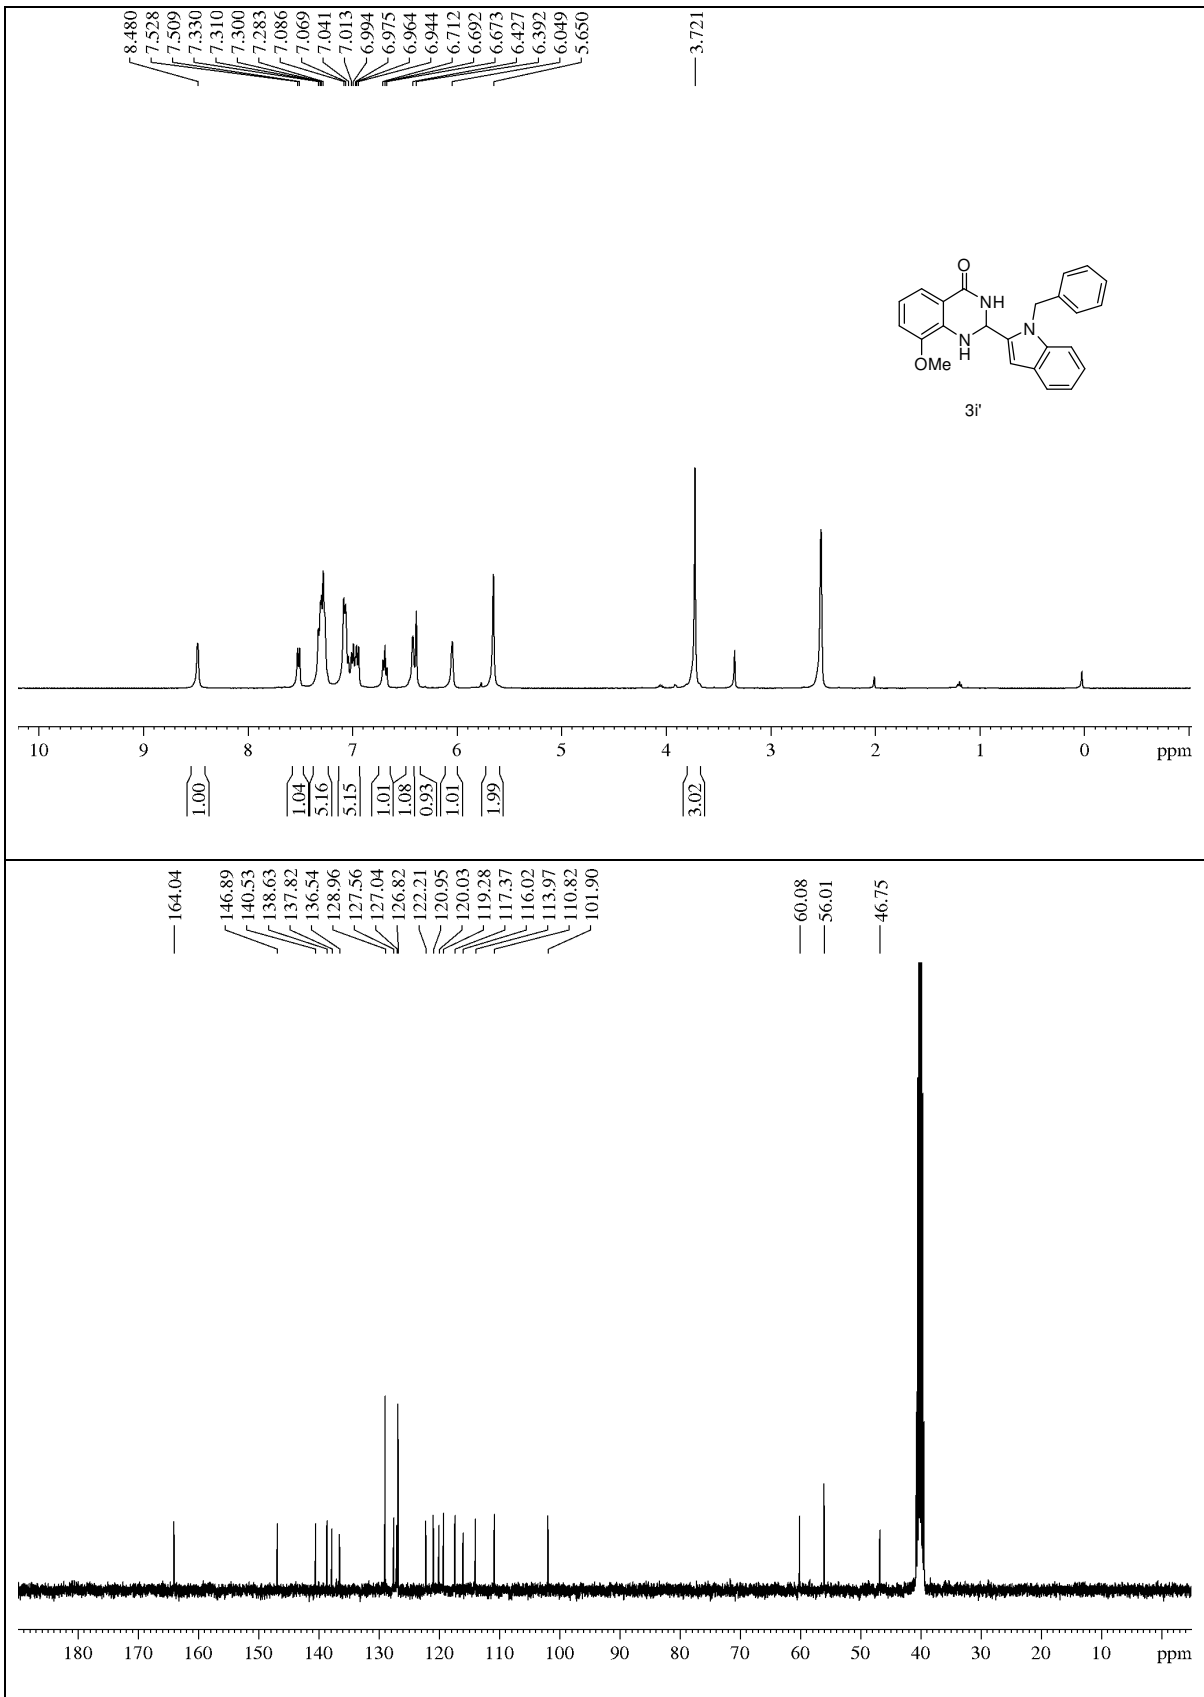



# BRUKER MAXIS HRMS REPORT

School of Chemistry  
University of Hyderabad

## Analysis Info

Analysis Name D:\Data\2015\DrNagarajan\FEB\SKG-564R.d  
Method tune\_low\_Pos.m  
Sample Name SKG-564-DCM-MEOH  
Comment

Acquisition Date 2/23/2015 1:34:03 PM

Operator Ramu Sridhar  
Instrument maXis 10138

## Acquisition Parameter

|             |            |                       |           |                  |           |
|-------------|------------|-----------------------|-----------|------------------|-----------|
| Source Type | ESI        | Ion Polarity          | Positive  | Set Nebulizer    | 1.0 Bar   |
| Focus       | Not active | Set Capillary         | 4400 V    | Set Dry Heater   | 180 °C    |
| Scan Begin  | 50 m/z     | Set End Plate Offset  | -500 V    | Set Dry Gas      | 6.0 l/min |
| Scan End    | 1500 m/z   | Set Collision Cell RF | 250.0 Vpp | Set Divert Valve | Waste     |

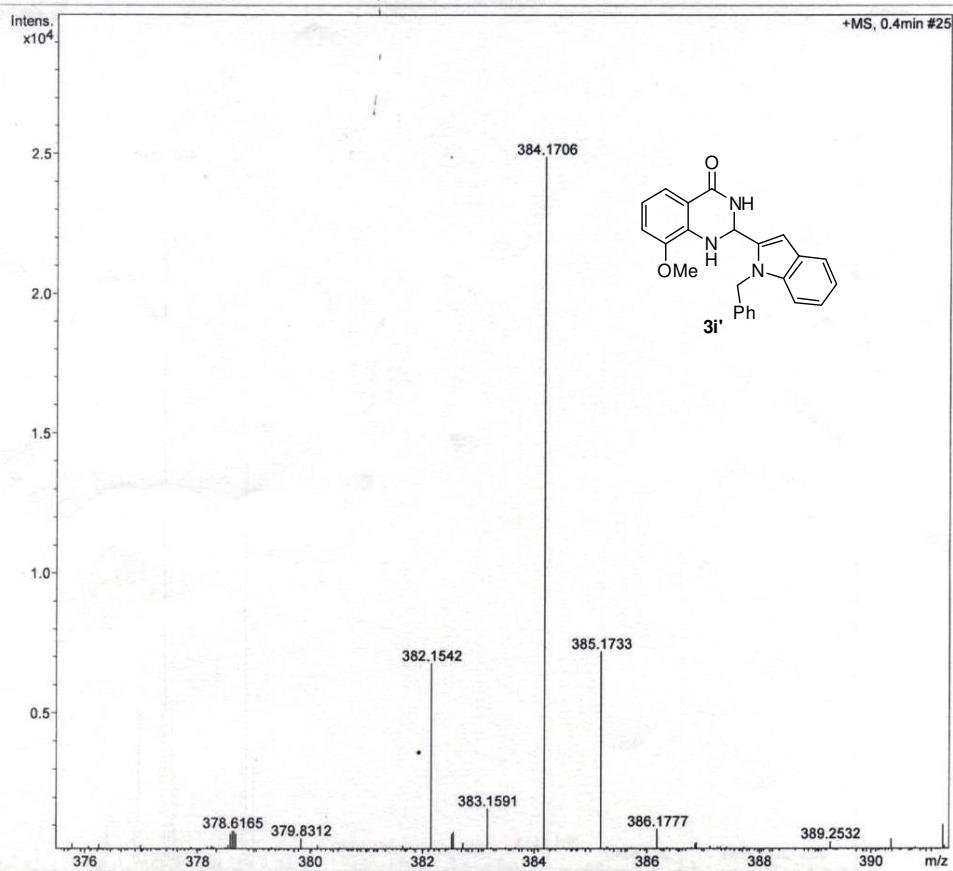

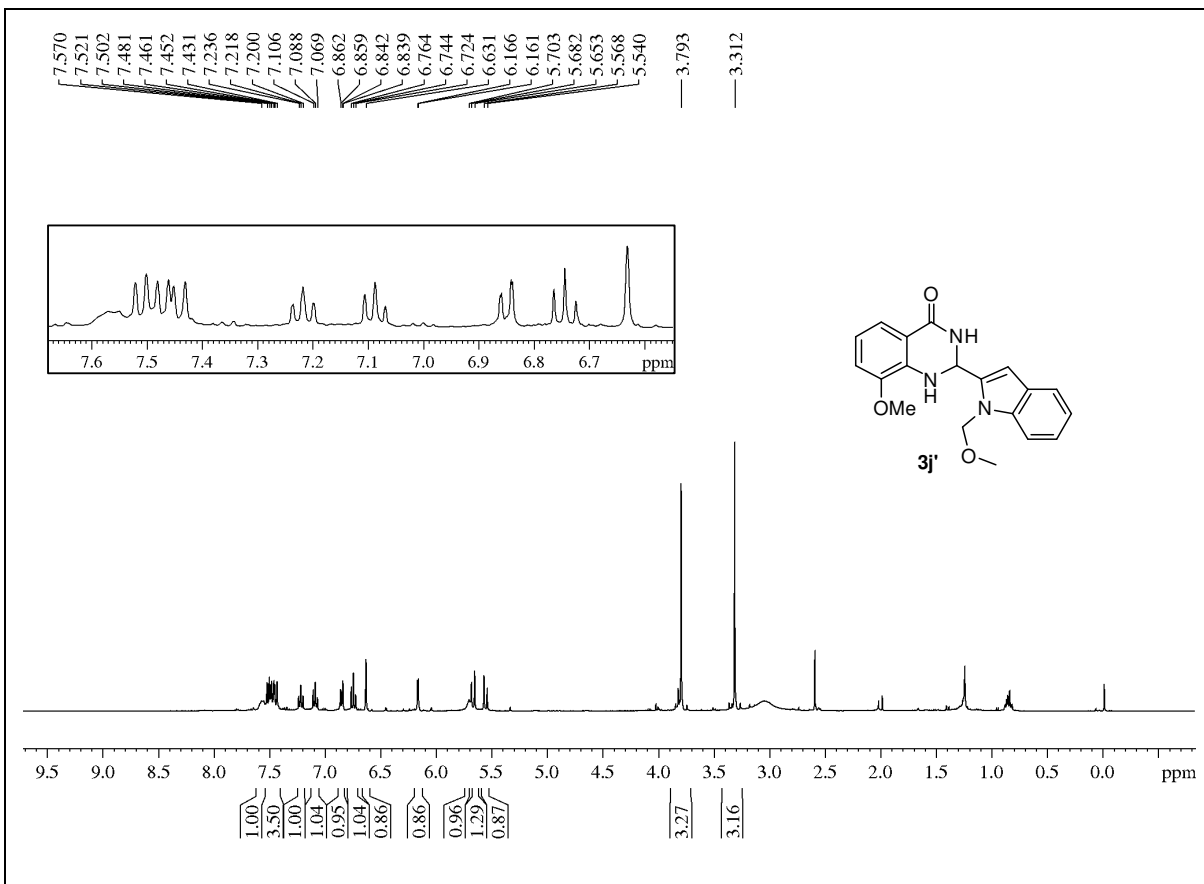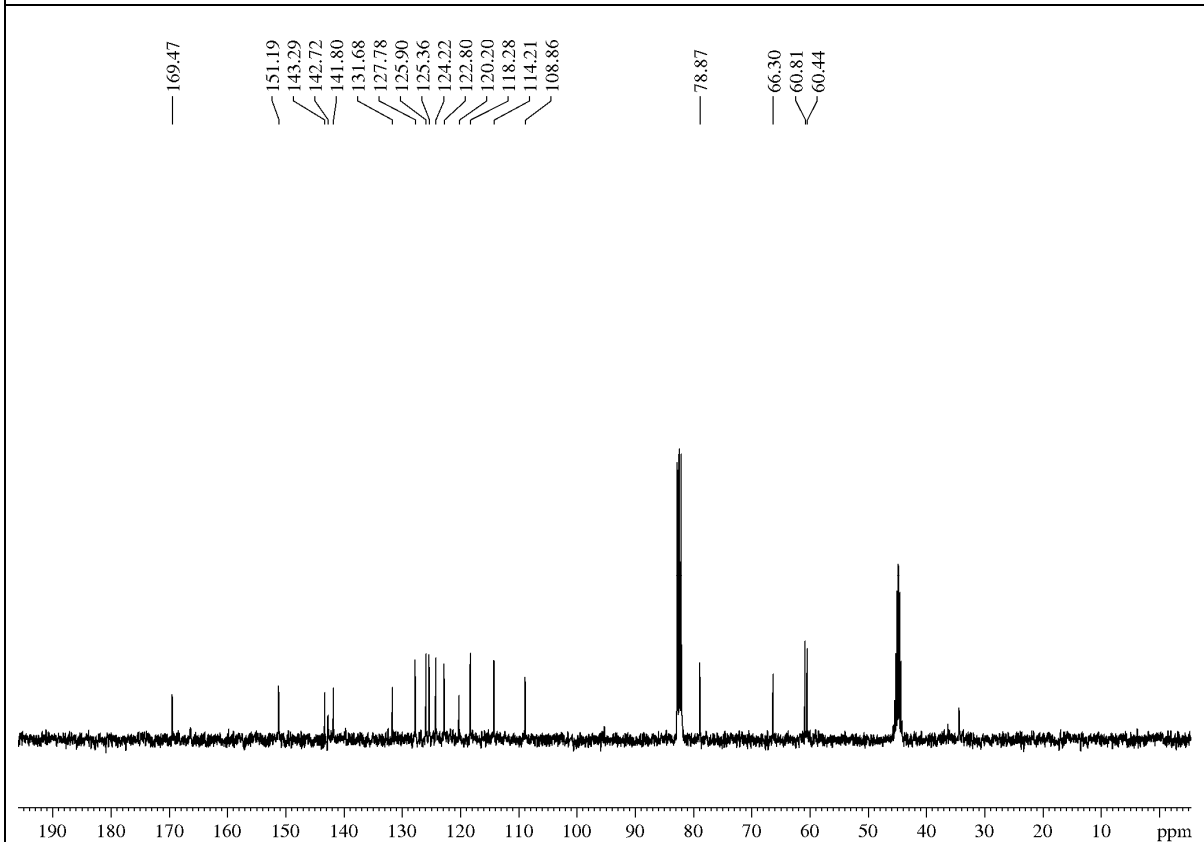

**LCMS-2010A DATA REPORT  
SCHOOL OF CHEMISTRY  
UNIVERSITY OF HYDERABAD**

User : Admin  
 Sample : SKG-622  
 Inj. Volume : 5.000  
 Data Name : C:\LCMSSolution\User\Data\SKG-622-APCI-POS1.qld  
 Method Name : C:\LCMSSolution\User\Method\esi.qlm

MS Spectrum

Line#:1 R.Time:0.788(Scan#:48) Positive  
 MassPeaks:350 BasePeak:338.20(2051111)  
 RawMode:Single 0.788(48)  
 BG Mode:Peak Start 0.560(34)

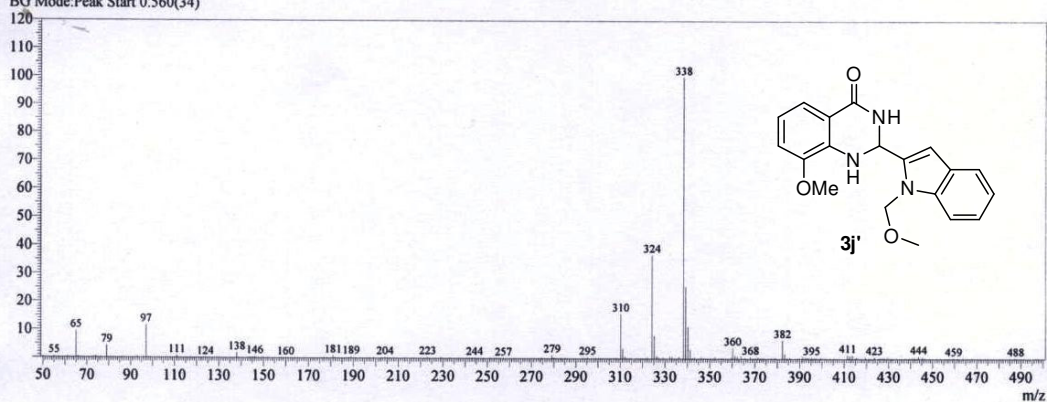

MS Peak Table

| Peak# | R.Time | I.Time | F.Time | Area     | Height  | A/H   | Mark | %Total | Name | Base m/z | Base Int. |
|-------|--------|--------|--------|----------|---------|-------|------|--------|------|----------|-----------|
| 1     | 0.788  | 0.560  | 1.043  | 73767456 | 5944592 | 12.40 |      | 100.00 |      | 338.20   | 2051111   |
|       |        |        |        | 73767456 | 5944592 |       |      | 100.00 |      |          |           |

FLASH EA 1112 SERIES CHN REPORT  
SCHOOL OF CHEMISTRY  
UNIVERSITY OF HYDERABAD

Method filename: C:\Program Files\Thermo Finnigan\Eager 300 for EA1112\DATA\Sys\_data\_ex  
Sample ID: SKG-622 (# 143)  
Analysis type: UnkNown  
Chromatogram filename: UNK-18022015-3.dat  
Sample weight: 1.341

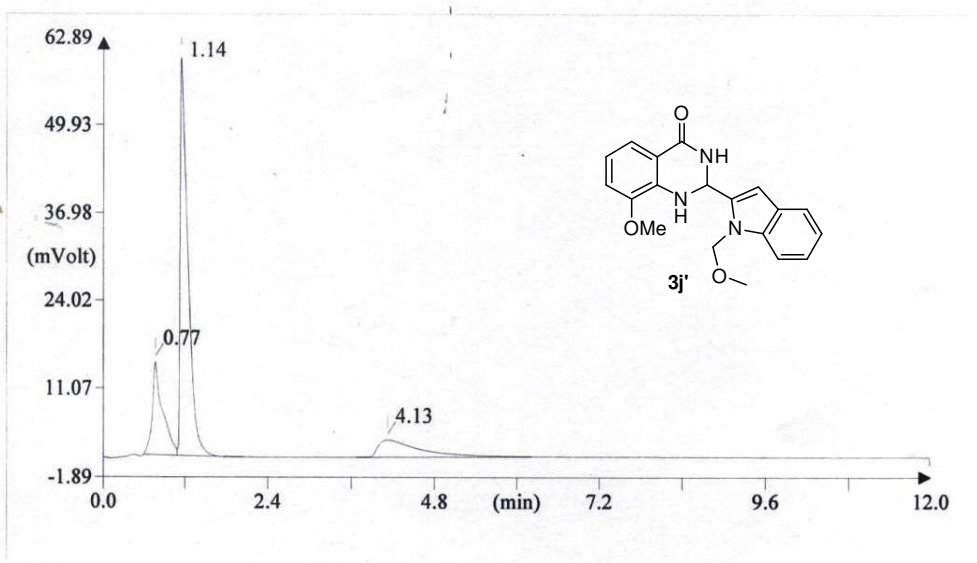

| Element Name | Element % | Ret. Time |
|--------------|-----------|-----------|
| Nitrogen     | 12.38     | 0.77      |
| Carbon       | 67.49     | 1.14      |
| Hydrogen     | 5.73      | 4.13      |

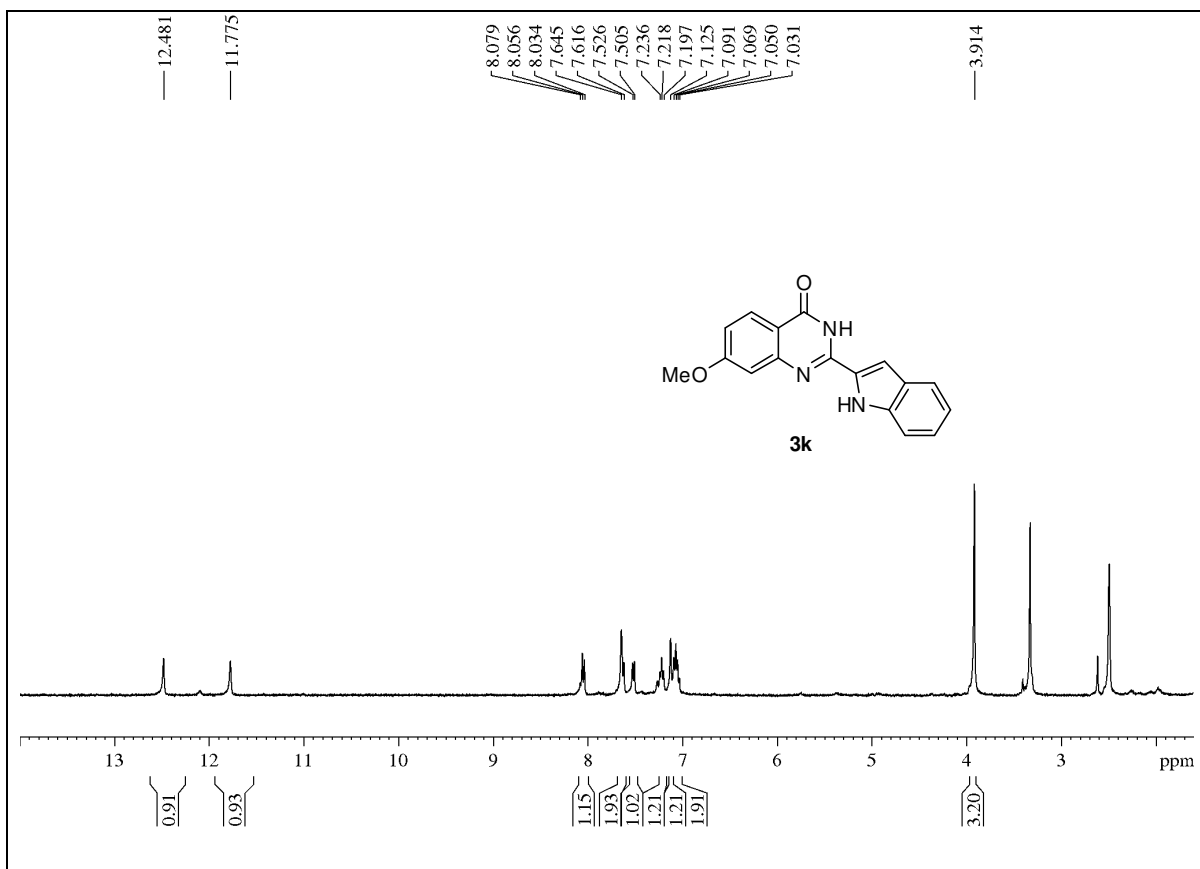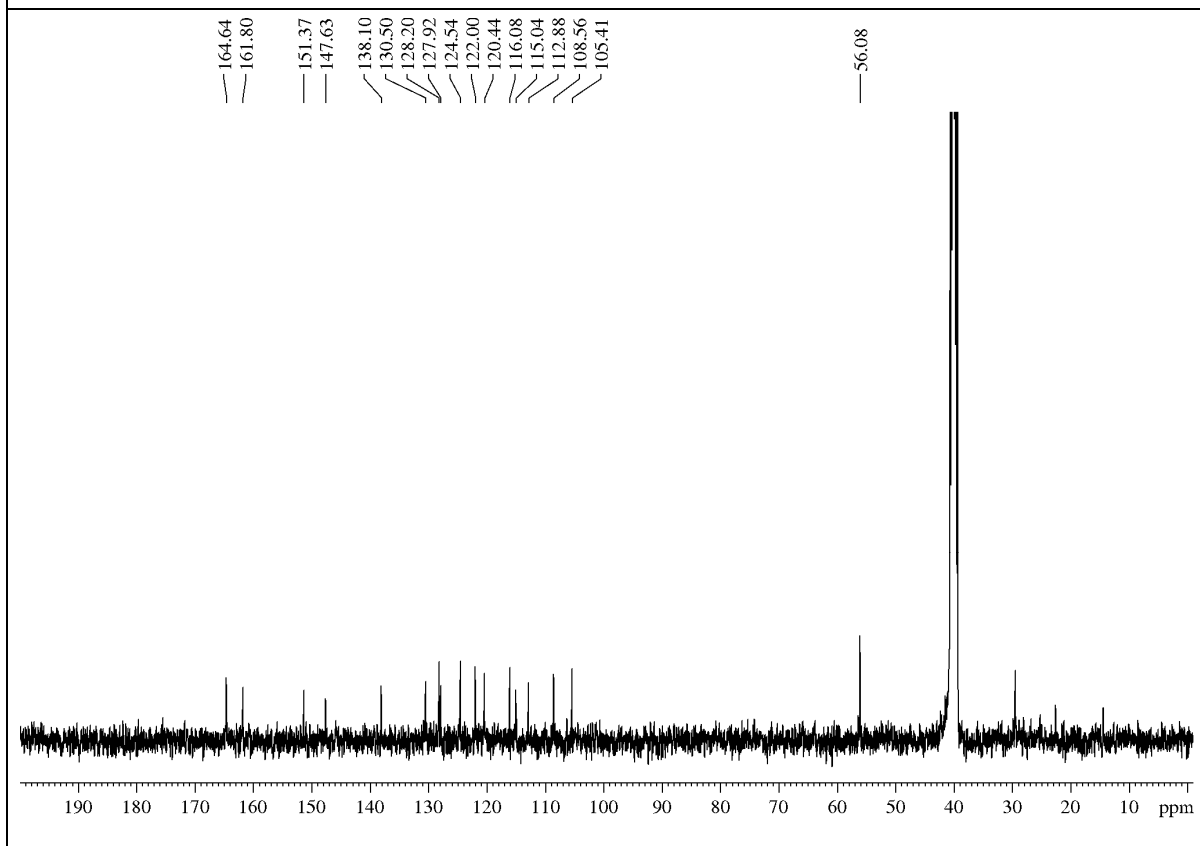



# BRUKER MAXIS HRMS REPORT

School of Chemistry  
University of Hyderabad

## Analysis Info

Analysis Name D:\Data\2015\DrNagarajan\JULY\SKG-401.d  
Method TL-P.m  
Sample Name SKG-401-DCM-MEOH  
Comment

Acquisition Date 7/2/2015 12:02:43 PM

Operator Ramu Sridhar  
Instrument maXis 10138

## Acquisition Parameter

|             |            |                       |           |                  |           |
|-------------|------------|-----------------------|-----------|------------------|-----------|
| Source Type | ESI        | Ion Polarity          | Positive  | Set Nebulizer    | 4.4 psi   |
| Focus       | Not active | Set Capillary         | 3800 V    | Set Dry Heater   | 180 °C    |
| Scan Begin  | 50 m/z     | Set End Plate Offset  | -500 V    | Set Dry Gas      | 4.0 l/min |
| Scan End    | 600 m/z    | Set Collision Cell RF | 350.0 Vpp | Set Divert Valve | Waste     |

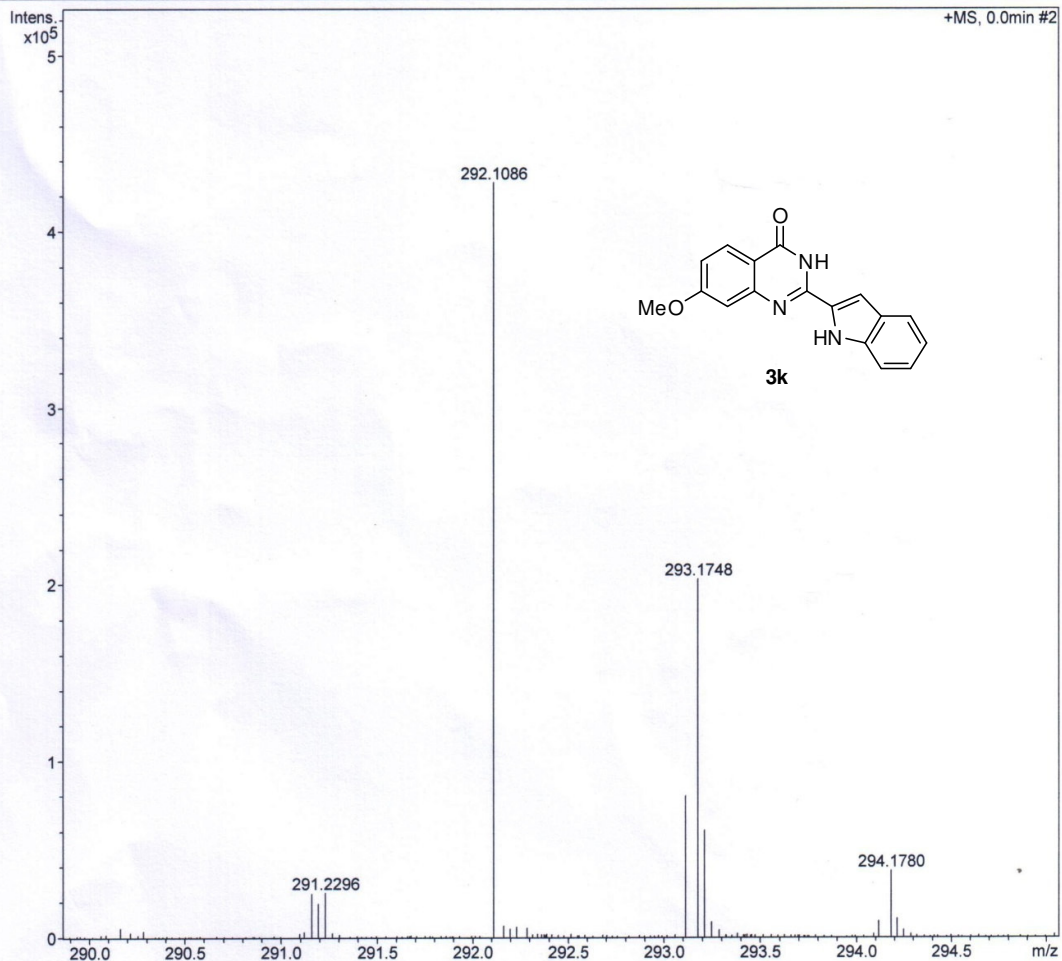

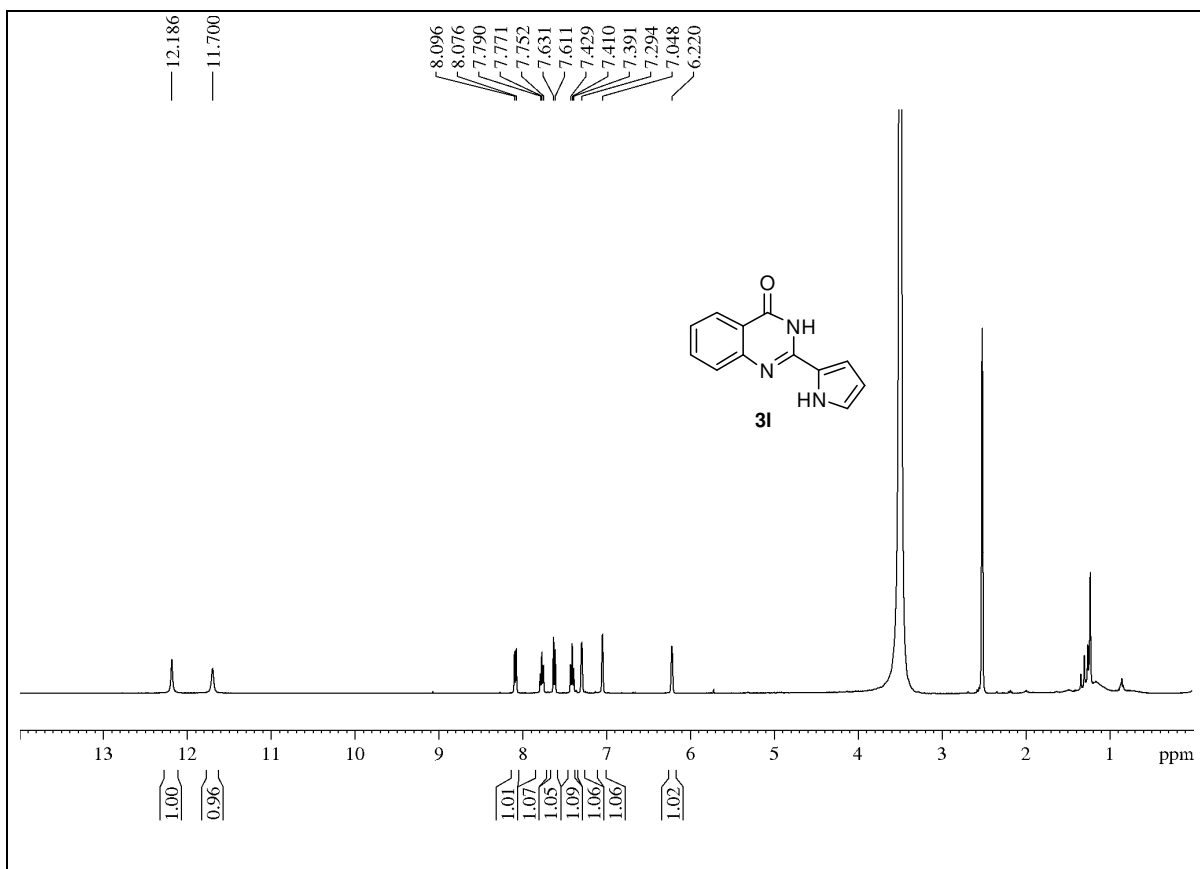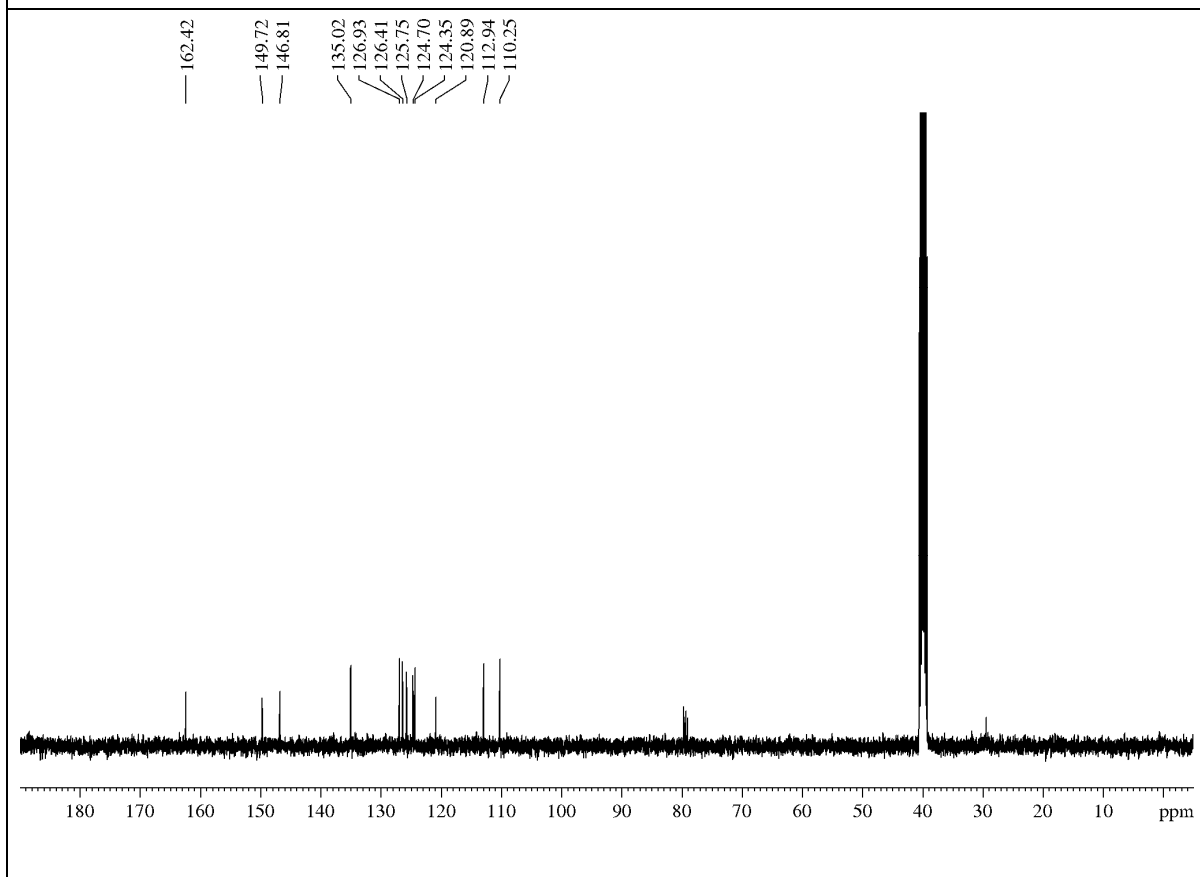



LCMS-2010A DATA REPORT  
SCHOOL OF CHEMISTRY  
UNIVERSITY OF HYDERABAD

User : Admin  
Sample : SKG-321  
Inj. Volume : 5.000  
Data Name : C:\LCMSsolution\User\Data\SKG-321-APCI-POS1.qld  
Method Name : C:\LCMSsolution\User\Method\esi.qlm

MS Spectrum

Line#:1 R.Time:0.799(Scan#:48) Positive  
MassPeaks:249 BasePeak:212.05(14257197)  
RawMode:Single 0.799(48)  
BG Mode:Peak Start 0.543(33)

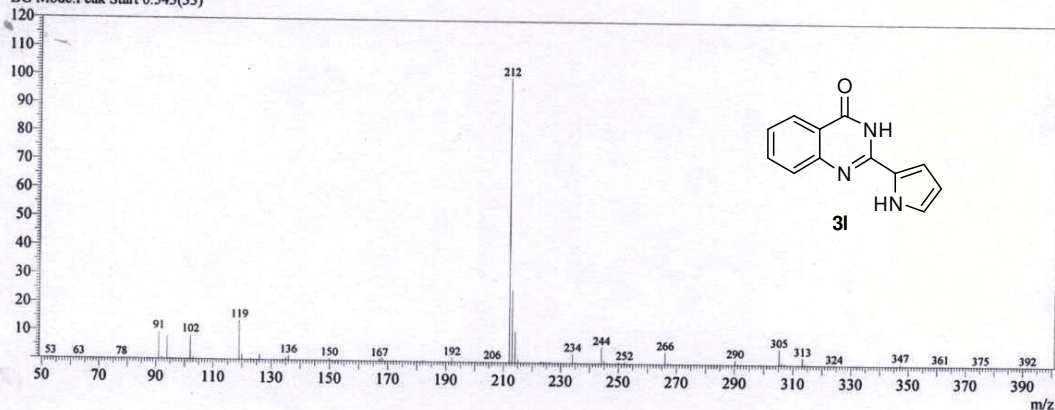

MS Peak Table

| Peak# | R.Time | I.Time | F.Time | Area      | Height   | A/H   | Mark | %Total | Name | Base m/z | Base Int. |
|-------|--------|--------|--------|-----------|----------|-------|------|--------|------|----------|-----------|
| 1     | 0.799  | 0.543  | 1.010  | 344634718 | 26479198 | 13.01 |      | 100.00 |      | 212.05   | 14257197  |
|       |        |        |        | 344634718 | 26479198 |       |      | 100.00 |      |          |           |

FLASH EA 1112 SERIES CHN REPORT  
SCHOOL OF CHEMISTRY  
UNIVERSITY OF HYDERABAD

Method filename:

Sample ID:

Analysis type:

Chromatogram filename:

Sample weight:

C:\Program Files\Thermo Finnigan\Eager 300-for EA1112\DATA\Sys\_data\_ex

SKG-321 (# 163)

UnkNown

UNK-18022015-23.dat

1.153

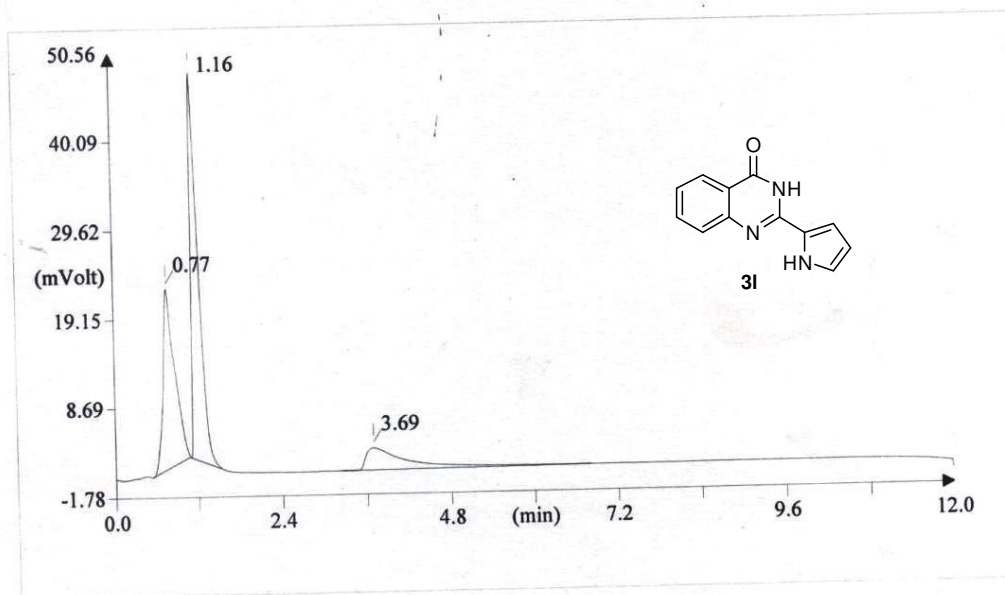

| Element Name | Element % | Ret. Time |
|--------------|-----------|-----------|
| Nitrogen     | 19.78     | 0.77      |
| Carbon       | 68.15     | 1.16      |
| Hydrogen     | 4.36      | 3.69      |

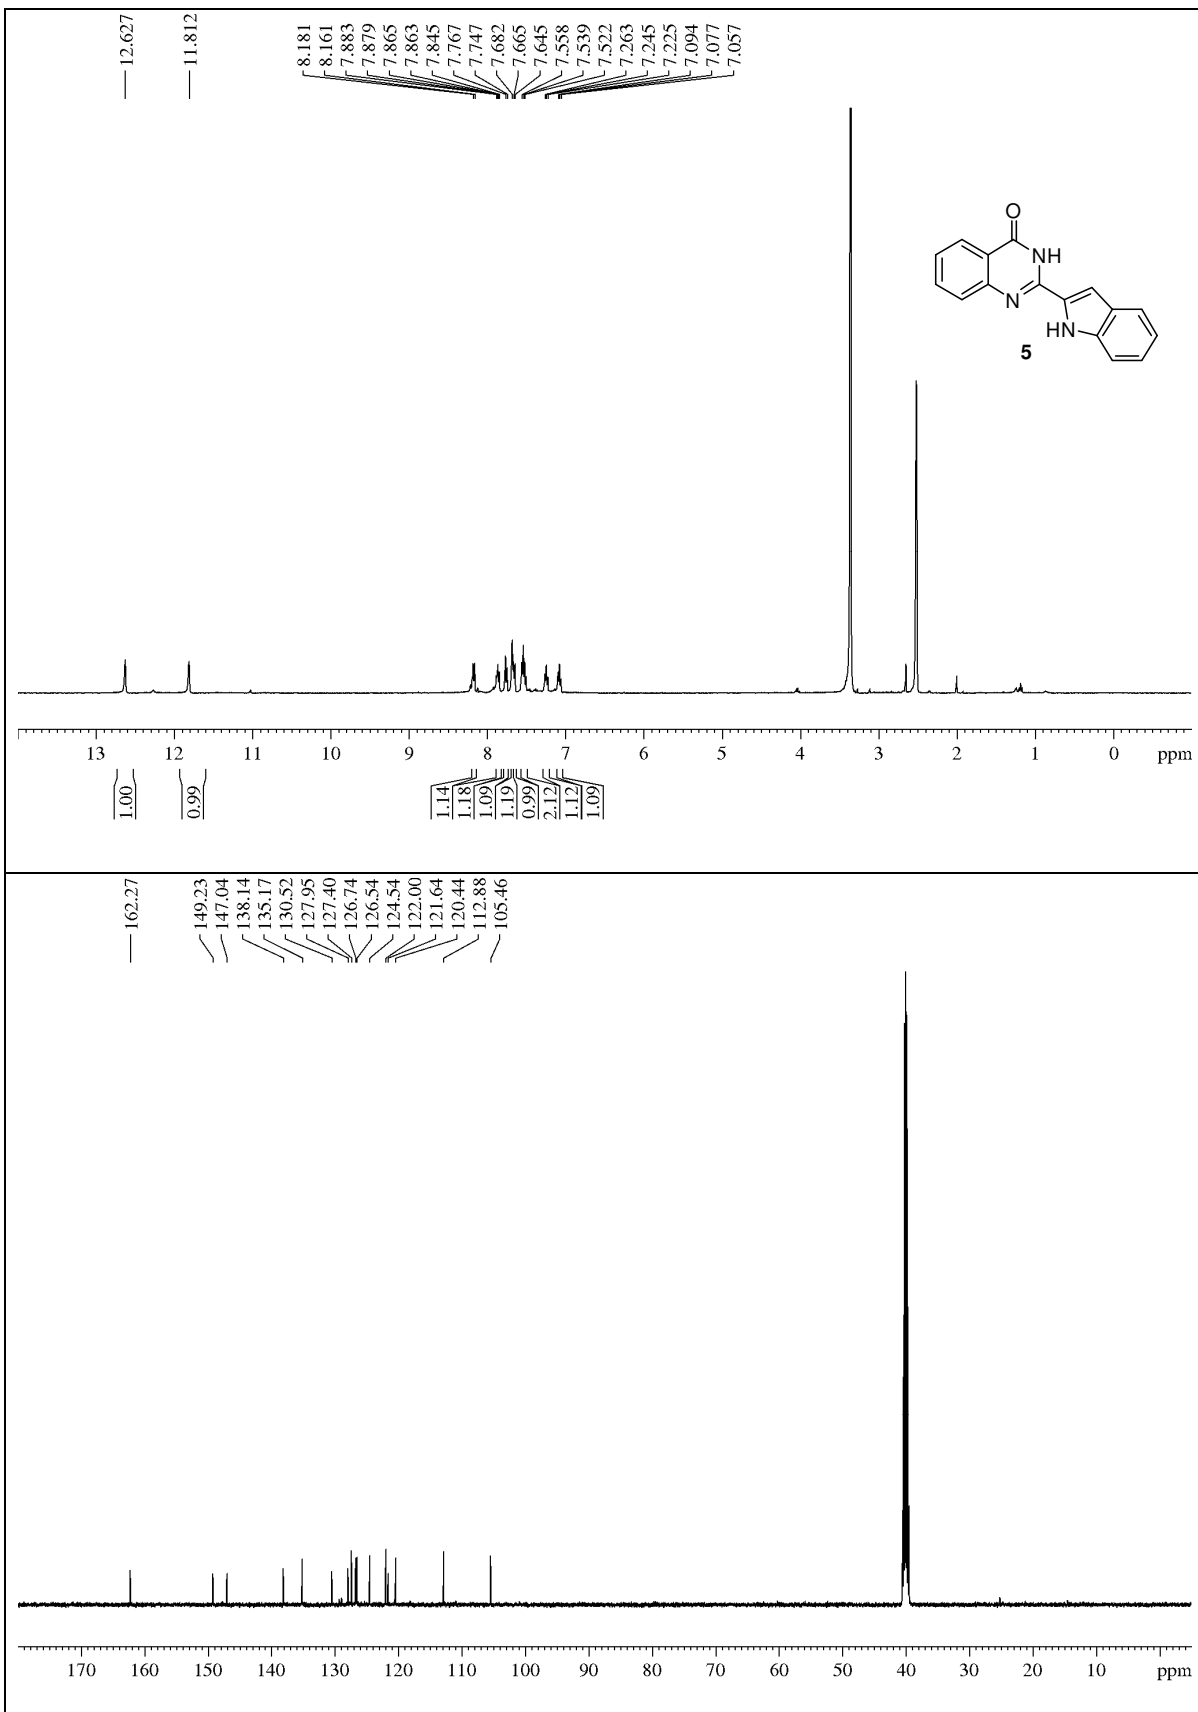

# BRUKER MAXIS HRMS REPORT

School of Chemistry  
University of Hyderabad

## Analysis Info

Analysis Name D:\Data\2015\DrNagarajan\JULY\SKG-BOU-R.d  
Method tune\_low\_Pos.m  
Sample Name SKG-BOU-DCM-MEOH  
Comment

Acquisition Date 7/20/2015 12:29:37 PM

Operator Ramu Sridhar  
Instrument maXis 10138

## Acquisition Parameter

|             |            |                       |           |                  |           |
|-------------|------------|-----------------------|-----------|------------------|-----------|
| Source Type | ESI        | Ion Polarity          | Positive  | Set Nebulizer    | 4.4 psi   |
| Focus       | Not active | Set Capillary         | 4500 V    | Set Dry Heater   | 180 °C    |
| Scan Begin  | 50 m/z     | Set End Plate Offset  | -500 V    | Set Dry Gas      | 4.0 l/min |
| Scan End    | 1500 m/z   | Set Collision Cell RF | 350.0 Vpp | Set Divert Valve | Waste     |

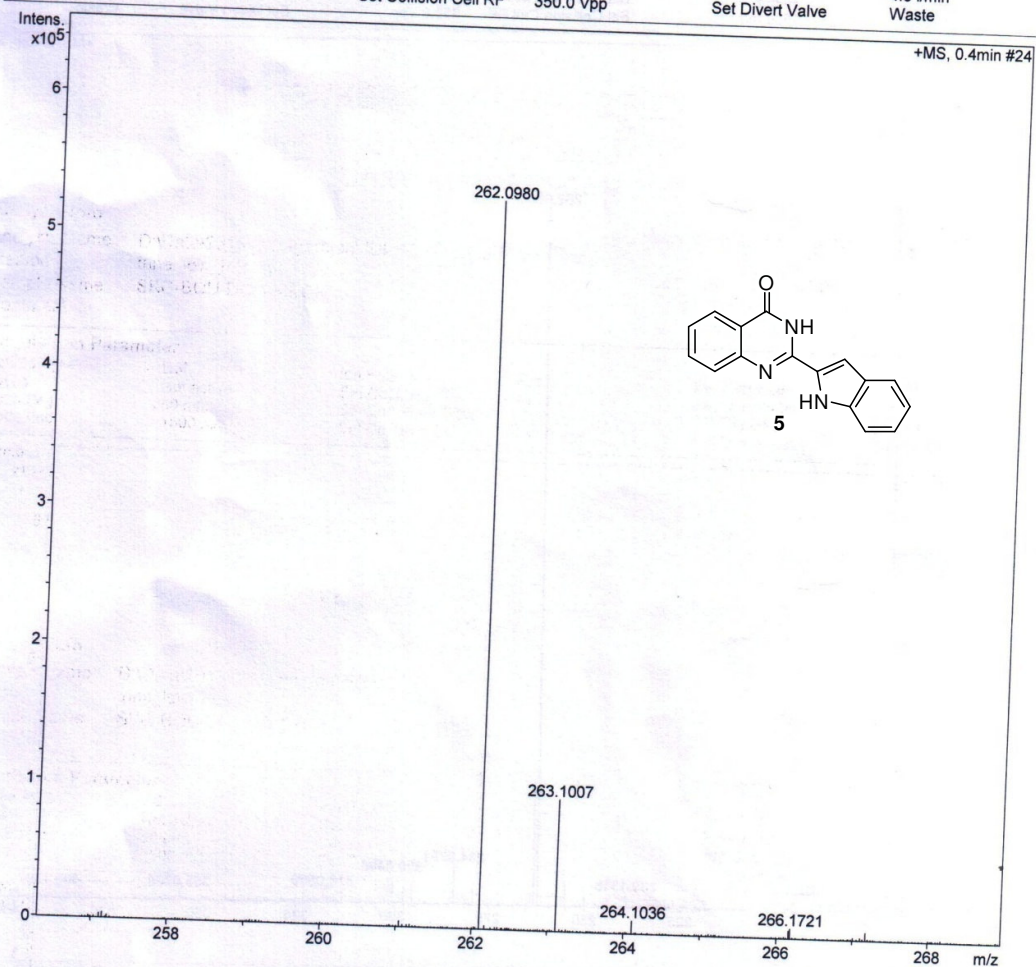

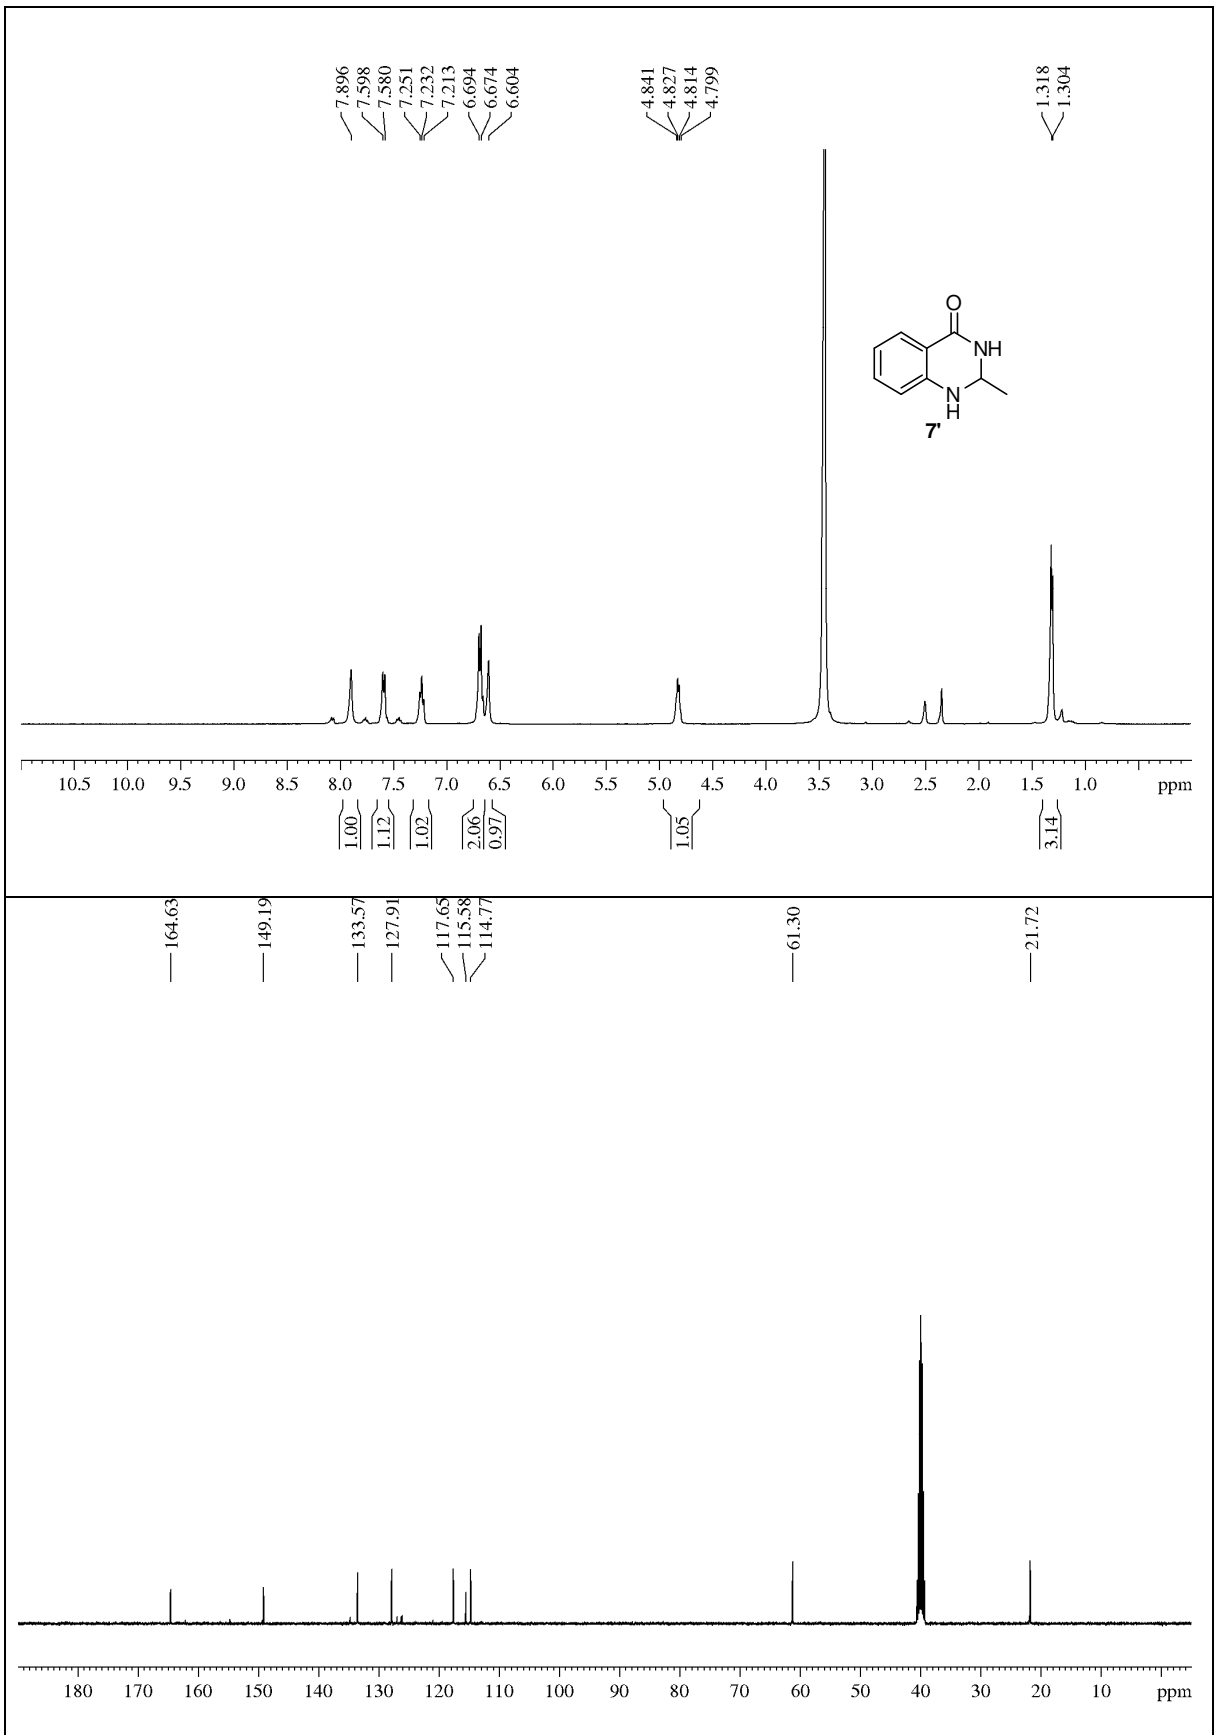



# BRUKER MAXIS HRMS REPORT

School of Chemistry  
University of Hyderabad

## Analysis Info

Analysis Name D:\Data\2015\DrNagarajan\mar\SKG-614.d  
Method tune\_low\_Pos.m  
Sample Name SKG-614DCM-MEOH  
Comment

Acquisition Date 3/5/2015 11:02:02 AM

Operator Ramu Sridhar  
Instrument maXis 10138

## Acquisition Parameter

|             |            |                       |           |                  |            |
|-------------|------------|-----------------------|-----------|------------------|------------|
| Source Type | ESI        | Ion Polarity          | Positive  | Set Nebulizer    | 10.0 psi   |
| Focus       | Not active | Set Capillary         | 4500 V    | Set Dry Heater   | 180 °C     |
| Scan Begin  | 50 m/z     | Set End Plate Offset  | -500 V    | Set Dry Gas      | 10.0 l/min |
| Scan End    | 1500 m/z   | Set Collision Cell RF | 350.0 Vpp | Set Divert Valve | Waste      |

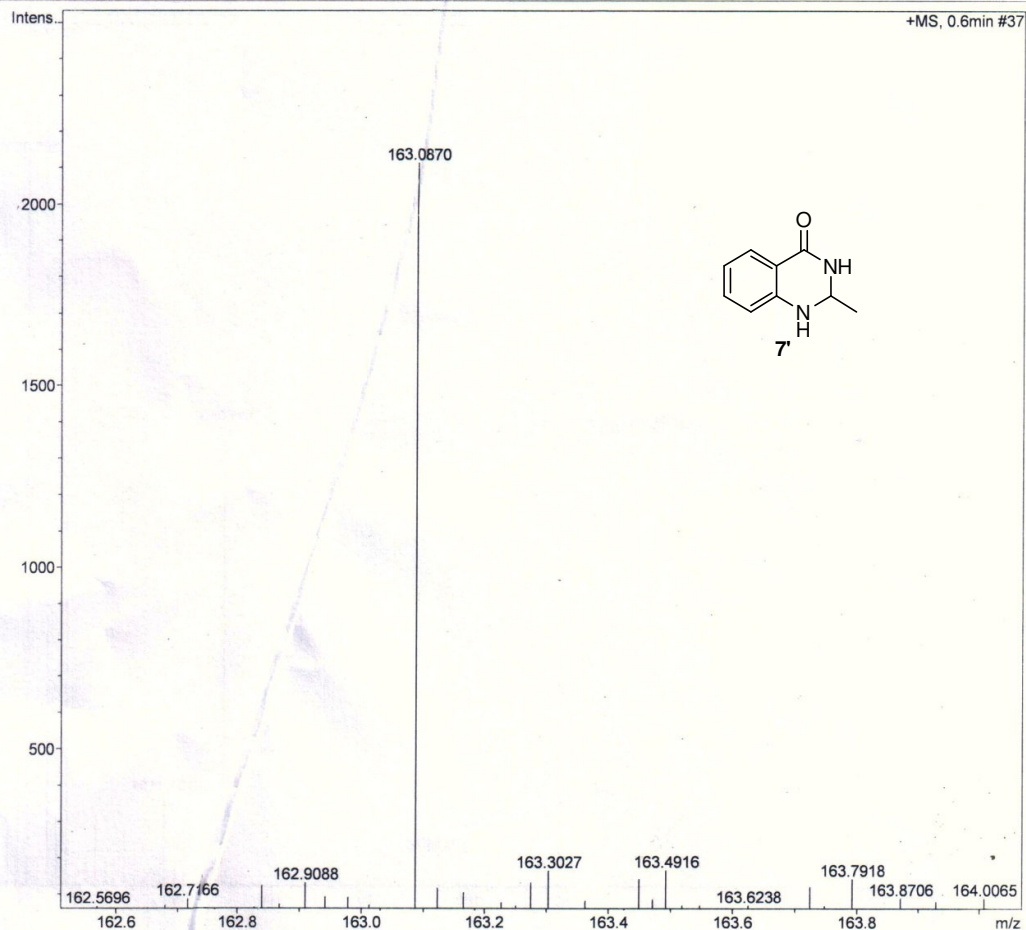

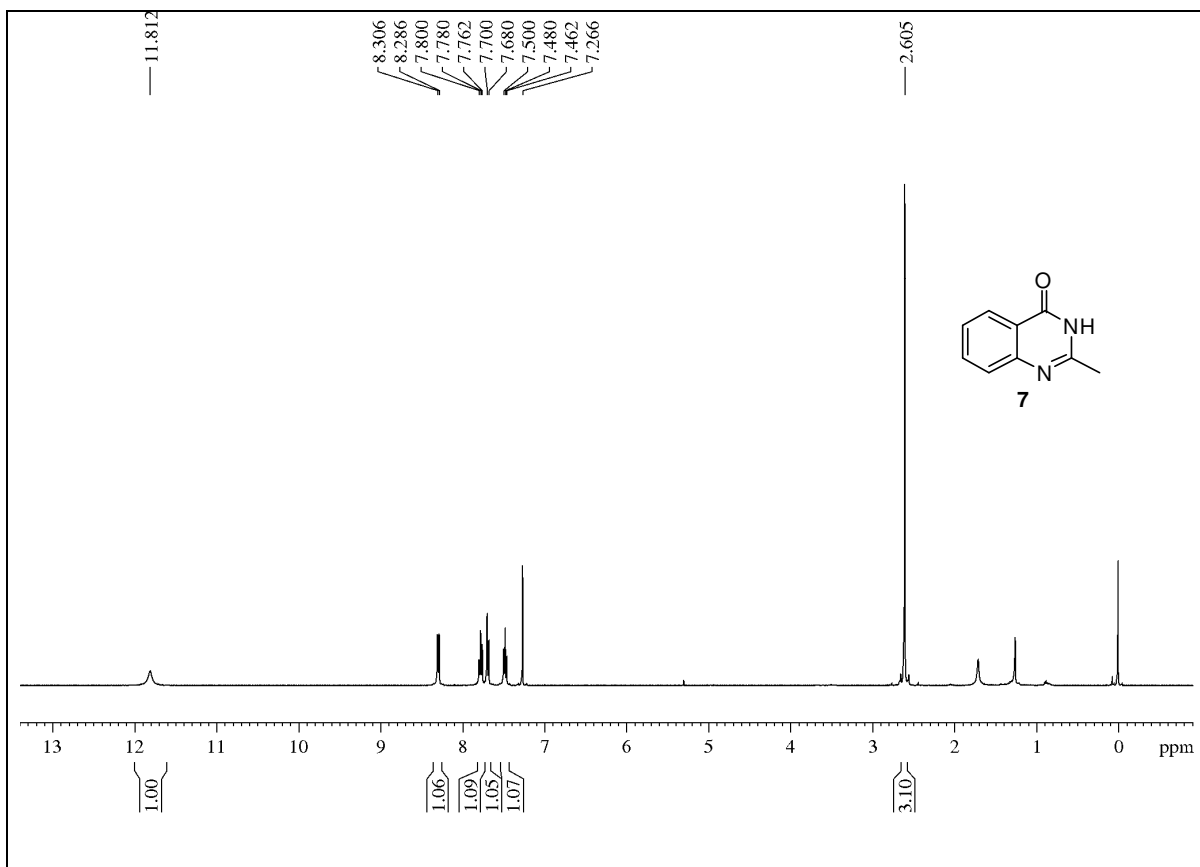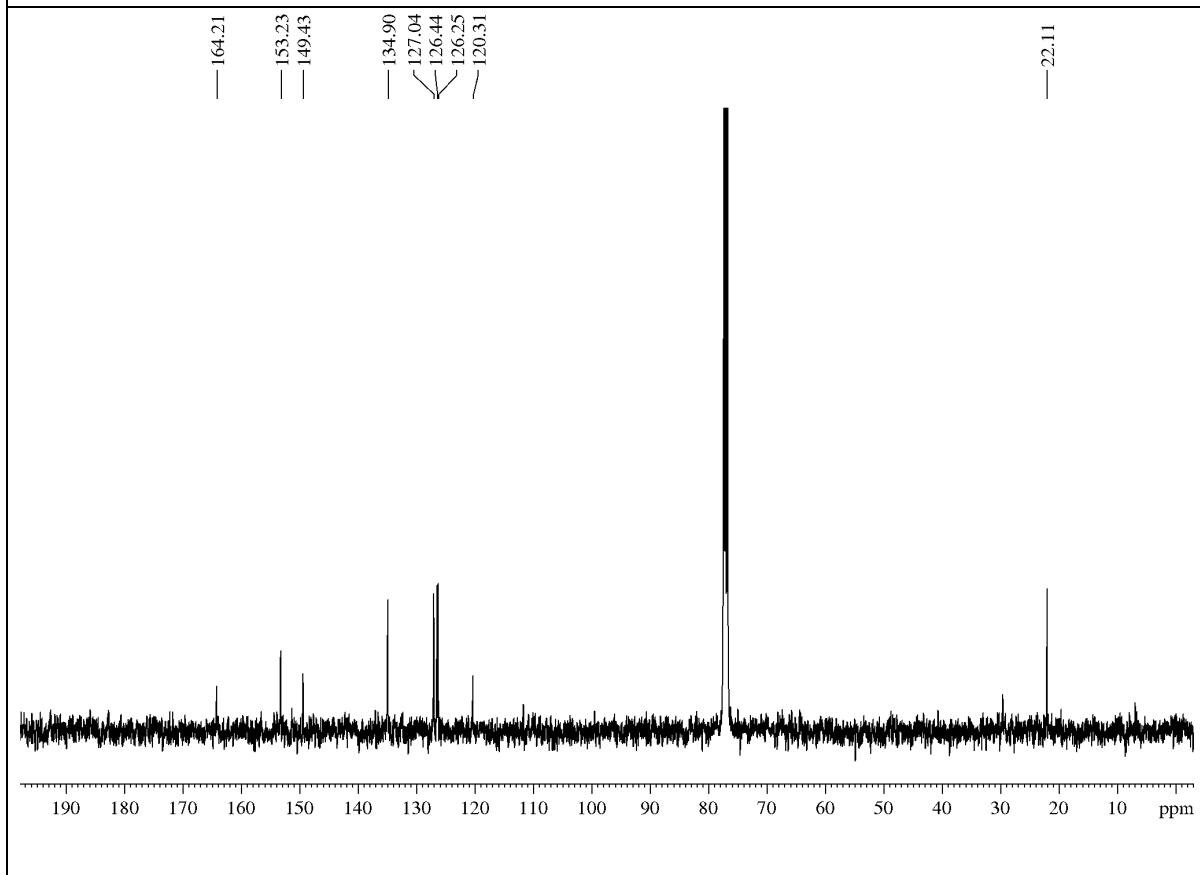



# BRUKER MAXIS HRMS REPORT

School of Chemistry  
University of Hyderabad

## Analysis Info

Analysis Name D:\Data\2015\DrNagarajan\mar\SKG-625.d  
Method tune\_low\_Pos.m  
Sample Name SKG-625-DCM-MEOH  
Comment

Acquisition Date 3/5/2015 10:52:18 AM

Operator Ramu Sridhar  
Instrument maXis 10138

## Acquisition Parameter

|             |            |                       |           |                  |           |
|-------------|------------|-----------------------|-----------|------------------|-----------|
| Source Type | ESI        | Ion Polarity          | Positive  | Set Nebulizer    | 6.0 psi   |
| Focus       | Not active | Set Capillary         | 4200 V    | Set Dry Heater   | 180 °C    |
| Scan Begin  | 50 m/z     | Set End Plate Offset  | -500 V    | Set Dry Gas      | 6.0 l/min |
| Scan End    | 1500 m/z   | Set Collision Cell RF | 350.0 Vpp | Set Divert Valve | Waste     |

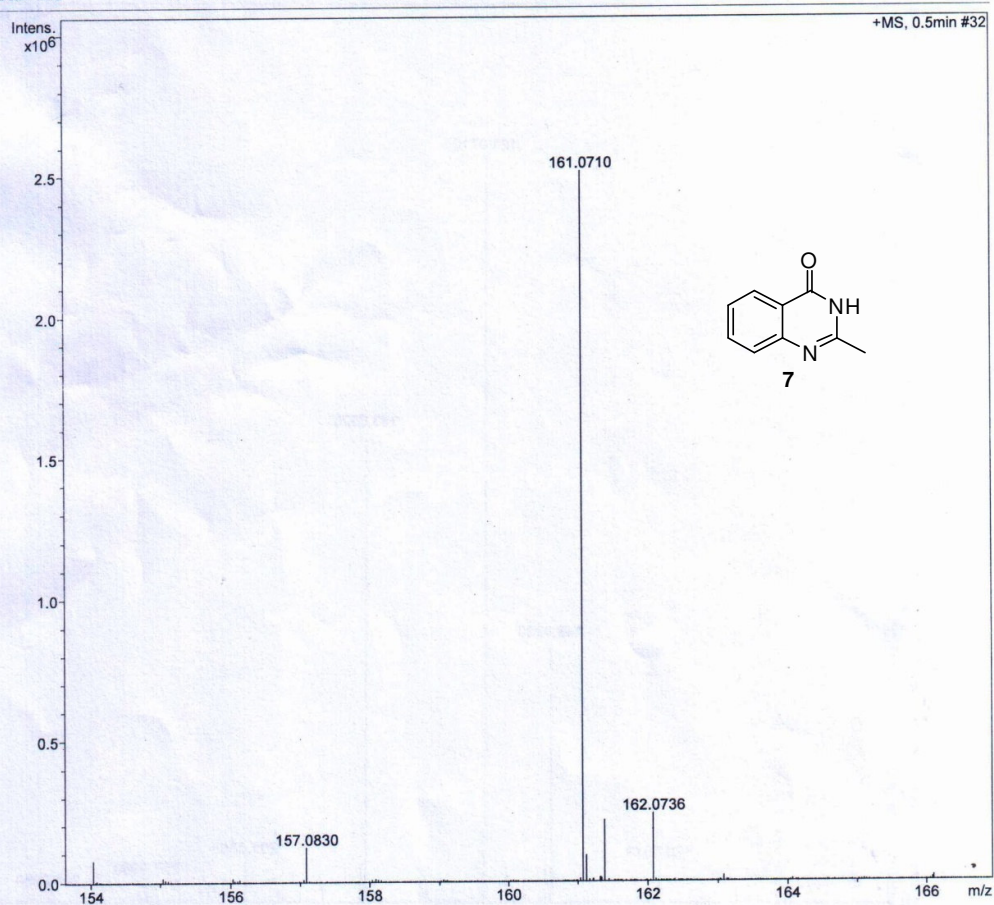

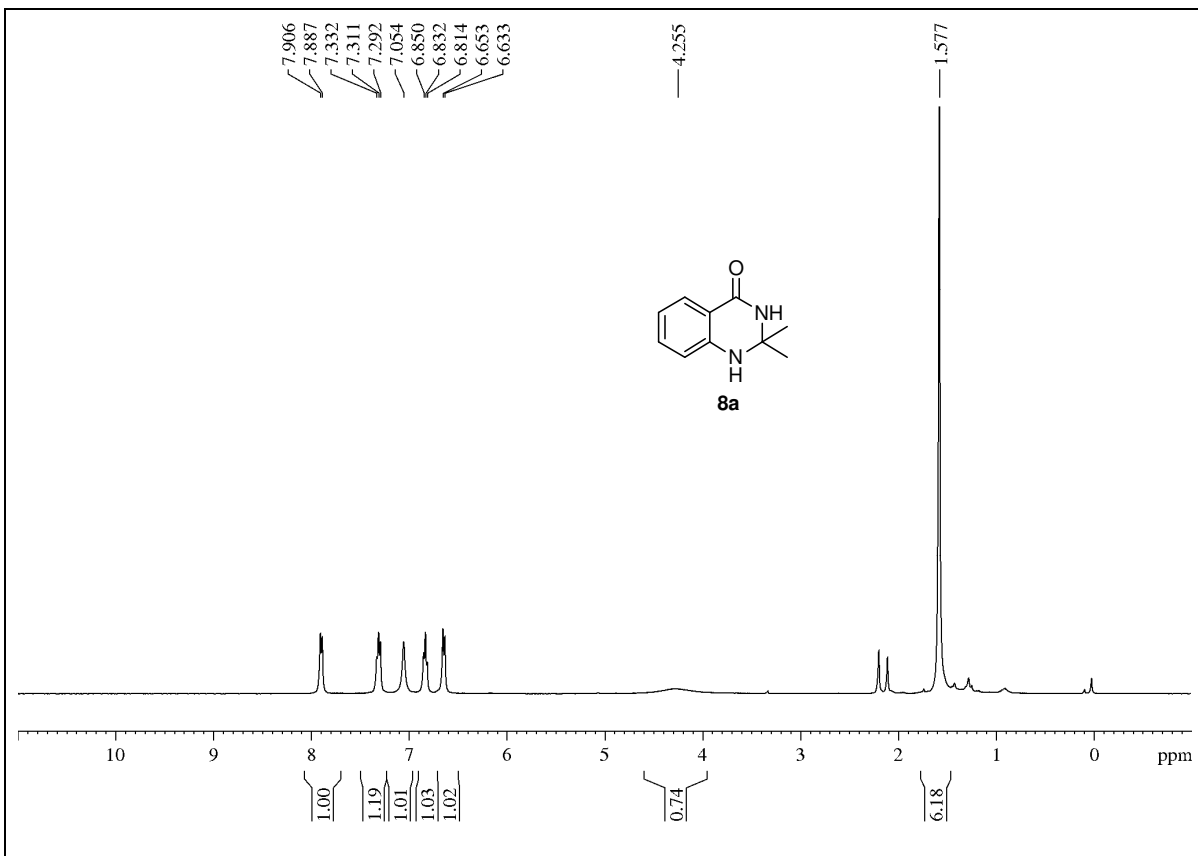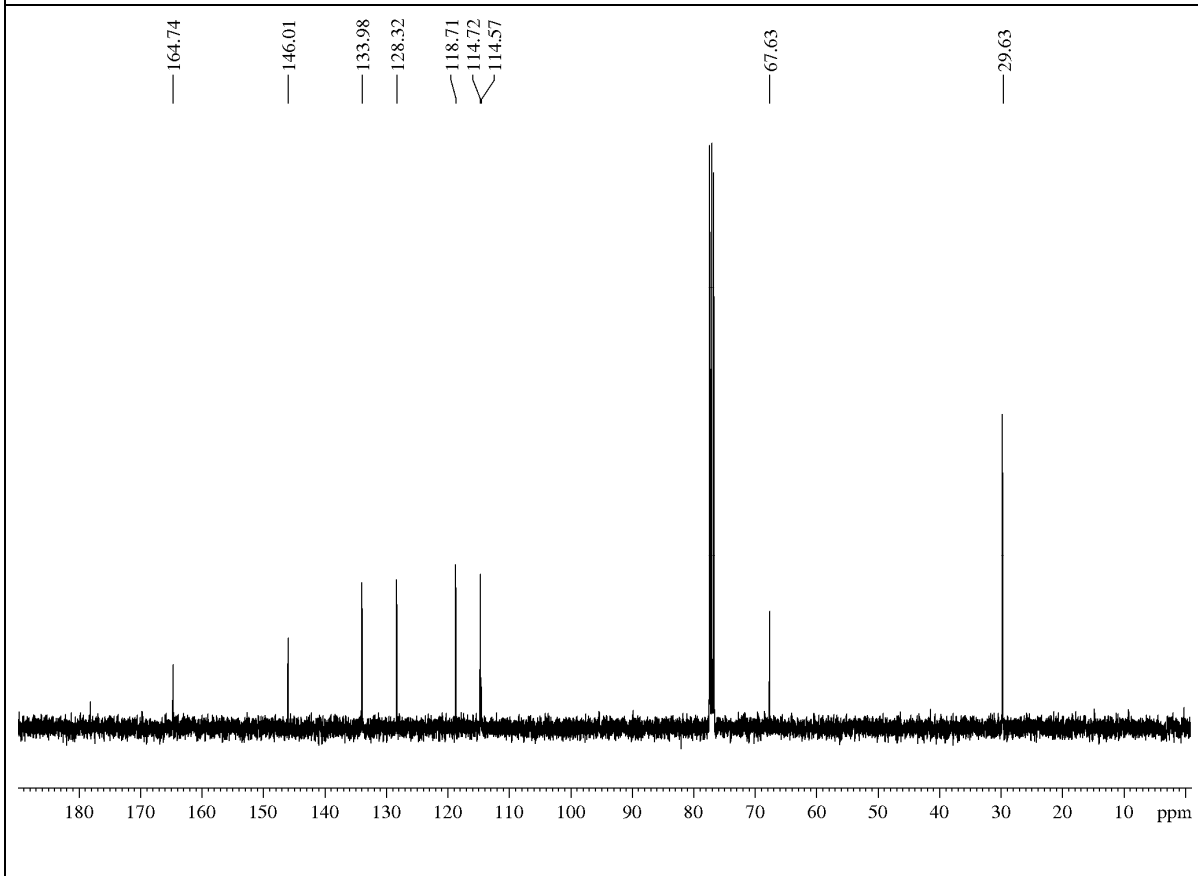

LCMS-2010A DATA REPORT  
SCHOOL OF CHEMISTRY  
UNIVERSITY OF HYDERABAD

User : Admin  
Sample : SKG-676  
Inj. Volume : 5.000  
Data Name : C:\LCMSsolution\User\Data\SKG-676-APCI-POS1.qld  
Method Name : C:\LCMSsolution\User\Method\esi.qlm

MS Spectrum

Line#: 1 R.Time: 0.782(Scan#: 47) Positive  
MassPeaks: 85 BasePeak: 177.15(31741)  
RawMode: Single 0.782(47)  
BG Mode: Peak Start 0.593(36)

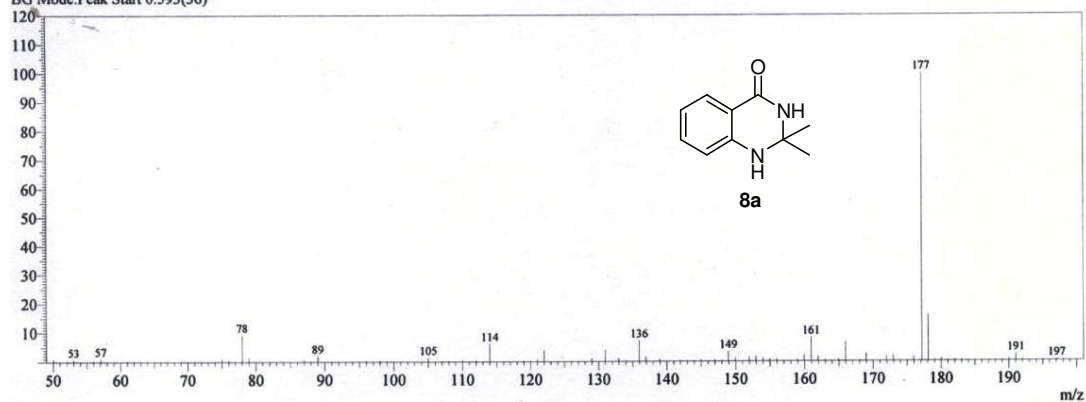

| Peak# | R.Time | I.Time | F.Time | Area    | Height | A/H  | Mark | %Total | Name | Base m/z | Base Int. |
|-------|--------|--------|--------|---------|--------|------|------|--------|------|----------|-----------|
| 1     | 0.782  | 0.593  | 0.943  | 2487266 | 253416 | 9.81 |      | 100.00 |      | 177.15   | 31741     |
|       |        |        |        | 2487266 | 253416 |      |      | 100.00 |      |          |           |

FLASH EA 1112 SERIES CHN REPORT  
SCHOOL OF CHEMISTRY  
UNIVERSITY OF HYDERABAD

Method filename:

Sample ID:

Analysis type:

Chromatogram filename:

Sample weight:

C:\Program Files\Thermo Finnigan\Eager 300 for EA1112\DATA\Sys\_data\_ex  
SKG-676 (# 162)  
UnkNown  
UNK-18022015-22.dat  
1.119

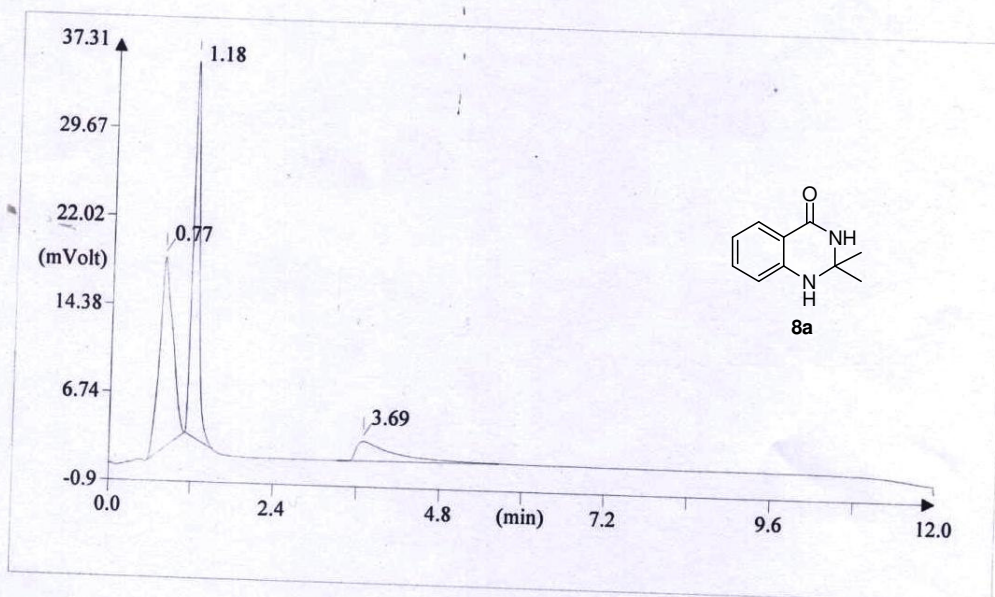

| Element Name | Element % | Ret. Time |
|--------------|-----------|-----------|
| Nitrogen     | 15.82     | 0.77      |
| Carbon       | 68.26     | 1.18      |
| Hydrogen     | 6.81      | 3.69      |

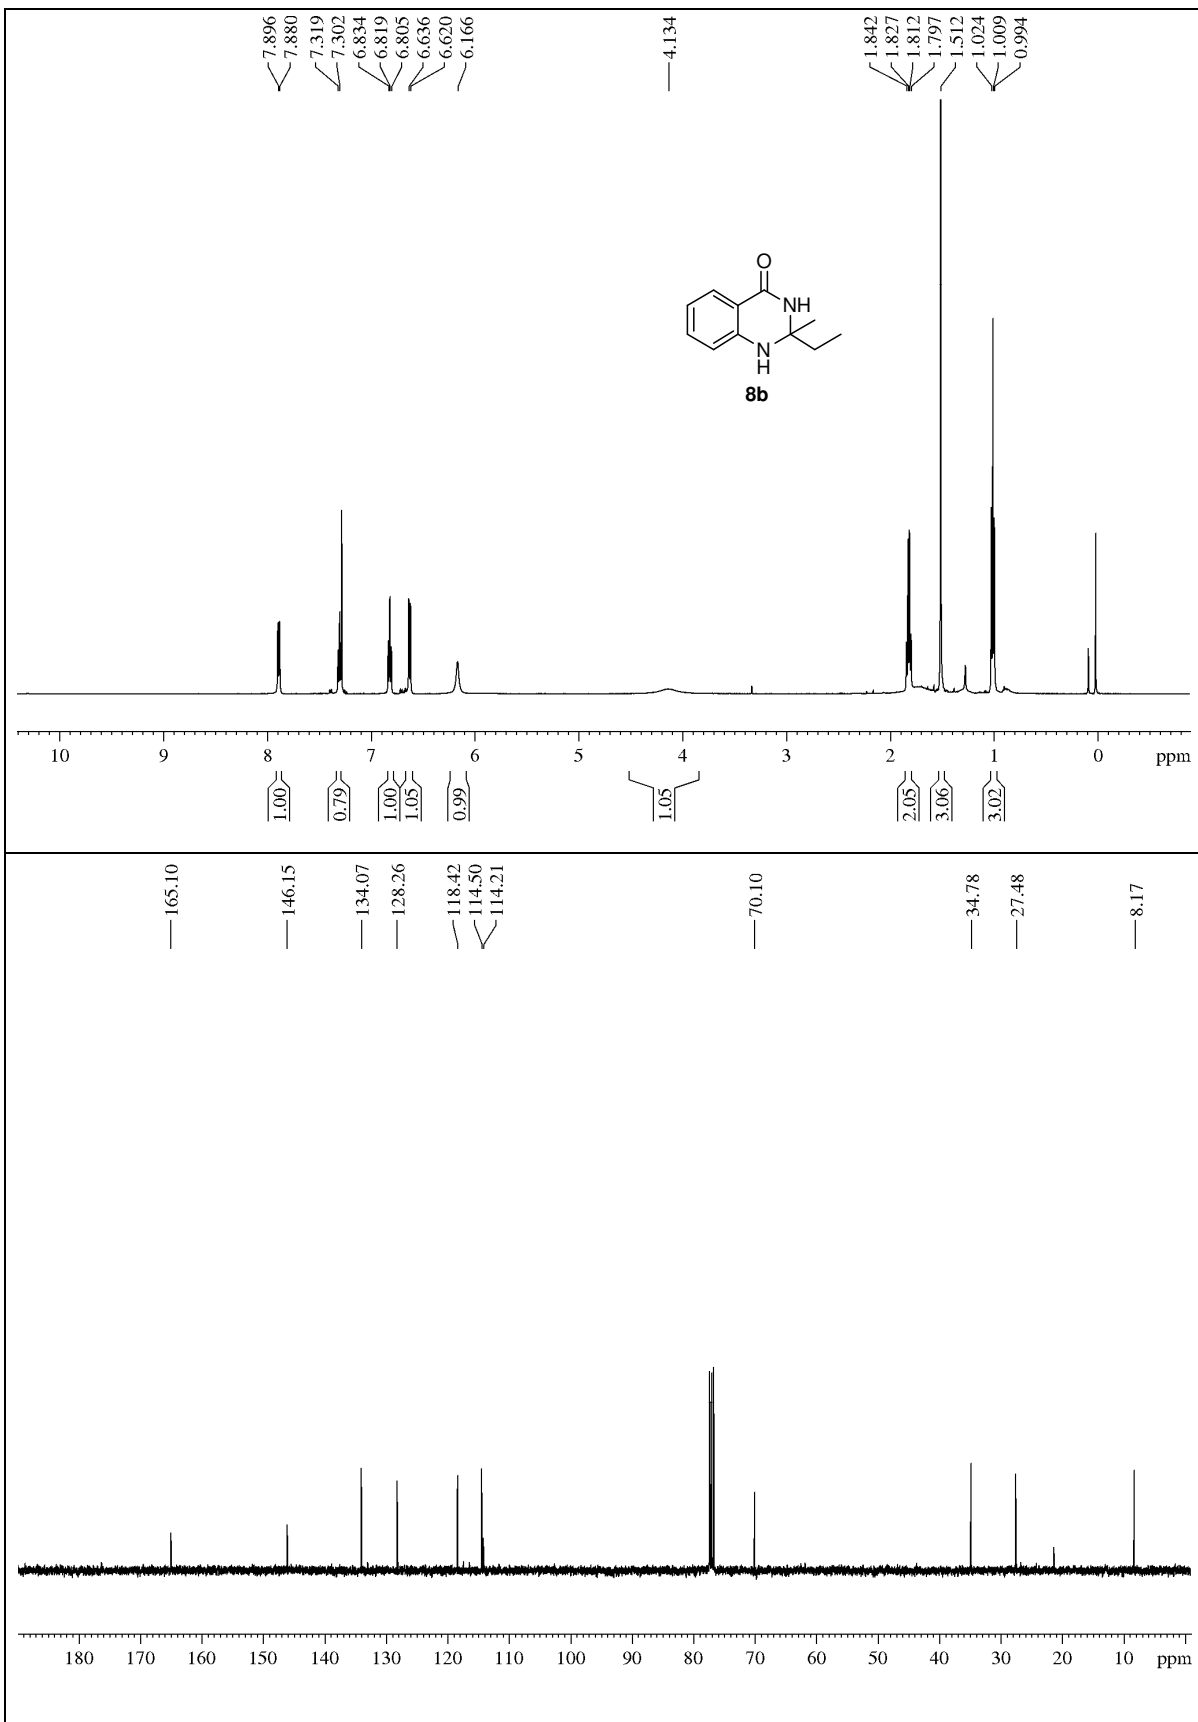



# LCMS-2010A DATA REPORT SCHOOL OF CHEMISTRY UNIVERSITY OF HYDERABAD

User : Admin  
 Sample : SKG-675  
 Inj. Volume : 5.000  
 Data Name : C:\LCMSsolution\User\Data\SKG-675-APCI-POS1.qld  
 Method Name : C:\LCMSsolution\User\Method\esi.qlm

MS Spectrum

Line#:1 R.Time:0.780(Scan#:47) Positive  
 MassPeaks:108 BasePeak:191.05(10128940)  
 RawMode:Single 0.780(47)  
 BG Mode:Peak Start 0.543(33)

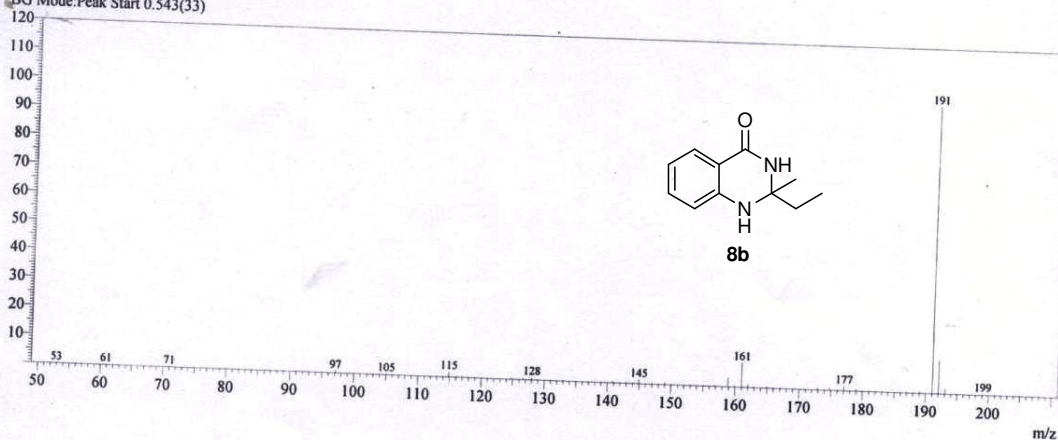

| Peak# | R. Time | I. Time | F. Time | Area      | Height   | A/H   | Mark | %Total | Name | Base m/z | Base Int. |
|-------|---------|---------|---------|-----------|----------|-------|------|--------|------|----------|-----------|
| 1     | 0.780   | 0.543   | 1.043   | 240182538 | 19357889 | 12.40 |      | 100.00 |      | 191.05   | 10128940  |
|       |         |         |         | 240182538 | 19357889 |       |      | 100.00 |      |          |           |

FLASH EA 1112 SERIES CHN REPORT  
SCHOOL OF CHEMISTRY  
UNIVERSITY OF HYDERABAD

Method filename: C:\Program Files\Thermo Finnigan\Eager 300 for EA1112\DATA\Sys\_data\_ex  
Sample ID: SKG-675 (#161)  
Analysis type: UnkNown  
Chromatogram filename: UNK-18022015-21.dat  
Sample weight: 1.241

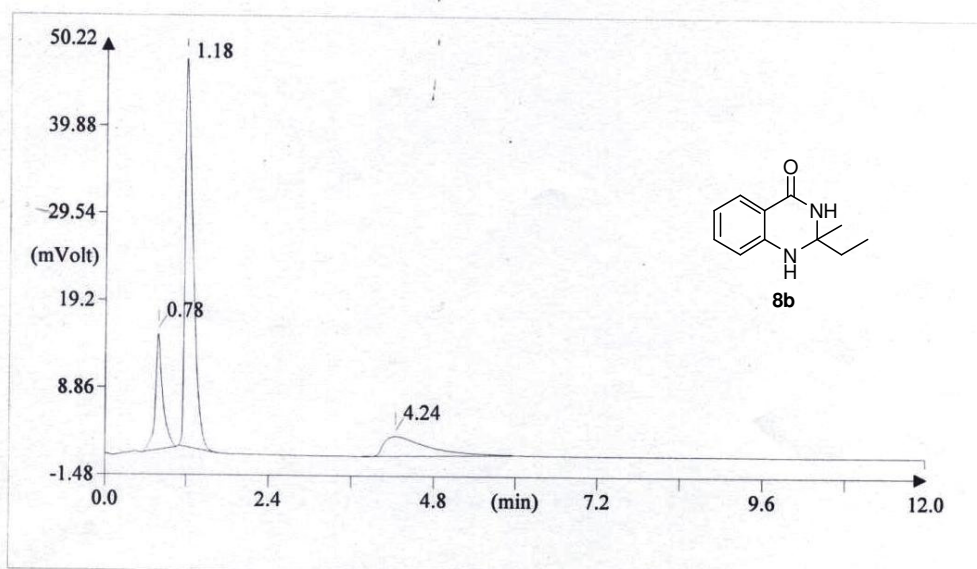

| Element Name | Element % | Ret. Time |
|--------------|-----------|-----------|
| Nitrogen     | 14.62     | 0.78      |
| Carbon       | 69.56     | 1.18      |
| Hydrogen     | 7.35      | 4.24      |



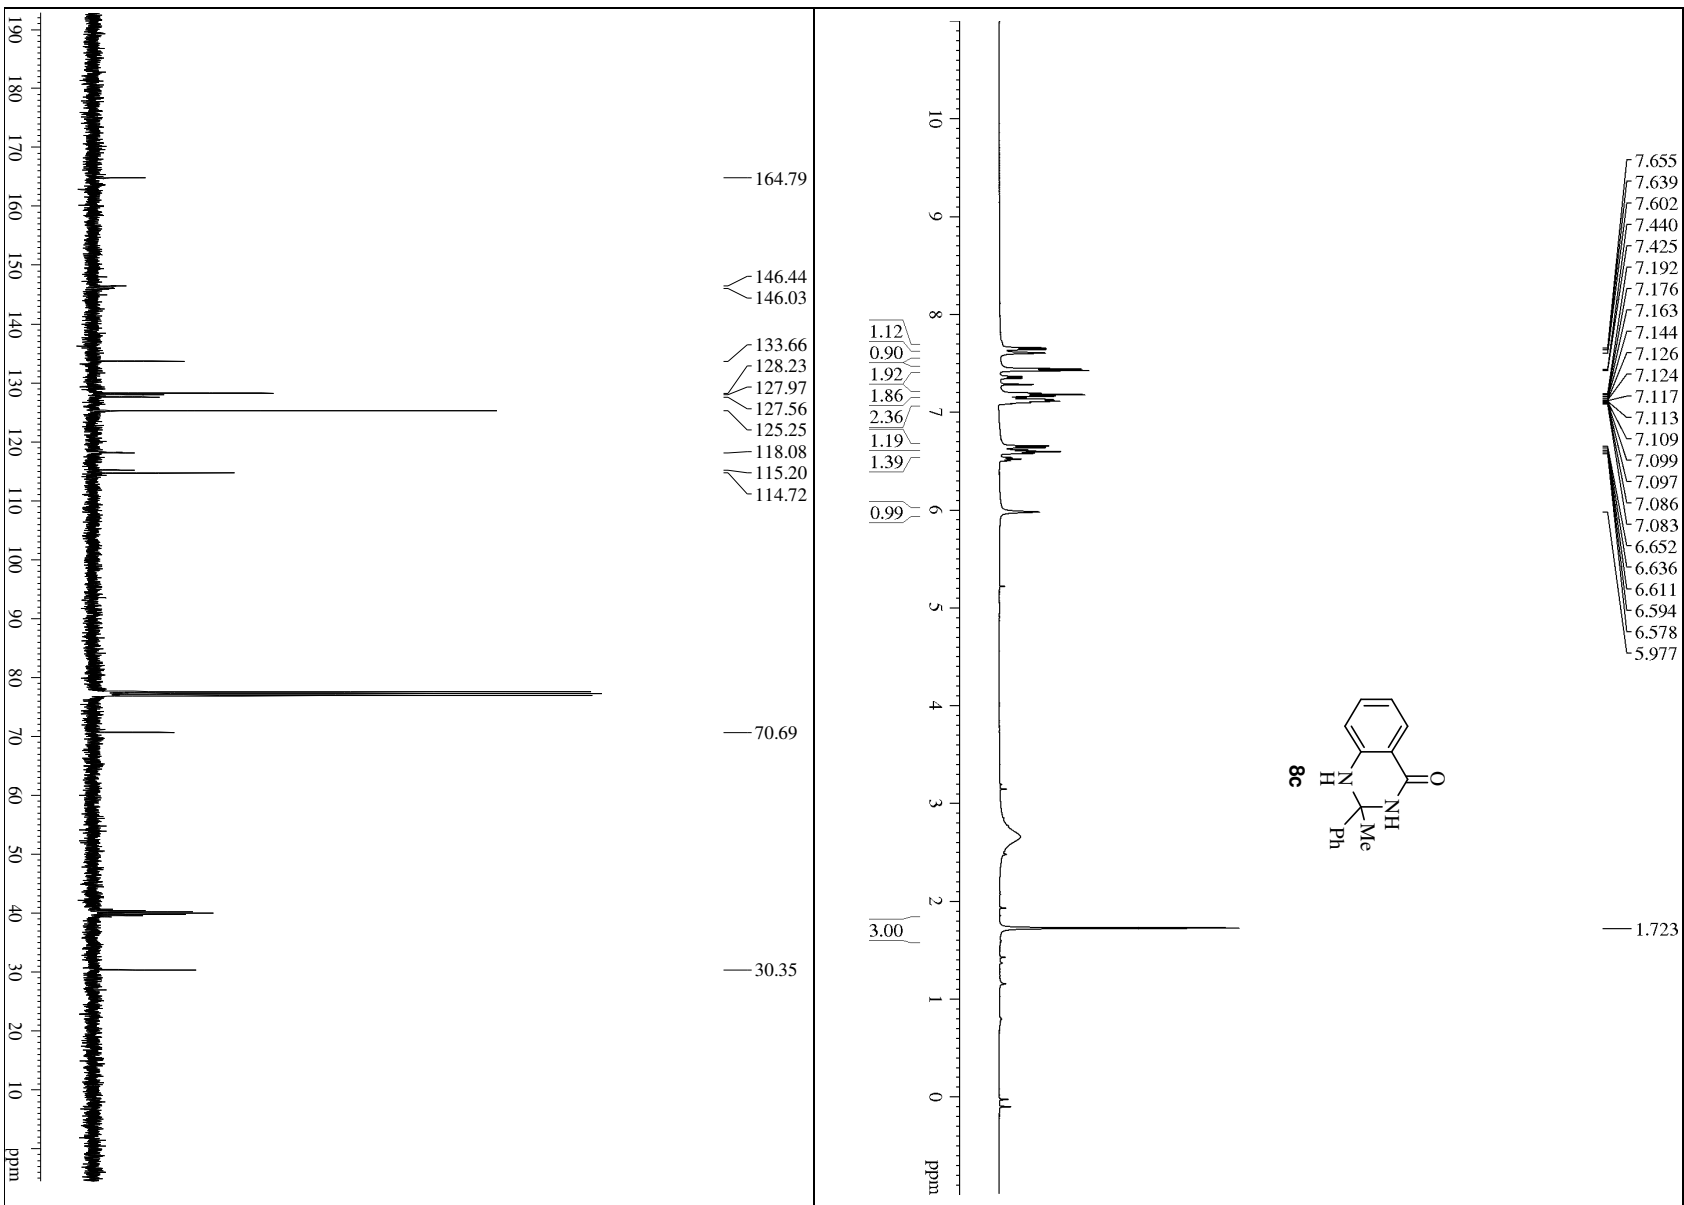

# BRUKER MAXIS HRMS REPORT

School of Chemistry  
University of Hyderabad

## Analysis Info

Analysis Name D:\Data\2015\DrNagarajan\JULY\SKG-724.d  
Method tune\_low.m  
Sample Name SKG-724-DCM-MEOH  
Comment

Acquisition Date 7/2/2015 11:48:30 AM

Operator Ramu Sridhar  
Instrument maXis 10138

## Acquisition Parameter

|             |            |                       |           |                  |           |
|-------------|------------|-----------------------|-----------|------------------|-----------|
| Source Type | ESI        | Ion Polarity          | Positive  | Set Nebulizer    | 6.0 psi   |
| Focus       | Not active | Set Capillary         | 4200 V    | Set Dry Heater   | 180 °C    |
| Scan Begin  | 50 m/z     | Set End Plate Offset  | -500 V    | Set Dry Gas      | 6.0 l/min |
| Scan End    | 1700 m/z   | Set Collision Cell RF | 150.0 Vpp | Set Divert Valve | Waste     |

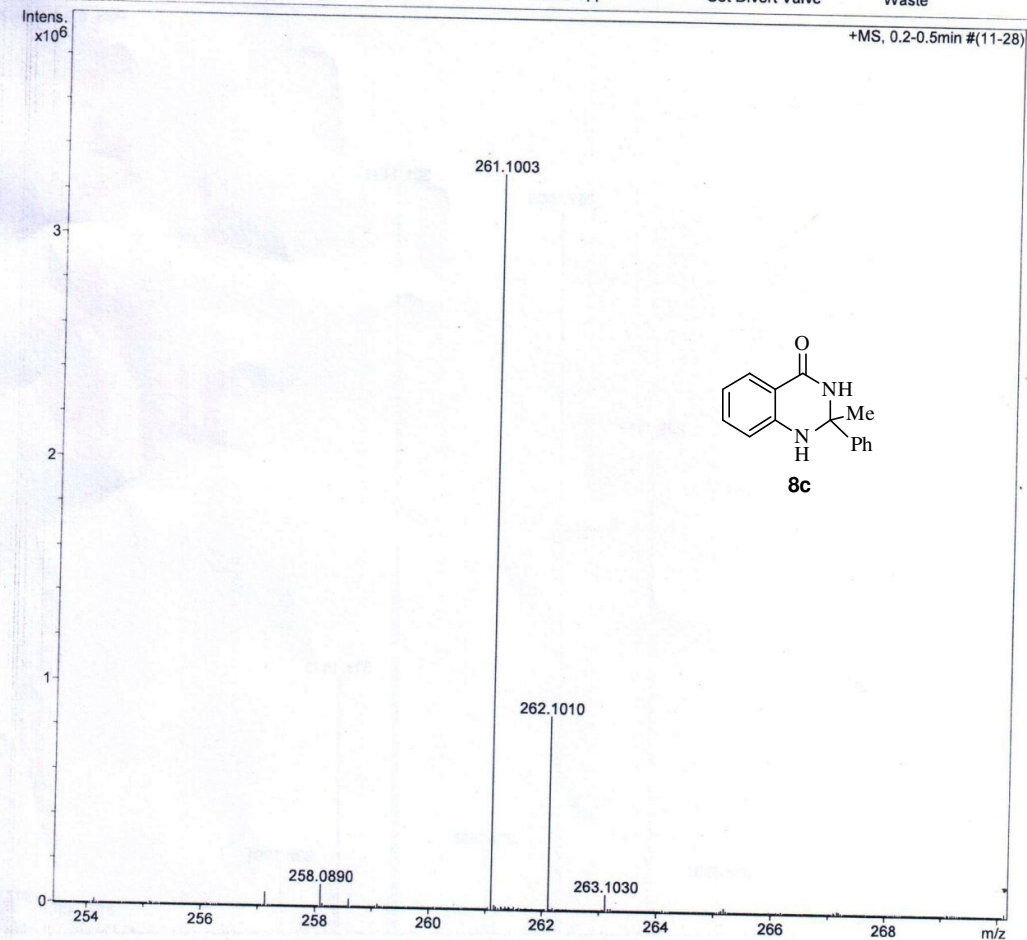

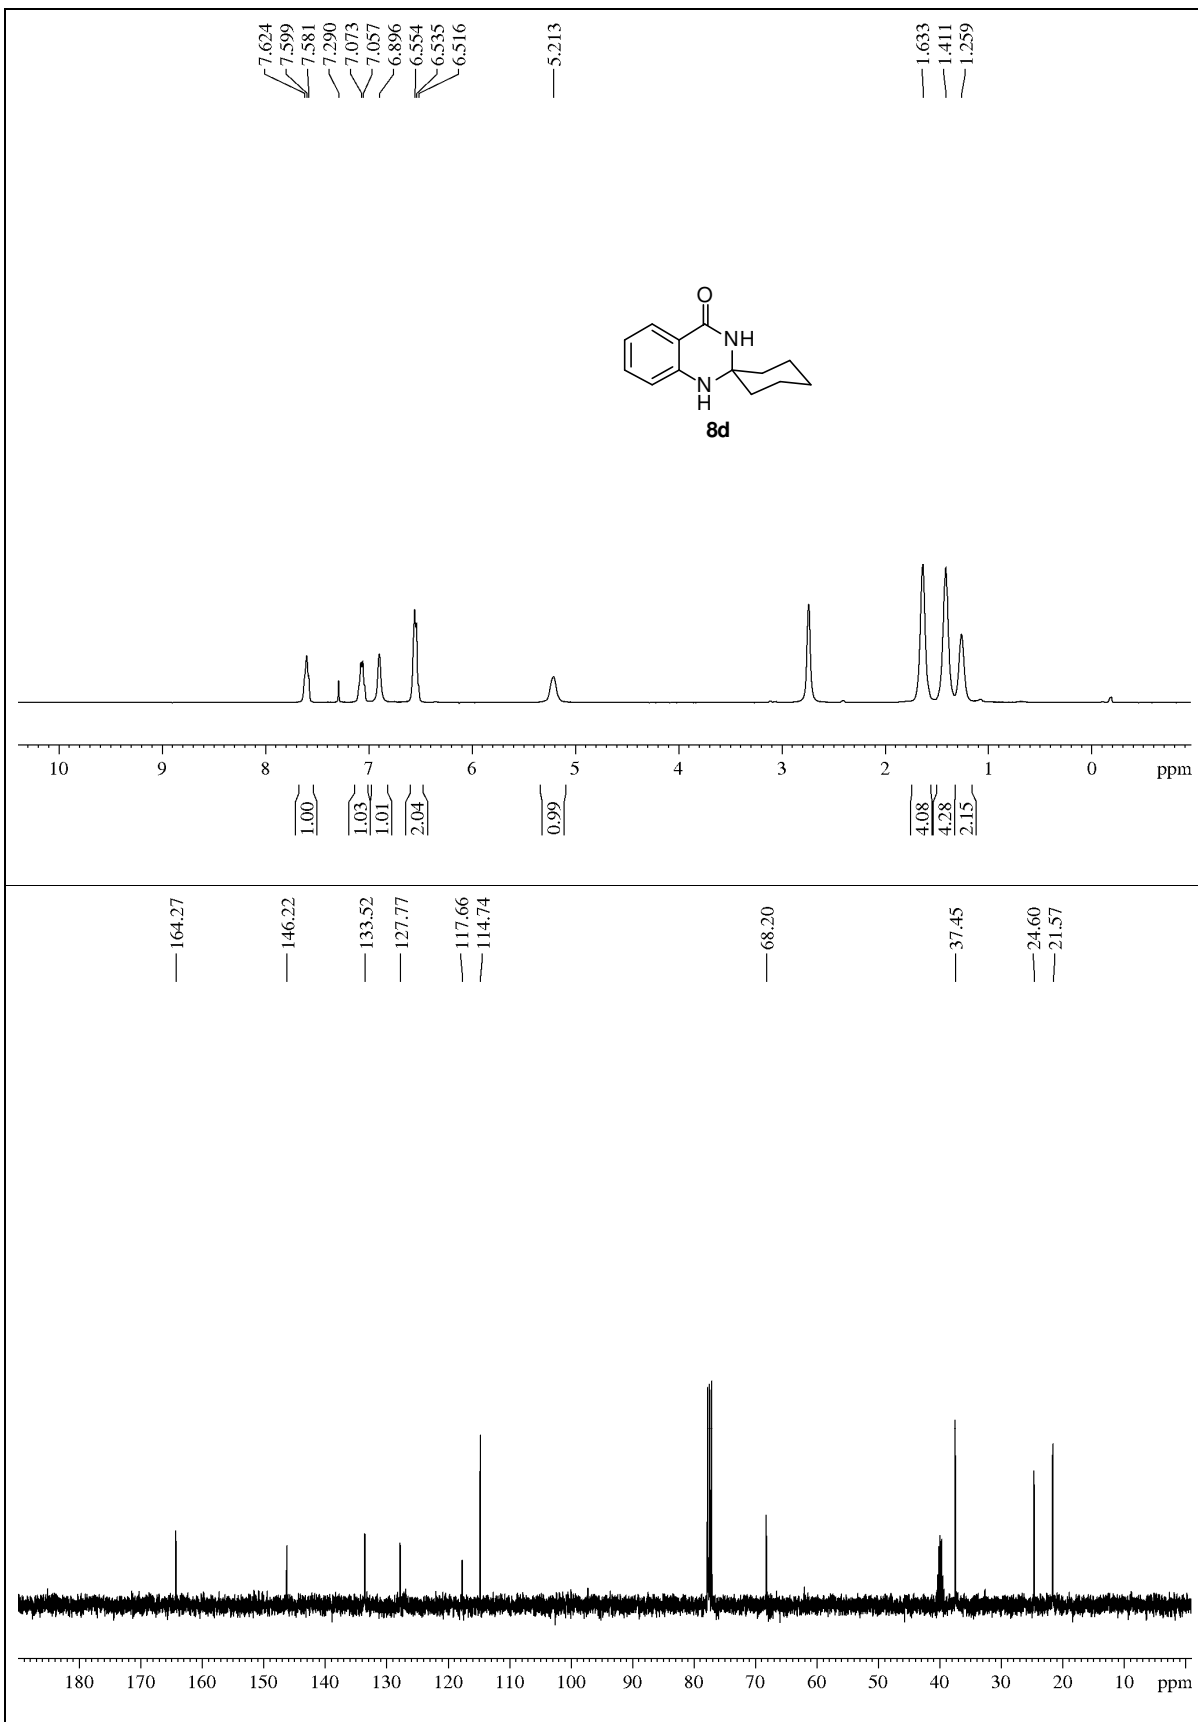

LCMS-2010A DATA REPORT  
SCHOOL OF CHEMISTRY  
UNIVERSITY OF HYDERABAD

User : Admin  
Sample : SKG-679  
Inj. Volume : 5.000  
Data Name : C:\LCMSsolution\User\Data\SKG-679-APCI-POS1.qld  
Method Name : C:\LCMSsolution\User\Method\esi.qlm

MS Spectrum

Line#: 1 R.Time: 0.845(Scan#: 51) Positive  
MassPeaks: 99 BasePeak: 217.15(3171594)  
RawMode: Single 0.845(51)  
BG Mode: Peak Start 0.627(38)

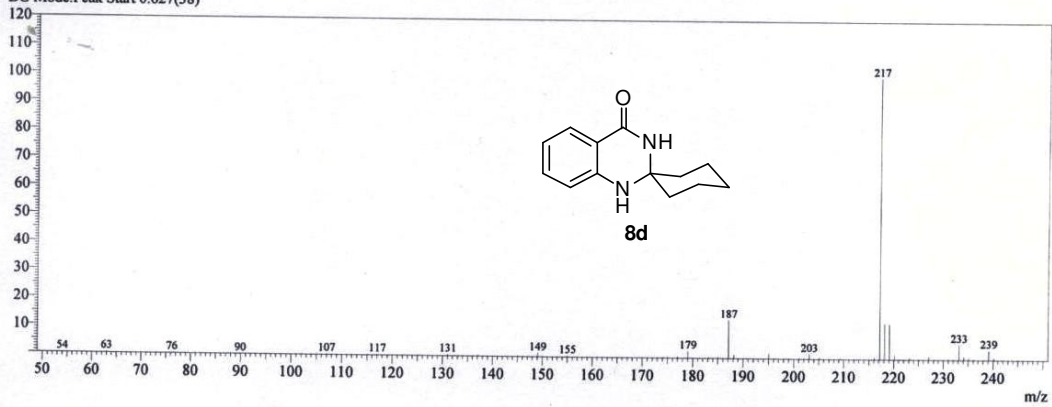

| Peak# | R.Time | I.Time | F.Time | Area      | Height   | A/H   | Mark | %Total | Name | Base m/z | Base Int. |
|-------|--------|--------|--------|-----------|----------|-------|------|--------|------|----------|-----------|
| 1     | 0.845  | 0.627  | 1.143  | 120622280 | 10580566 | 11.40 |      | 100.00 |      | 217.15   | 3171594   |
|       |        |        |        | 120622280 | 10580566 |       |      | 100.00 |      |          |           |

FLASH EA 1112 SERIES CHN REPORT  
SCHOOL OF CHEMISTRY  
UNIVERSITY OF HYDERABAD

Method filename: C:\Program Files\Thermo Finnigan\Eager 300 for EA1112\DATA\Sys\_data\_ex  
Sample ID: SKG-679 (# 146)  
Analysis type: UnkNown  
Chromatogram filename: UNK-18022015-6.dat  
Sample weight: 1.112

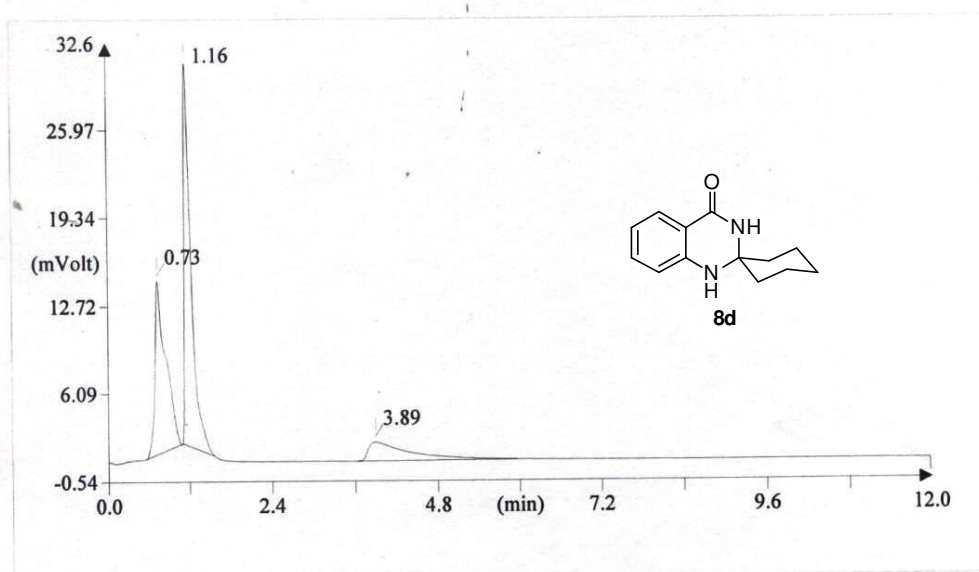

| Element Name | Element % | Ret. Time |
|--------------|-----------|-----------|
| Nitrogen     | 13.07     | 0.73      |
| Carbon       | 72.25     | 1.16      |
| Hydrogen     | 7.41      | 3.89      |

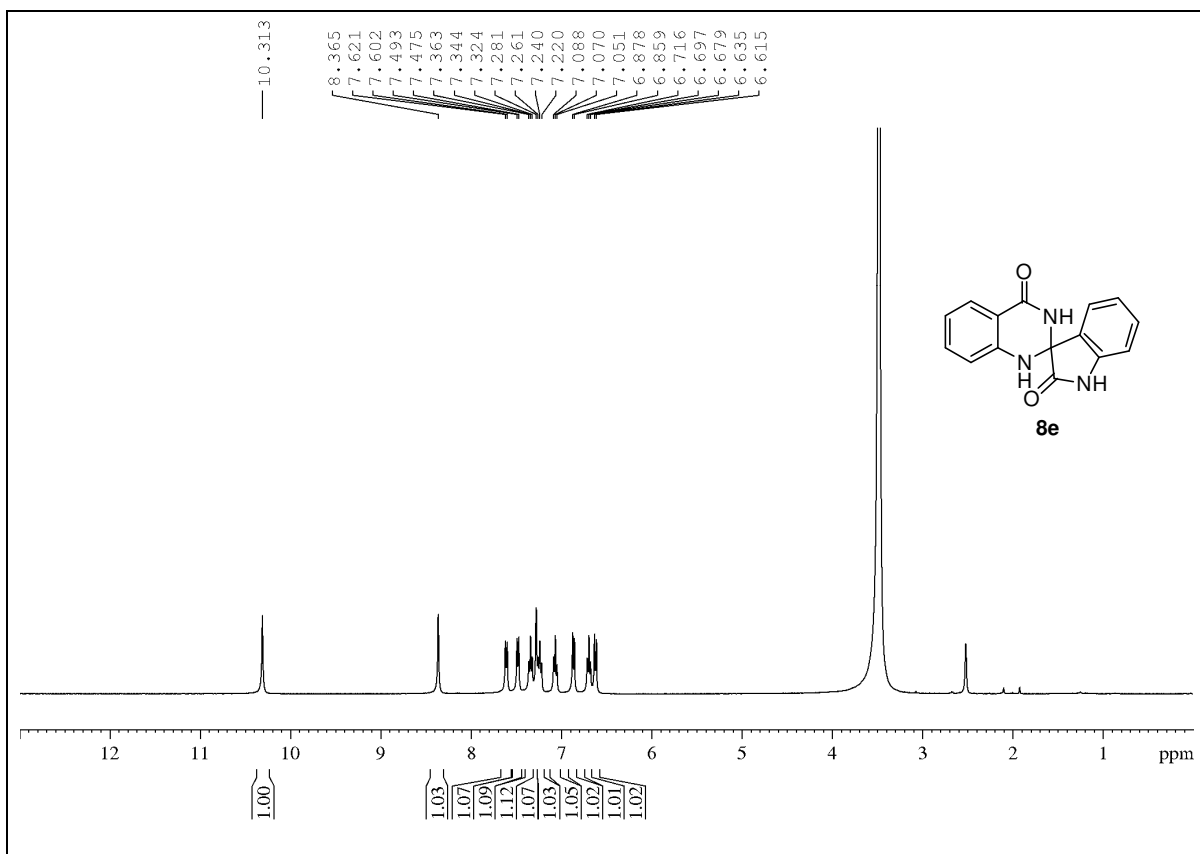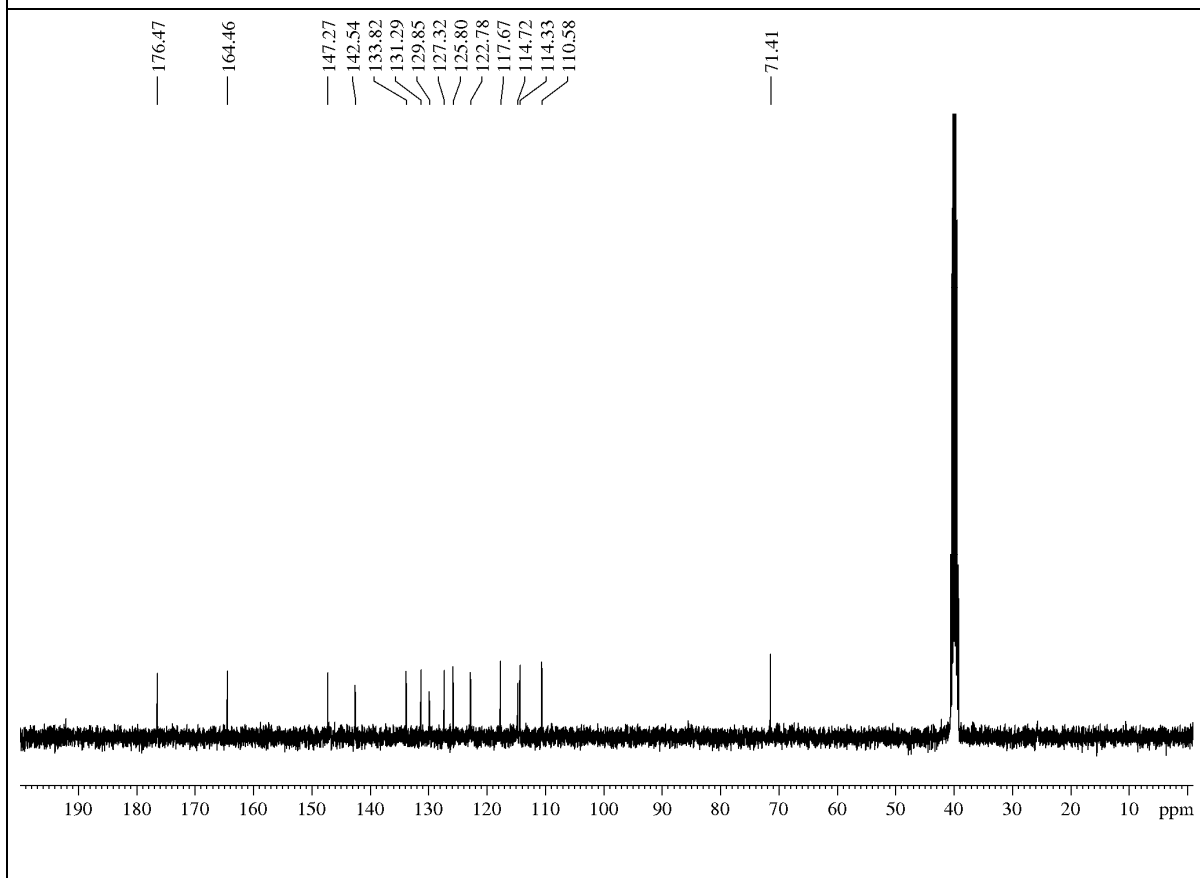

**LCMS-2010A DATA REPORT  
SCHOOL OF CHEMISTRY  
UNIVERSITY OF HYDERABAD**

User : Admin  
Sample : SKG-678  
Inj. Volume : 5.000  
Data Name : C:\LCMSsolution\User\Data\SKG-678-APCI-POS1.qld  
Method Name : C:\LCMSsolution\User\Method\esi.qlm

MS Spectrum

Line#:1 R.Time:0.964(Scan#:58) Positive  
MassPeaks:181 BasePeak:266.25(14363291)  
RawMode:Single 0.964(58)  
BG Mode:Peak Start 0.527(32)

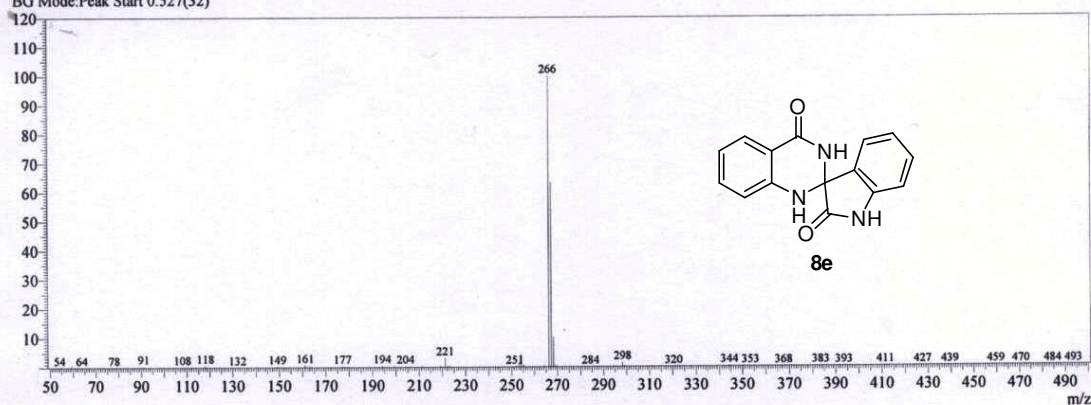

MS Peak Table

| Peak# | R.Time | I.Time | F.Time | Area      | Height  | A/H   | Mark | %Total | Name |
|-------|--------|--------|--------|-----------|---------|-------|------|--------|------|
| 1     | 0.964  | 0.527  | 1.143  | 226437874 | 7121250 | 31.79 |      | 100.00 |      |
|       |        |        |        | 226437874 | 7121250 |       |      | 100.00 |      |

Base m/z Base Int.  
266.25 14363291



FLASH EA 1112 SERIES CHN REPORT  
SCHOOL OF CHEMISTRY  
UNIVERSITY OF HYDERABAD

Method filename: C:\Program Files\Thermo Finnigan\Eager 300 for EA1112\DATA\Sys\_data\_ex  
Sample ID: SKG-678 (# 158)  
Analysis type: UnkNown  
Chromatogram filename: UNK-18022015-18.dat  
Sample weight: 1.263

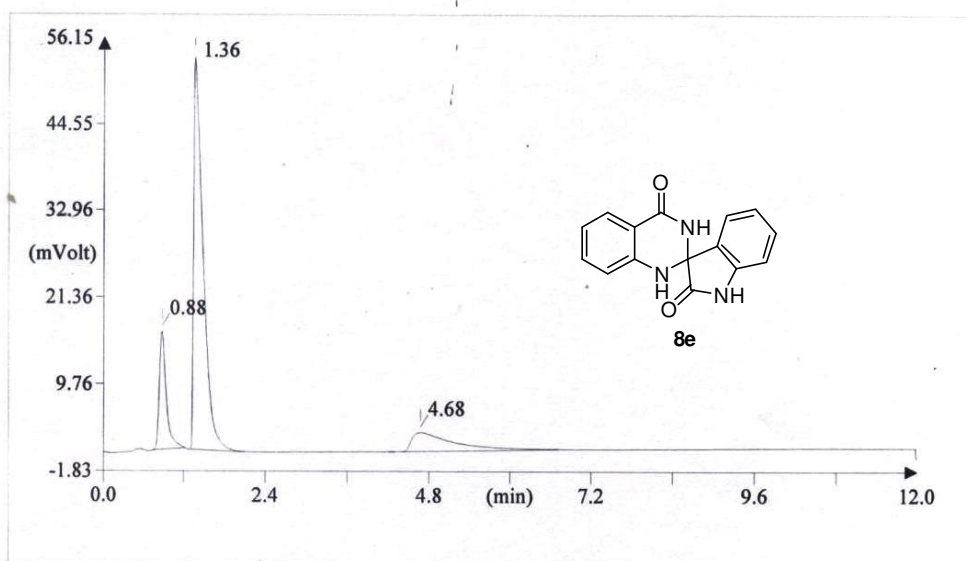

| Element Name | Element % | Ret. Time |
|--------------|-----------|-----------|
| Nitrogen     | 15.76     | 0.88      |
| Carbon       | 67.85     | 1.36      |
| Hydrogen     | 4.12      | 4.68      |

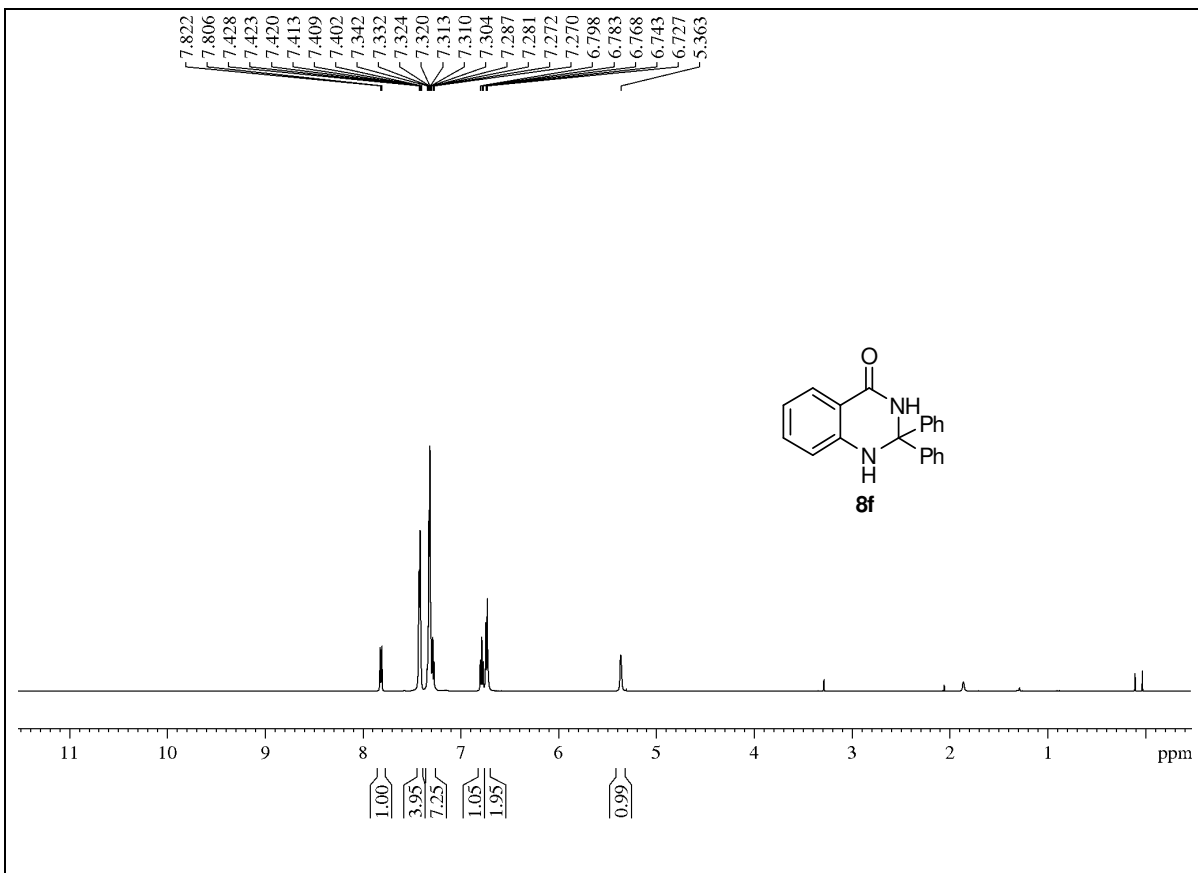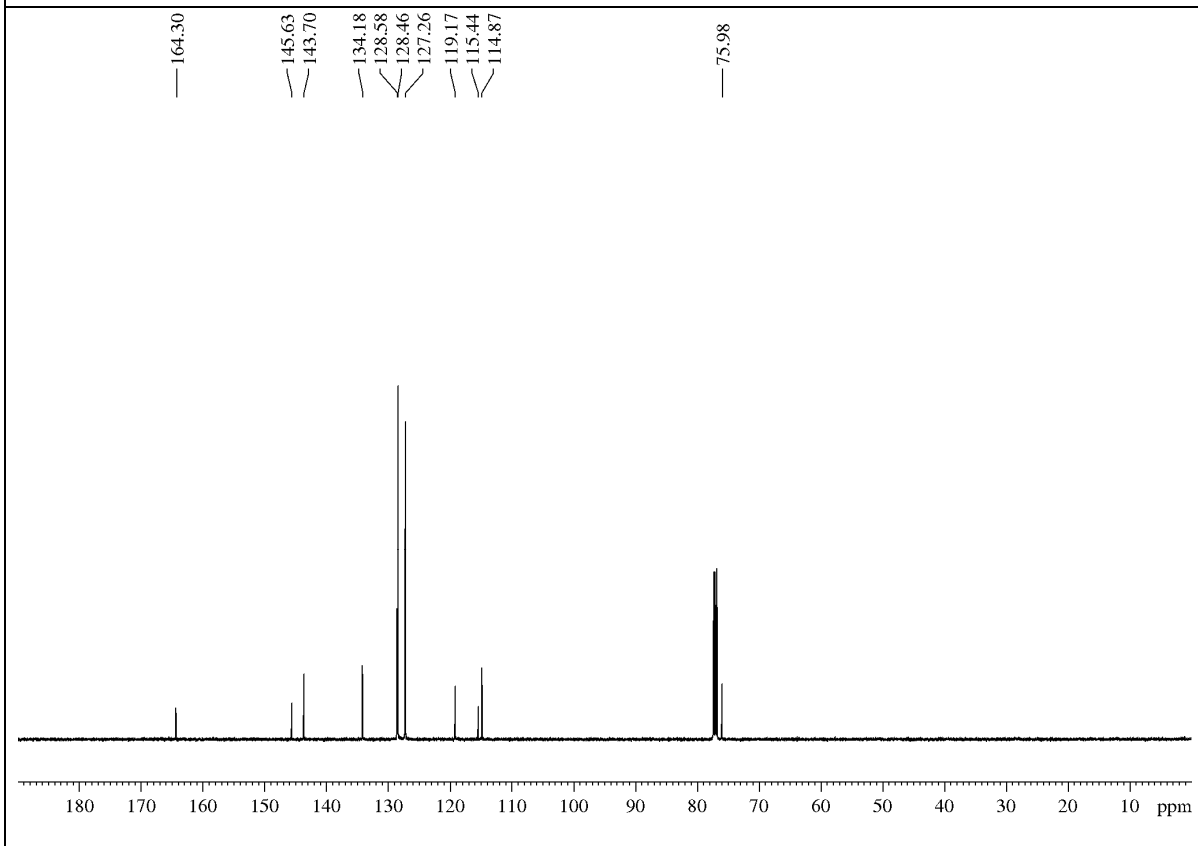

# BRUKER MAXIS HRMS REPORT

School of Chemistry  
University of Hyderabad

## Analysis Info

Analysis Name D:\Data\2015\DrNagarajan\JULY\SKG-726R1.d  
Method tune\_low.m  
Sample Name SKG-726-DCM-MEOH  
Comment

Acquisition Date 7/2/2015 12:15:13 PM

Operator Ramu Sridhar  
Instrument maXis 10138

## Acquisition Parameter

|             |            |                       |           |                  |           |
|-------------|------------|-----------------------|-----------|------------------|-----------|
| Source Type | ESI        | Ion Polarity          | Positive  | Set Nebulizer    | 4.4 psi   |
| Focus       | Not active | Set Capillary         | 4500 V    | Set Dry Heater   | 200 °C    |
| Scan Begin  | 50 m/z     | Set End Plate Offset  | -500 V    | Set Dry Gas      | 4.0 l/min |
| Scan End    | 1800 m/z   | Set Collision Cell RF | 350.0 Vpp | Set Divert Valve | Waste     |

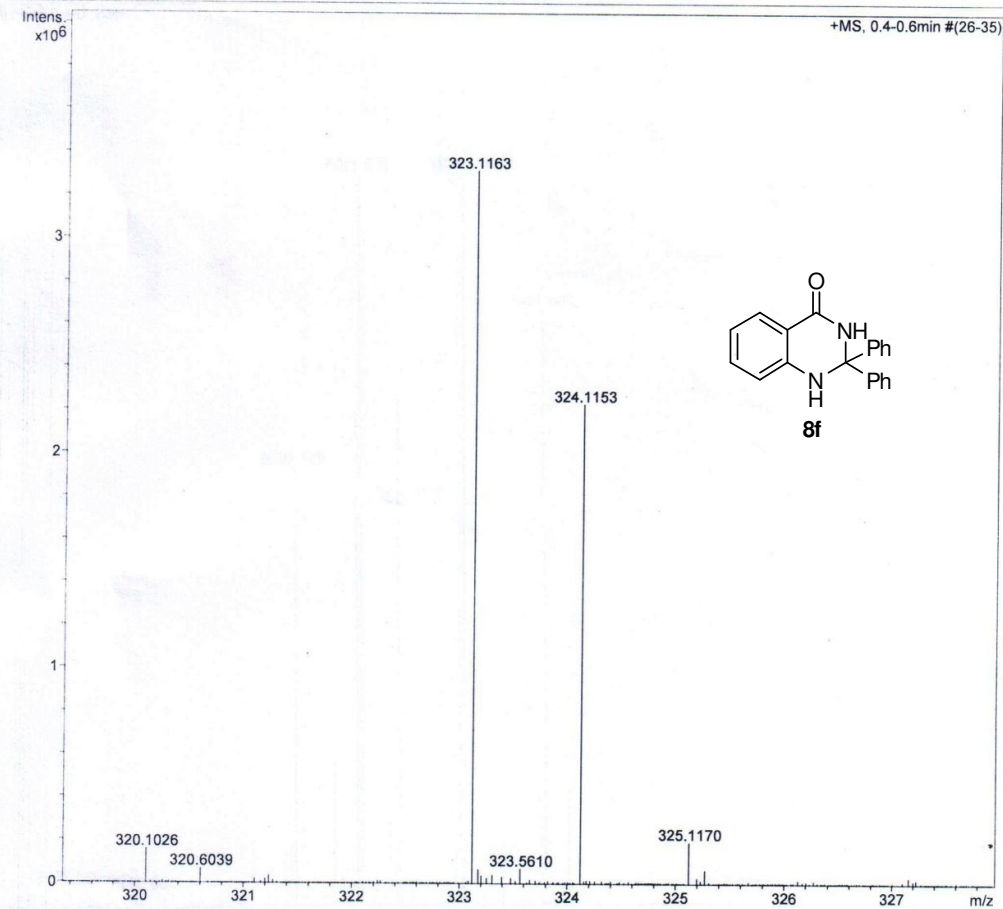

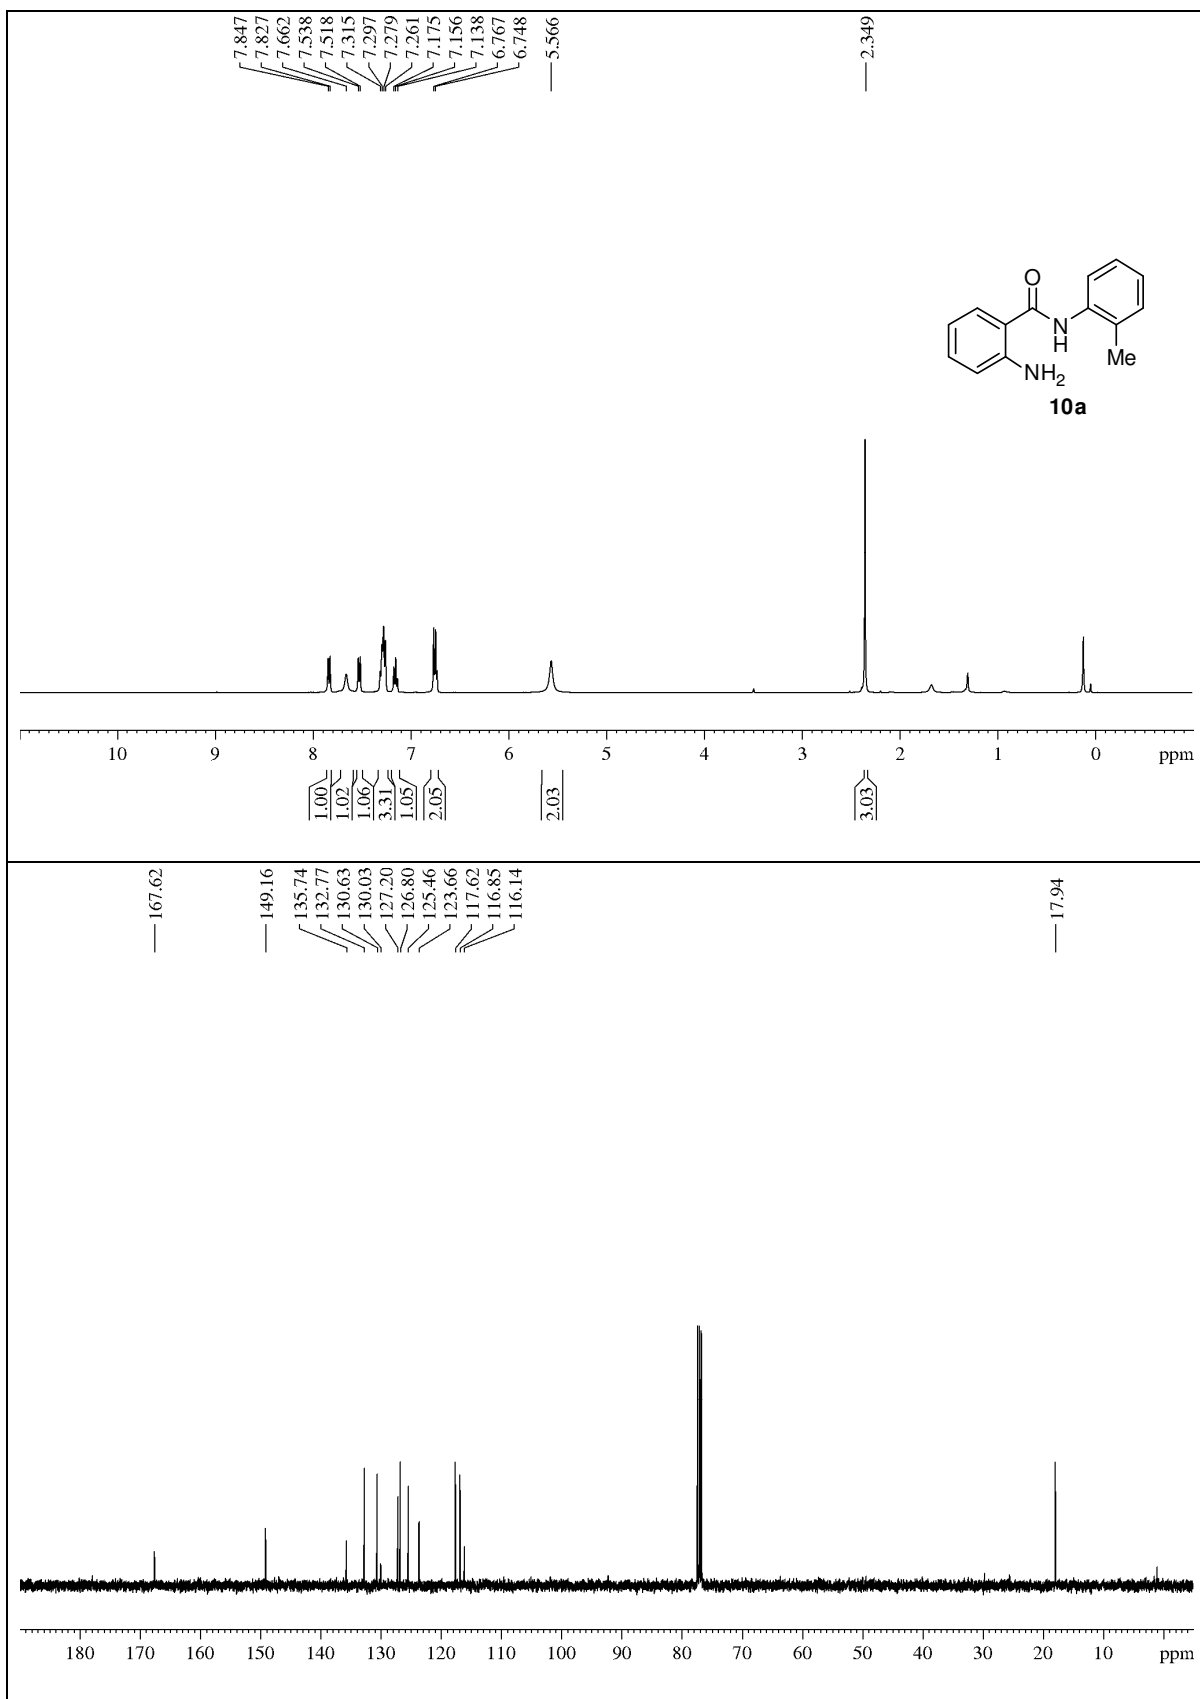

# BRUKER MAXIS HRMS REPORT

School of Chemistry  
University of Hyderabad

## Analysis Info

Analysis Name D:\Data\2015\DrNagarajan\AUG\SKG-644.d  
Method tune\_low.m  
Sample Name SKG-644-DCM-MEOH  
Comment

Acquisition Date 8/5/2015 12:13:15 PM

Operator Ramu Sridhar  
Instrument maXis 10138

## Acquisition Parameter

|             |            |                       |           |                  |           |
|-------------|------------|-----------------------|-----------|------------------|-----------|
| Source Type | ESI        | Ion Polarity          | Positive  | Set Nebulizer    | 4.4 psi   |
| Focus       | Not active | Set Capillary         | 4000 V    | Set Dry Heater   | 180 °C    |
| Scan Begin  | 50 m/z     | Set End Plate Offset  | -500 V    | Set Dry Gas      | 4.0 l/min |
| Scan End    | 1700 m/z   | Set Collision Cell RF | 150.0 Vpp | Set Divert Valve | Waste     |

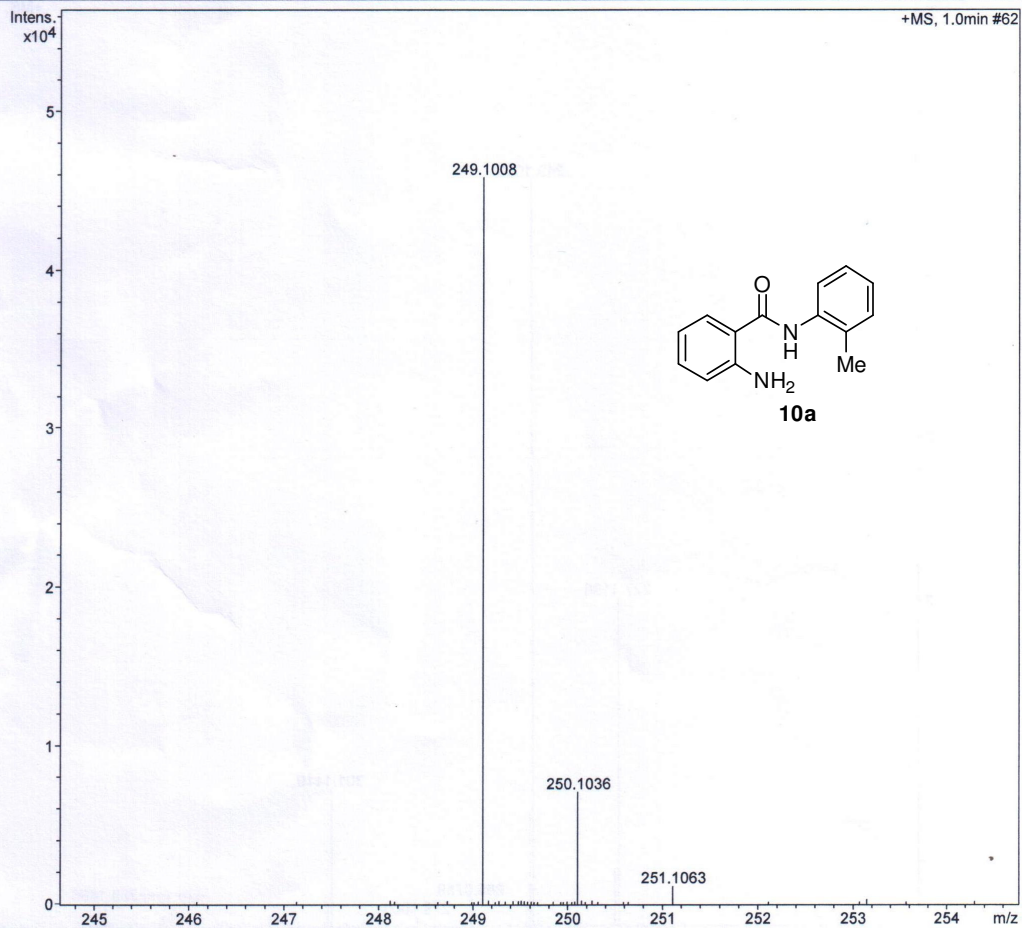

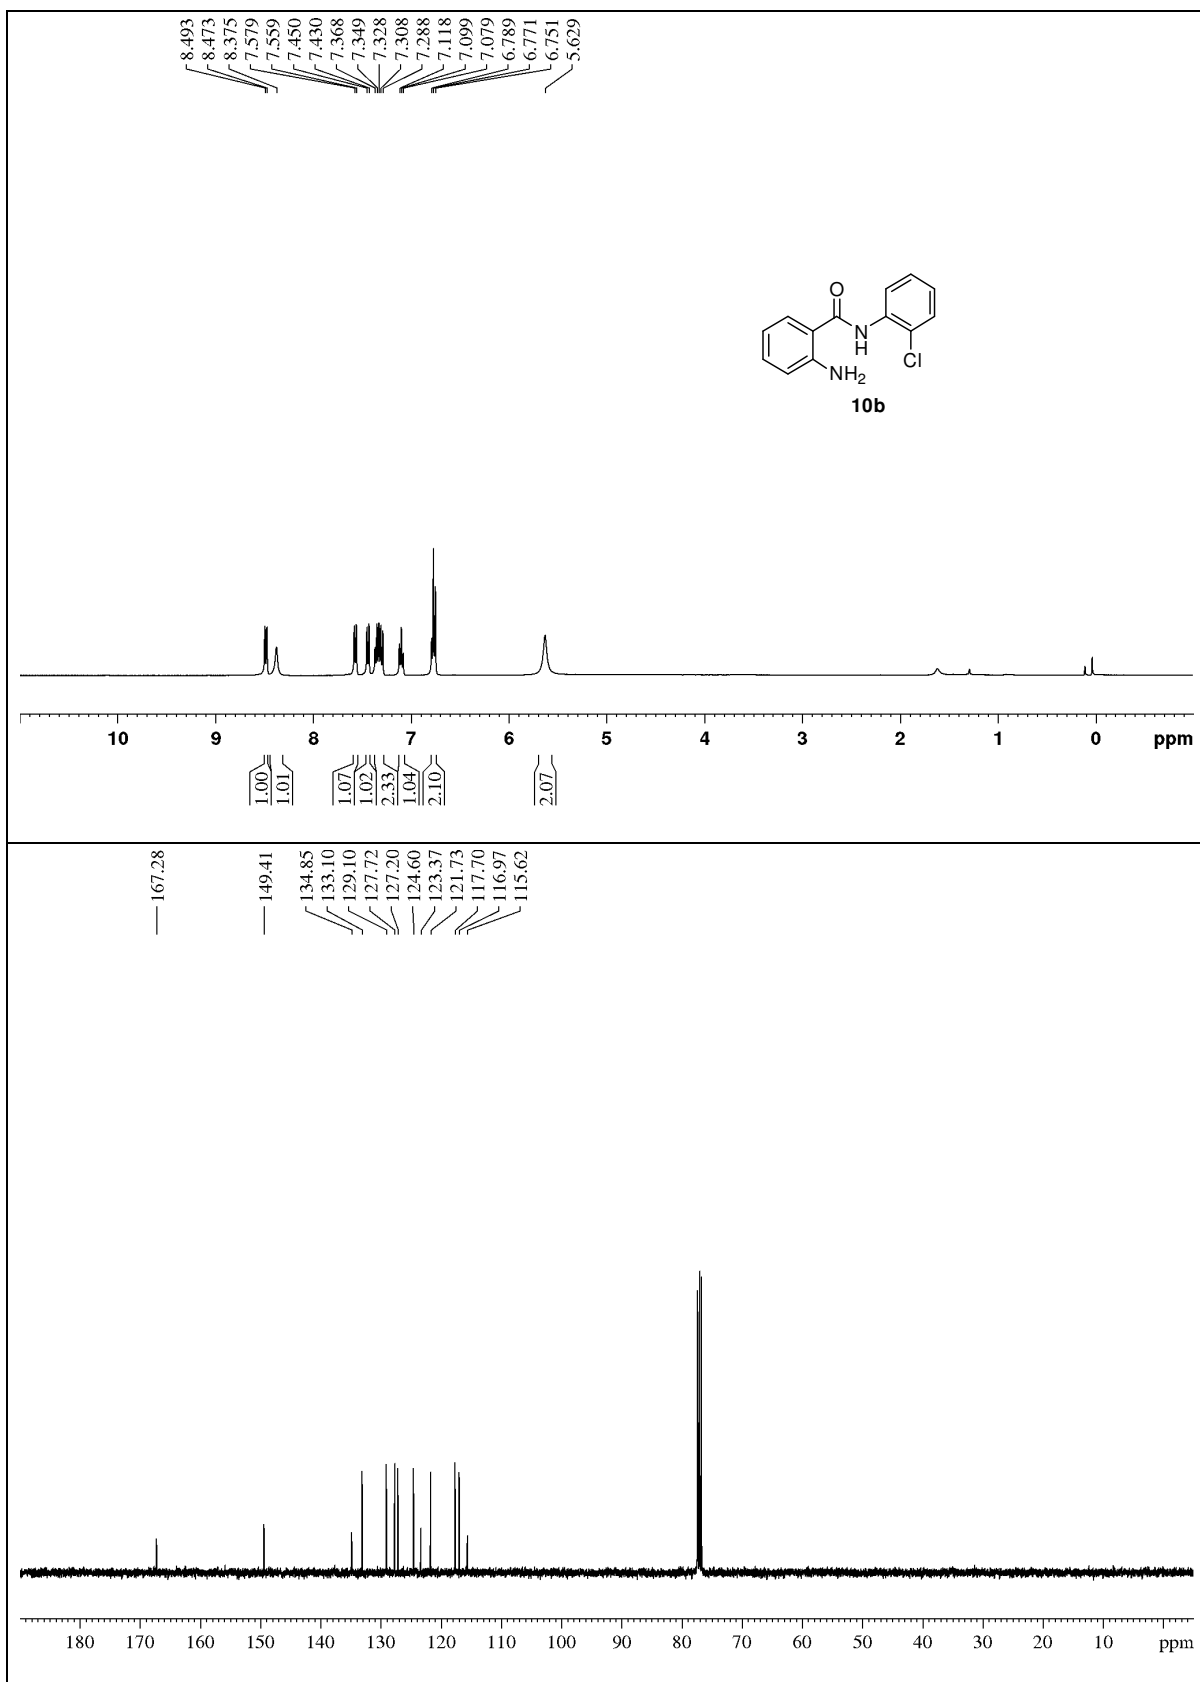

# BRUKER MAXIS HRMS REPORT

School of Chemistry  
University of Hyderabad

## Analysis Info

Analysis Name D:\Data\2015\DrNagarajan\AUG\SKG-656.d  
Method tune\_low.m  
Sample Name SKG-656-DCM-MEOH  
Comment

Acquisition Date 8/5/2015 12:26:16 PM

Operator Ramu Sridhar  
Instrument maXis 10138

## Acquisition Parameter

|             |            |                       |           |                  |           |
|-------------|------------|-----------------------|-----------|------------------|-----------|
| Source Type | ESI        | Ion Polarity          | Positive  | Set Nebulizer    | 4.4 psi   |
| Focus       | Not active | Set Capillary         | 3000 V    | Set Dry Heater   | 180 °C    |
| Scan Begin  | 50 m/z     | Set End Plate Offset  | -500 V    | Set Dry Gas      | 4.0 l/min |
| Scan End    | 1700 m/z   | Set Collision Cell RF | 150.0 Vpp | Set Divert Valve | Waste     |

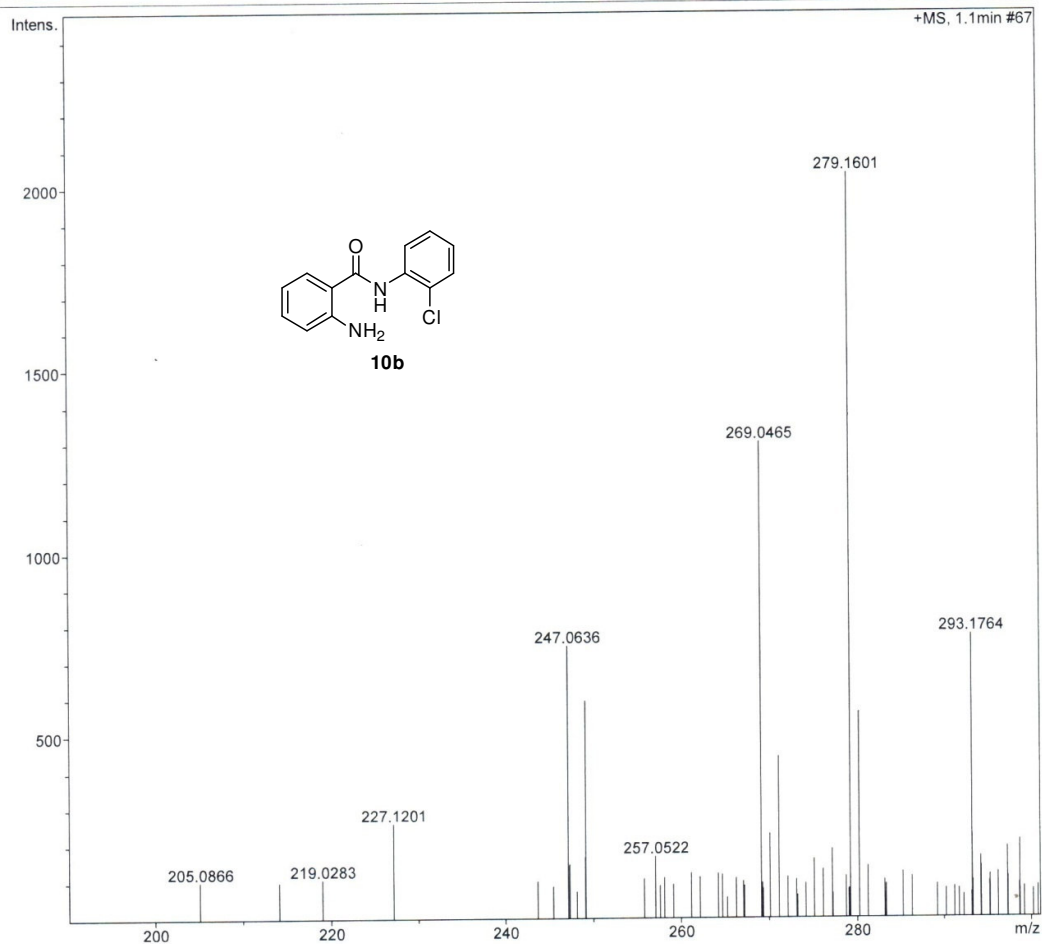



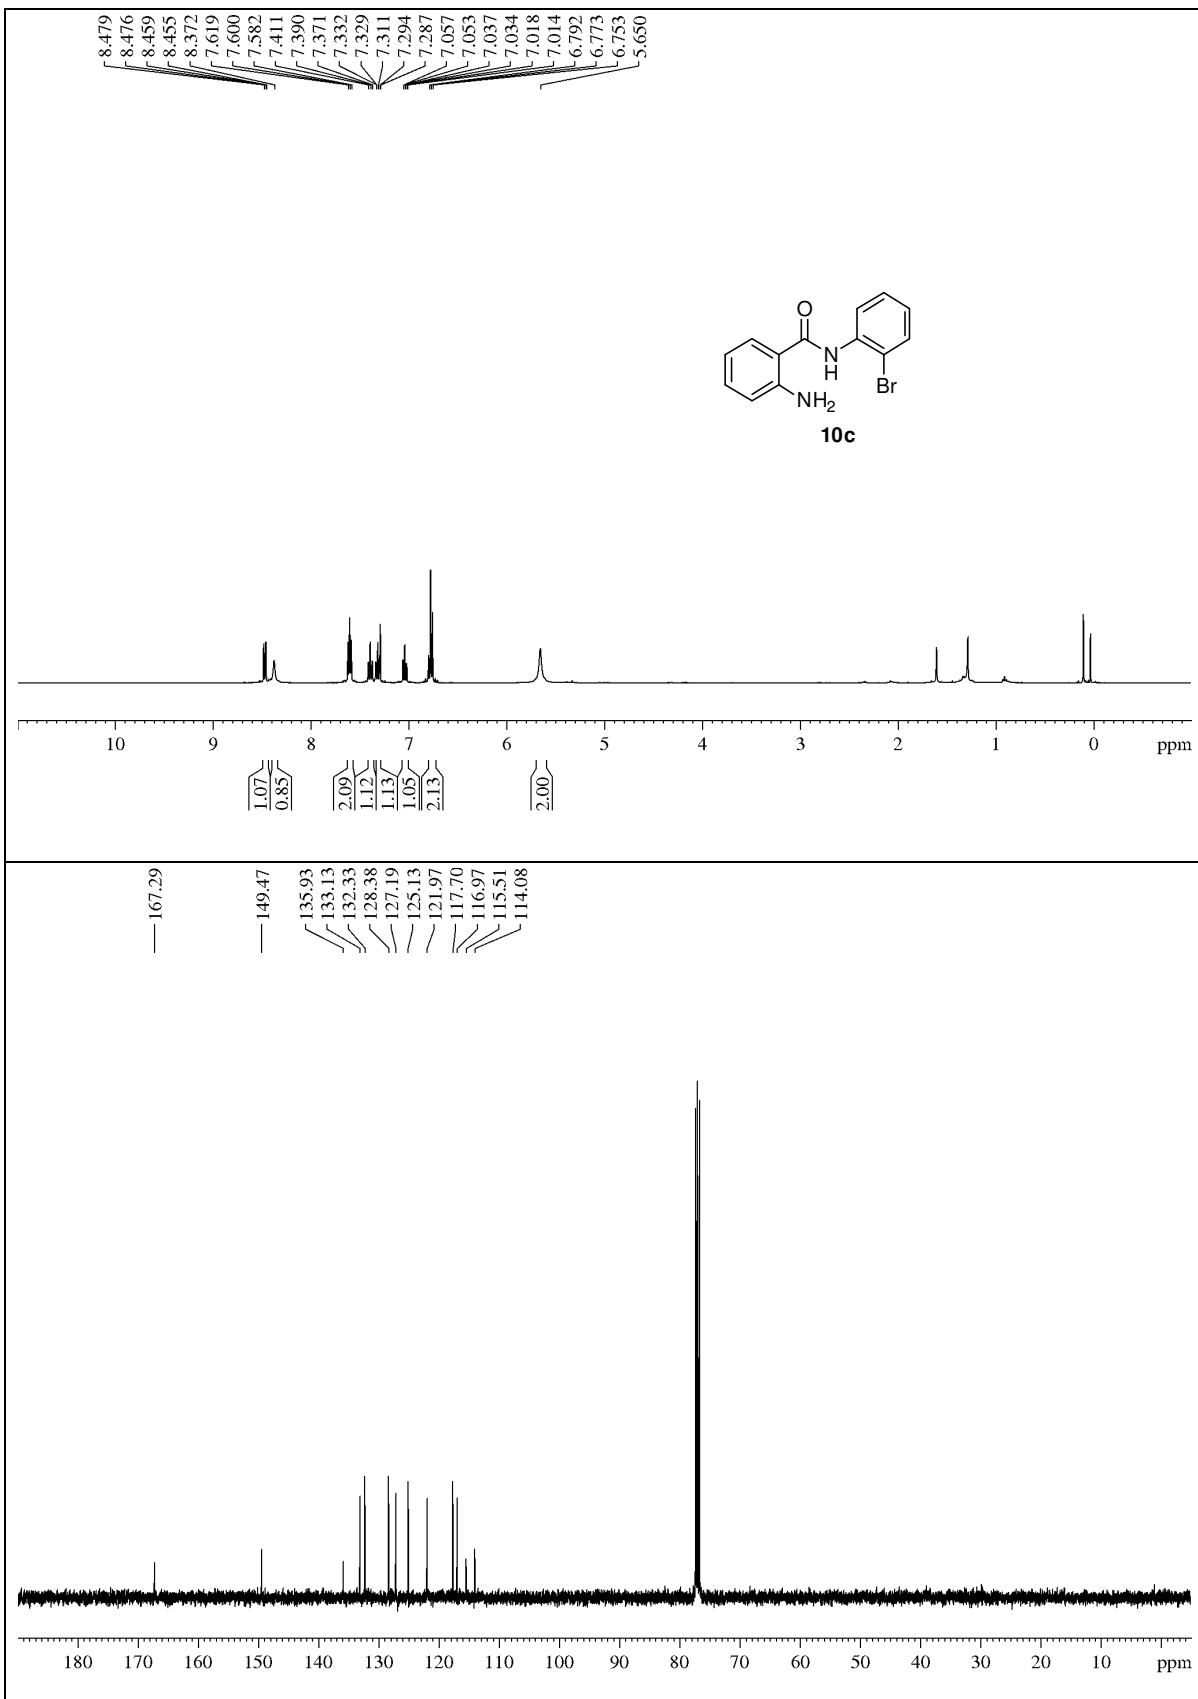

# BRUKER MAXIS HRMS REPORT

School of Chemistry  
University of Hyderabad

## Analysis Info

Analysis Name D:\Data\2015\DrNagarajan\AUG\SKG-665R.d  
Method tune\_low.m  
Sample Name SKG-665-DCM-MEOH  
Comment

Acquisition Date 8/5/2015 1:08:23 PM

Operator Ramu Sridhar  
Instrument maXis 10138

## Acquisition Parameter

|             |            |                       |           |                  |           |
|-------------|------------|-----------------------|-----------|------------------|-----------|
| Source Type | ESI        | Ion Polarity          | Positive  | Set Nebulizer    | 4.4 psi   |
| Focus       | Not active | Set Capillary         | 4500 V    | Set Dry Heater   | 200 °C    |
| Scan Begin  | 50 m/z     | Set End Plate Offset  | -500 V    | Set Dry Gas      | 4.0 l/min |
| Scan End    | 1800 m/z   | Set Collision Cell RF | 350.0 Vpp | Set Divert Valve | Waste     |

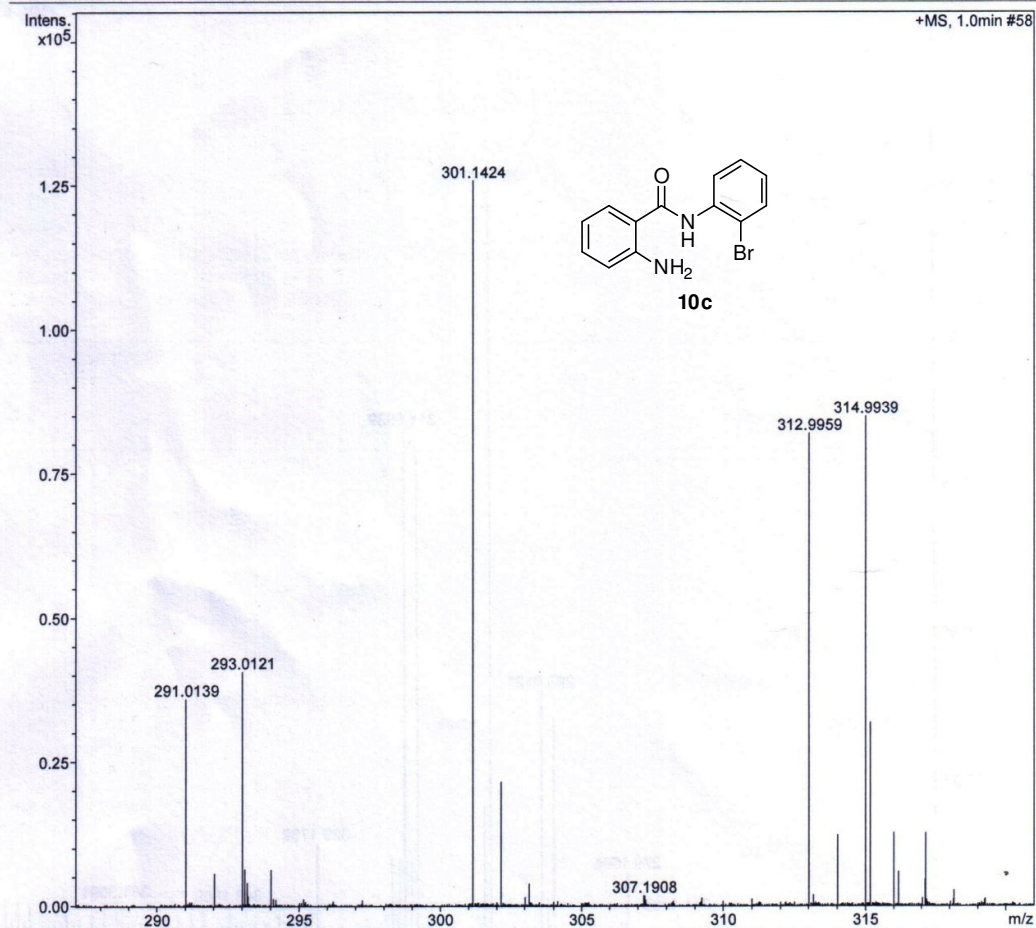

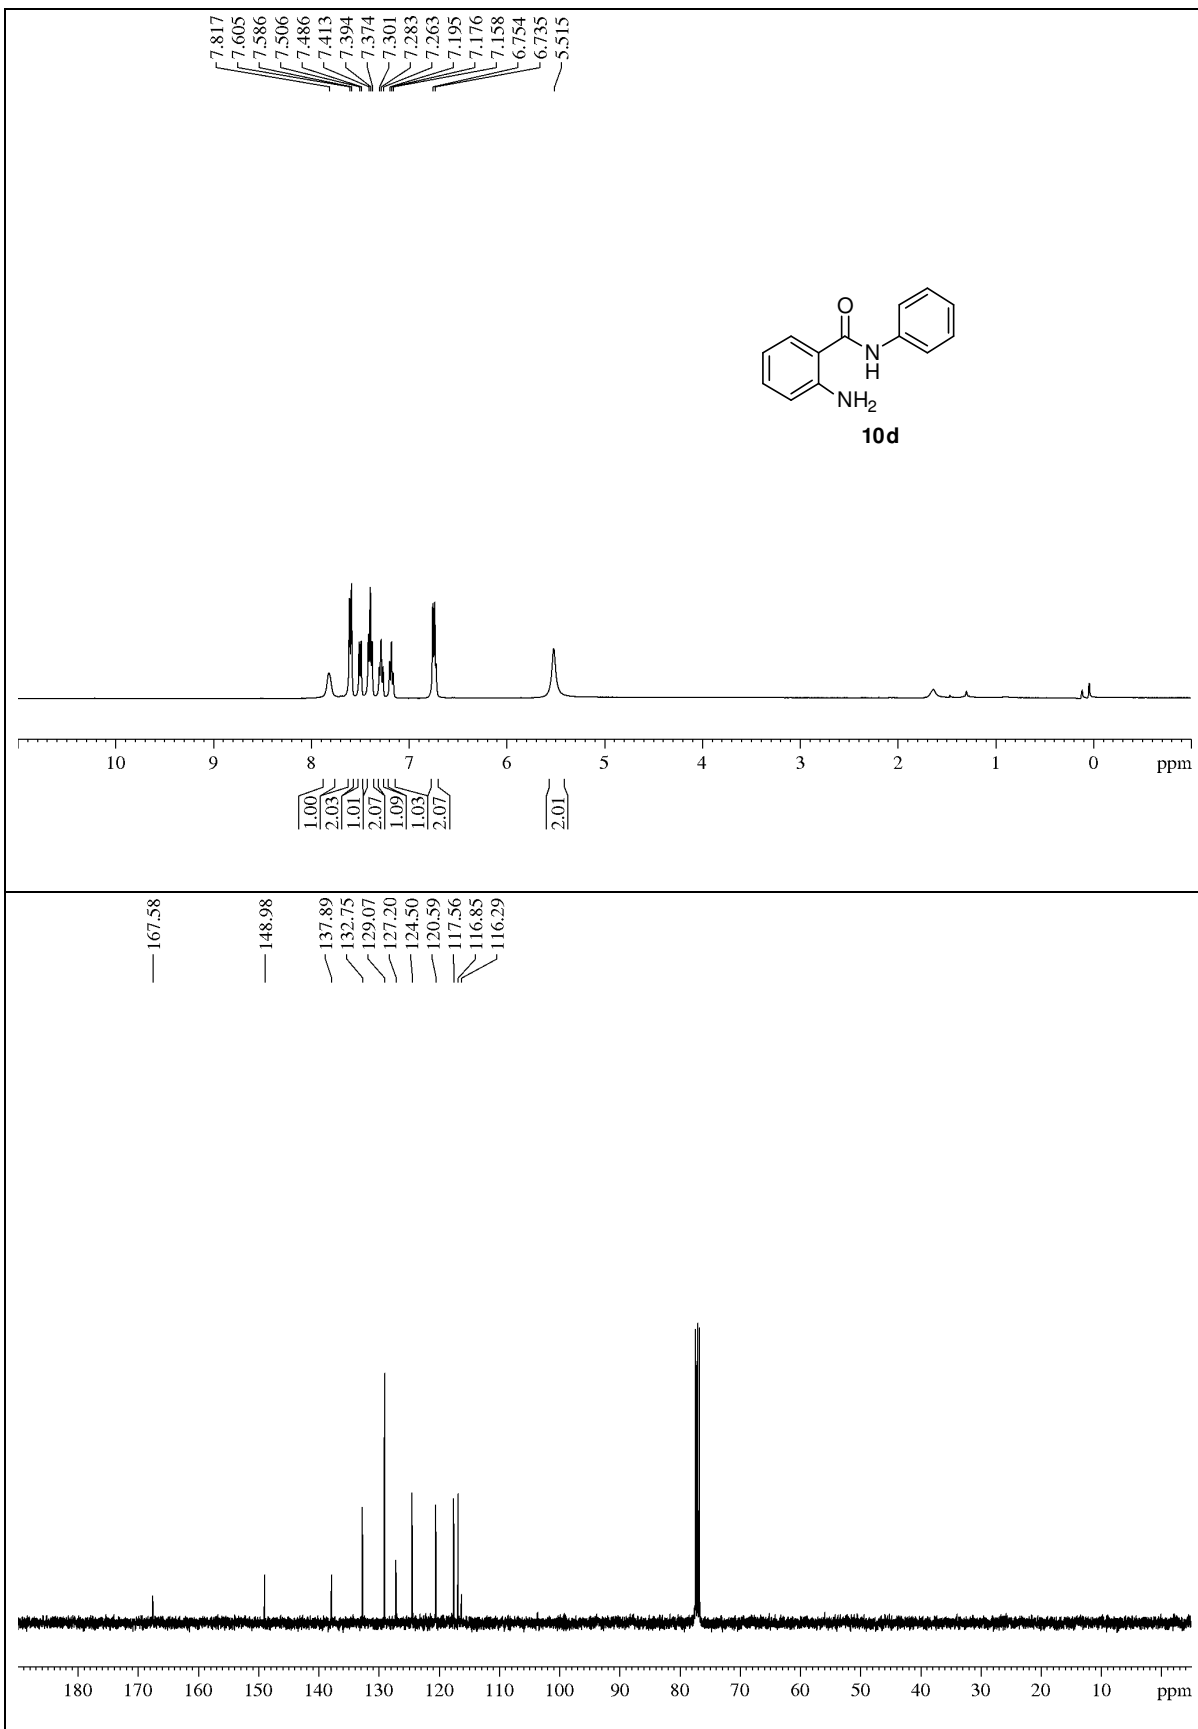

# BRUKER MAXIS HRMS REPORT

School of Chemistry  
University of Hyderabad

## Analysis Info

Analysis Name D:\Data\2015\DrNagarajan\AUG\SKG-654.d  
Method tune\_low.m  
Sample Name SKG-654-DCM-MEOH  
Comment

Acquisition Date 8/5/2015 12:00:24 PM

Operator Ramu Sridhar  
Instrument maXis 10138

## Acquisition Parameter

|             |            |                       |           |                  |           |
|-------------|------------|-----------------------|-----------|------------------|-----------|
| Source Type | ESI        | Ion Polarity          | Positive  | Set Nebulizer    | 4.4 psi   |
| Focus       | Not active | Set Capillary         | 3200 V    | Set Dry Heater   | 180 °C    |
| Scan Begin  | 50 m/z     | Set End Plate Offset  | -500 V    | Set Dry Gas      | 4.0 l/min |
| Scan End    | 1700 m/z   | Set Collision Cell RF | 150.0 Vpp | Set Divert Valve | Waste     |

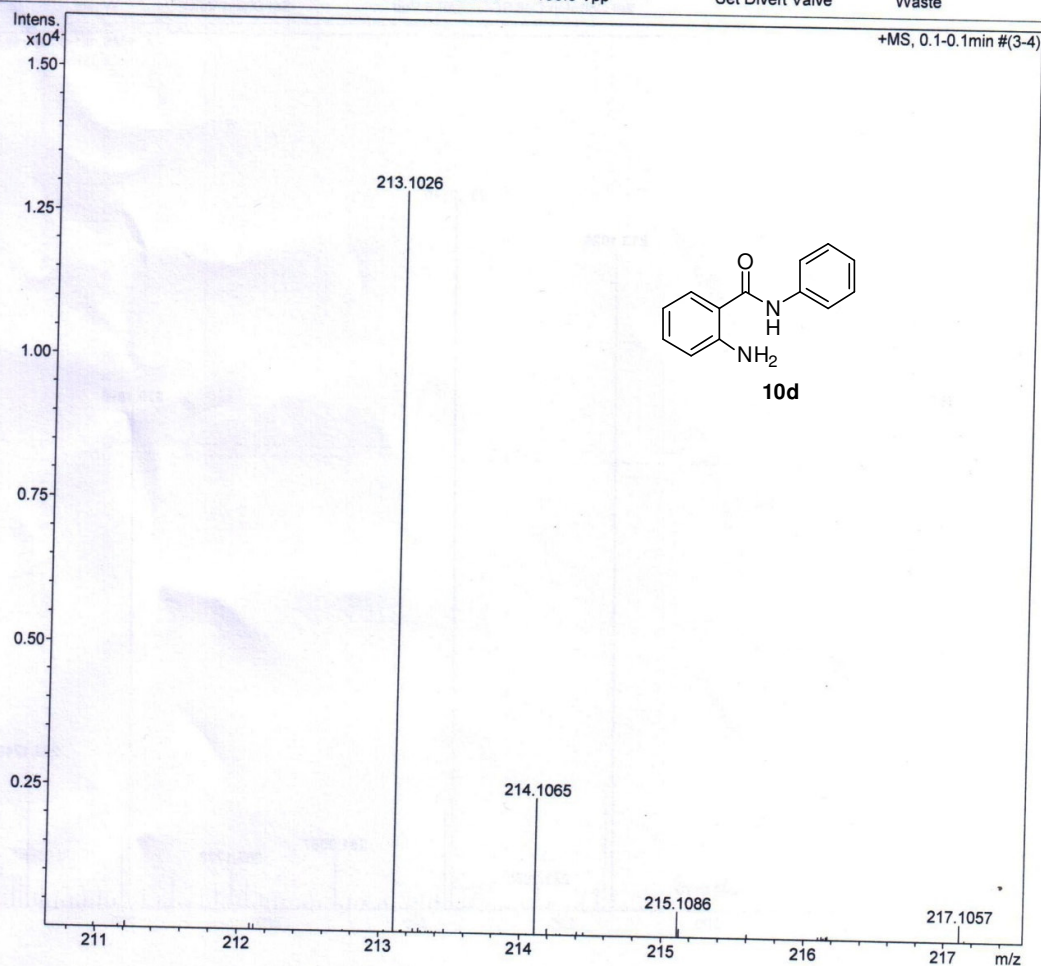

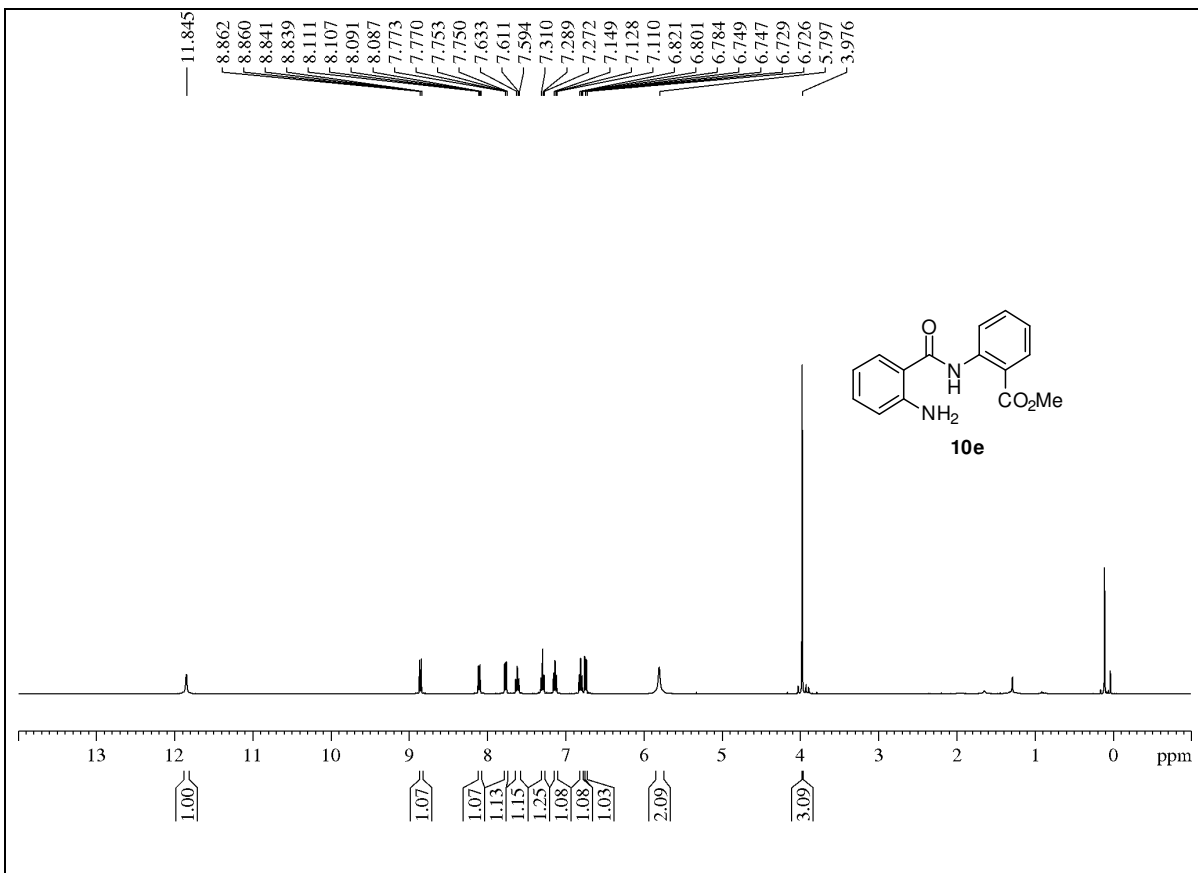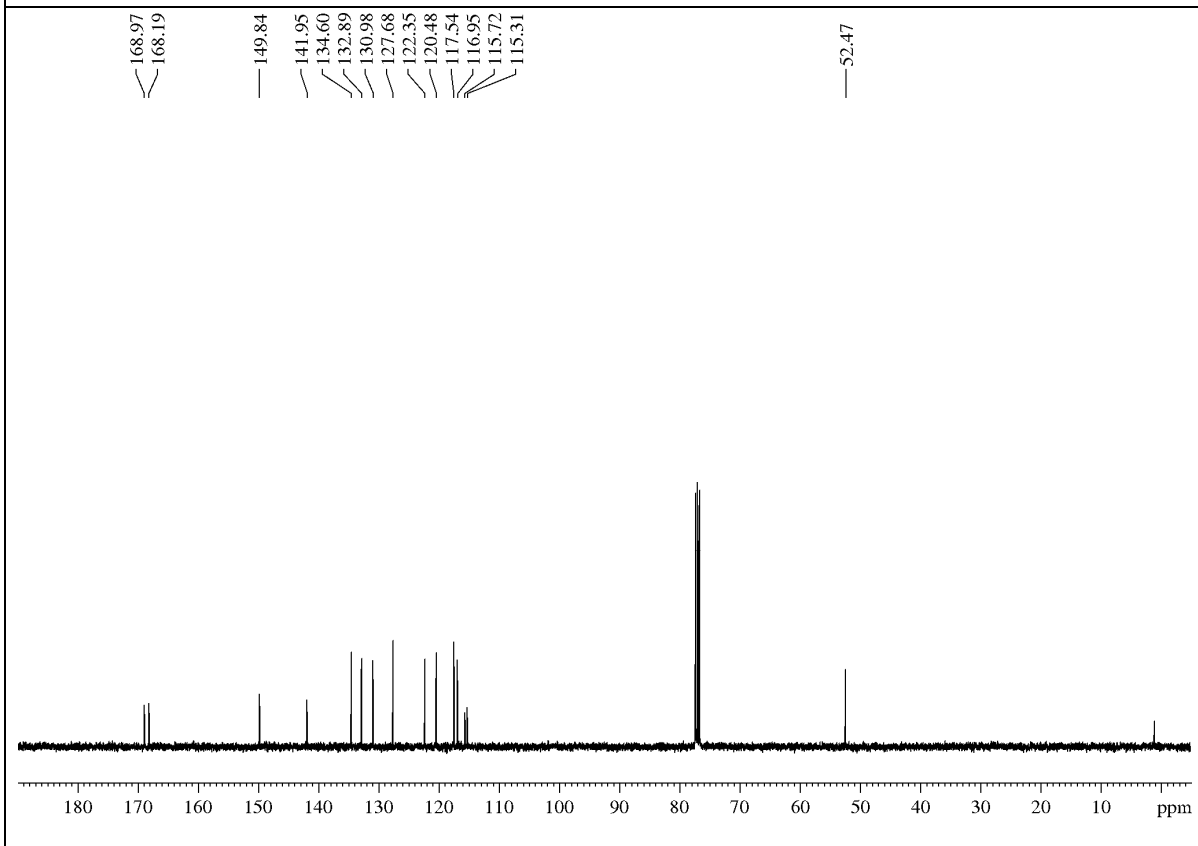

# BRUKER MAXIS HRMS REPORT

School of Chemistry  
University of Hyderabad

## Analysis Info

Analysis Name D:\Data\2015\DrNagarajan\AUG\SKG-659R.d  
Method tune\_low.m  
Sample Name SKG-659-DCM-MEOH  
Comment

Acquisition Date 8/5/2015 12:42:20 PM

Operator Ramu Sridhar  
Instrument maXis 10138

## Acquisition Parameter

|             |            |                       |           |                  |           |
|-------------|------------|-----------------------|-----------|------------------|-----------|
| Source Type | ESI        | Ion Polarity          | Positive  | Set Nebulizer    | 4.4 psi   |
| Focus       | Not active | Set Capillary         | 4500 V    | Set Dry Heater   | 200 °C    |
| Scan Begin  | 50 m/z     | Set End Plate Offset  | -500 V    | Set Dry Gas      | 4.0 l/min |
| Scan End    | 1800 m/z   | Set Collision Cell RF | 350.0 Vpp | Set Divert Valve | Waste     |

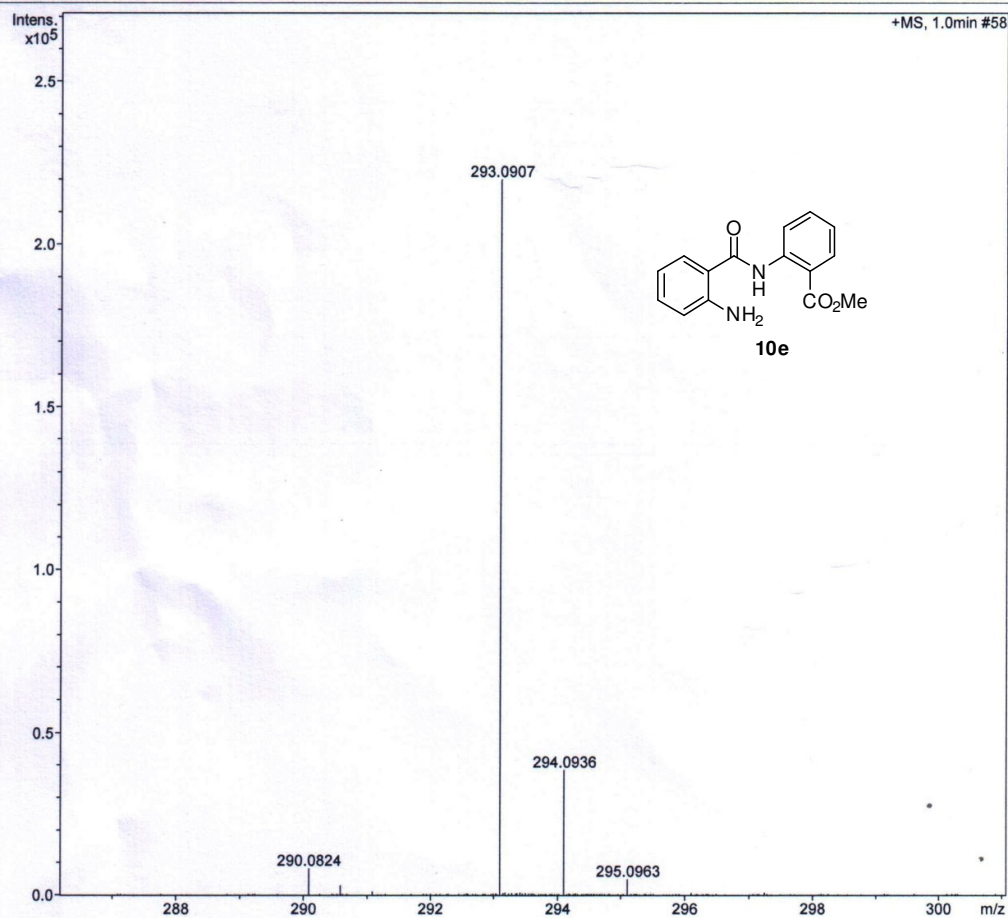



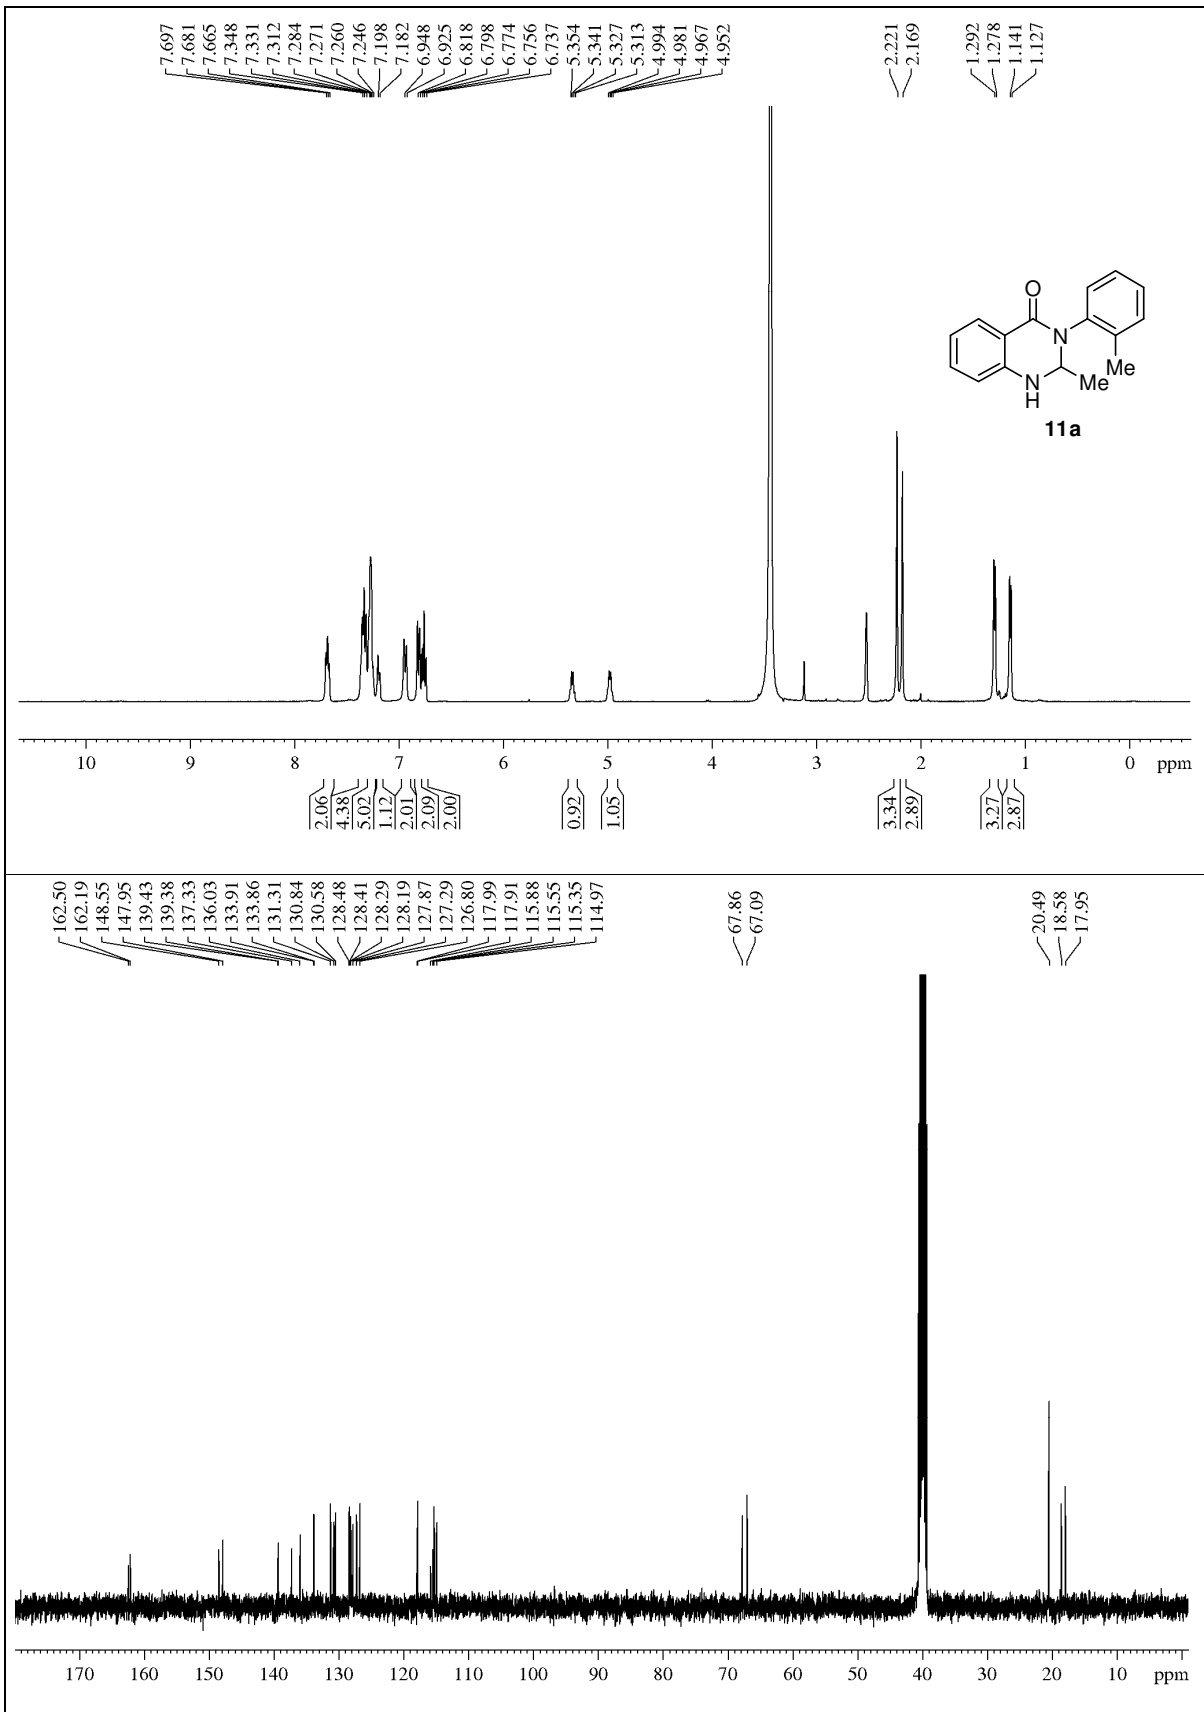

LCMS-2010A DATA REPORT  
SCHOOL OF CHEMISTRY  
UNIVERSITY OF HYDERABAD

User : Admin  
Sample : SKG-696  
Inj. Volume : 5.000  
Data Name : C:\LCMSsolution\User\Data\SKG-696-APCI-POS1.qld  
Method Name : C:\LCMSsolution\User\Method\esi.qlm

MS Spectrum

Line# 1 R.Time:0.759(Scan#:46) Positive  
MassPeaks:169 BasePeak:253.05(6921410)  
RawMode:Single 0.759(46)  
BG Mode:Peak Start 0.560(34)

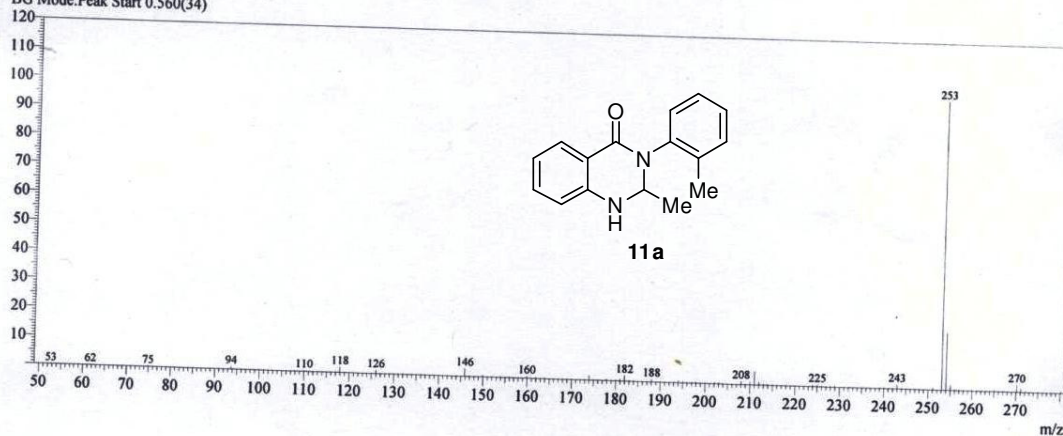

| Peak# | R.Time | I.Time | F.Time | Area      | Height   | A/H  | Mark | %Total | Name |
|-------|--------|--------|--------|-----------|----------|------|------|--------|------|
| 1     | 0.759  | 0.560  | 0.943  | 137998589 | 14374840 | 9.60 |      | 100.00 |      |
|       |        |        |        | 137998589 | 14374840 |      |      | 100.00 |      |

Base m/z Base Int.  
253.05 6921410

FLASH EA 1112 SERIES CHN REPORT  
SCHOOL OF CHEMISTRY  
UNIVERSITY OF HYDERABAD

Method filename: C:\Program Files\Thermo Finnigan\Eager 300 for EA1112\DATA\Sys\_data\_ex  
Sample ID: SKG-696 (# 149)  
Analysis type: UnkNown  
Chromatogram filename: UNK-18022015-9.dat  
Sample weight: 1.132

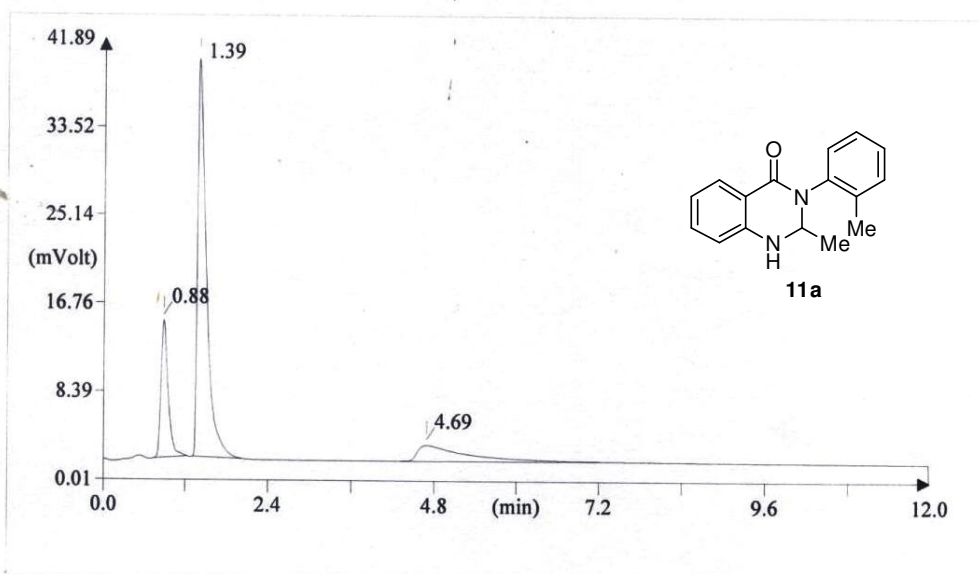

| Element Name | Element % | Ret. Time |
|--------------|-----------|-----------|
| Nitrogen     | 11.18     | 0.88      |
| Carbon       | 76.31     | 1.39      |
| Hydrogen     | 6.31      | 4.69      |

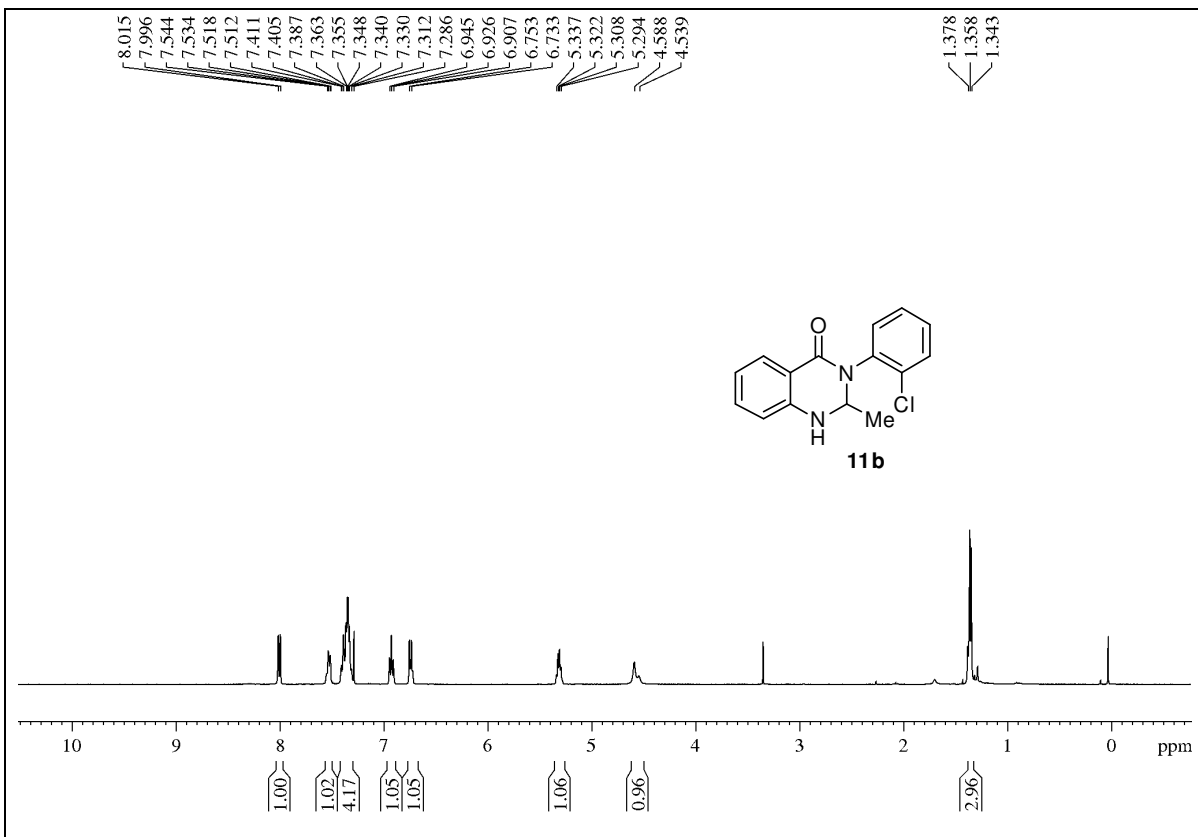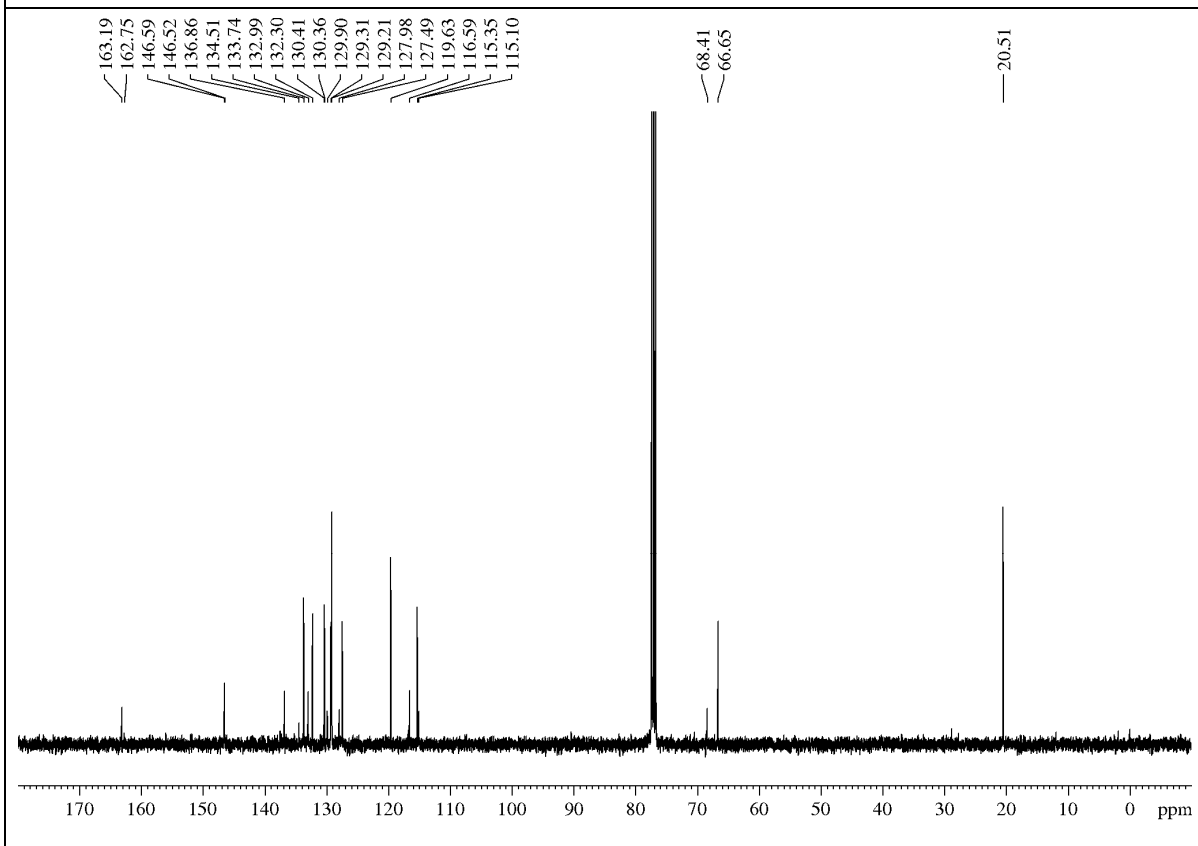

LCMS-2010A DATA REPORT  
SCHOOL OF CHEMISTRY  
UNIVERSITY OF HYDERABAD

User : Admin  
Sample : SKG-658  
Inj. Volume : 5.000  
Data Name : G:\LCMSsolution\User\Data\SKG-658-ESI-POS1.qld  
Method Name : C:\LCMSsolution\User\Method\Copy of JAY-4-APCI.qlm

MS Spectrum

Line# 1 R.Time: 0.621 (Scan#: 38) Positive  
MassPeaks: 74 BasePeak: 272.25 (351872)  
RawMode: Single 0.621 (38)  
BG Mode: Peak Start 0.343 (21)

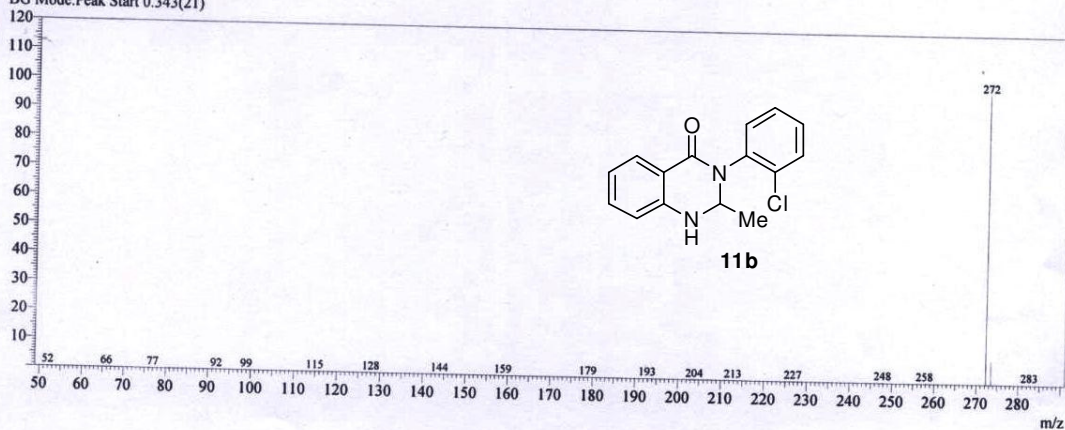

| Peak# | R.Time | I.Time | F.Time | Area     | Height  | A/H   | Mark | %Total | Name | Base m/z | Base Int. |
|-------|--------|--------|--------|----------|---------|-------|------|--------|------|----------|-----------|
| 1     | 0.621  | 0.343  | 1.043  | 26945307 | 1624710 | 16.58 |      | 100.00 |      | 272.25   | 351872    |
|       |        |        |        | 26945307 | 1624710 |       |      | 100.00 |      |          |           |



FLASH EA 1112 SERIES CHN REPORT  
SCHOOL OF CHEMISTRY  
UNIVERSITY OF HYDERABAD

Method filename: C:\Program Files\Thermo Finnigan\Eager 300 for EA1112\DATA\Sys\_data\_ex  
Sample ID: SKG-658 (# 144)  
Analysis type: UnkNown  
Chromatogram filename: UNK-18022015-4.dat  
Sample weight: 1.307

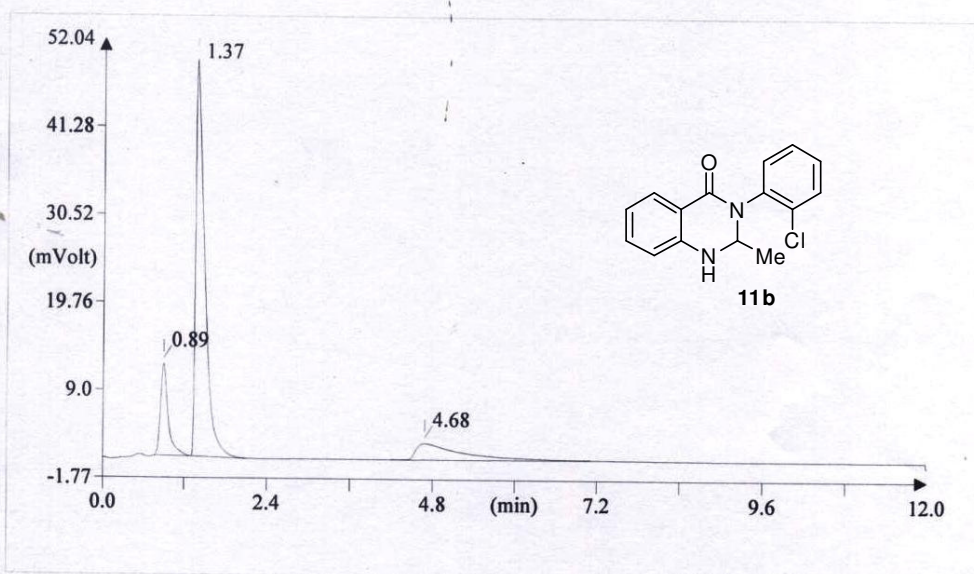

| Element Name | Element % | Ret. Time |
|--------------|-----------|-----------|
| Nitrogen     | 10.36     | 0.89      |
| Carbon       | 66.15     | 1.37      |
| Hydrogen     | 4.73      | 4.68      |



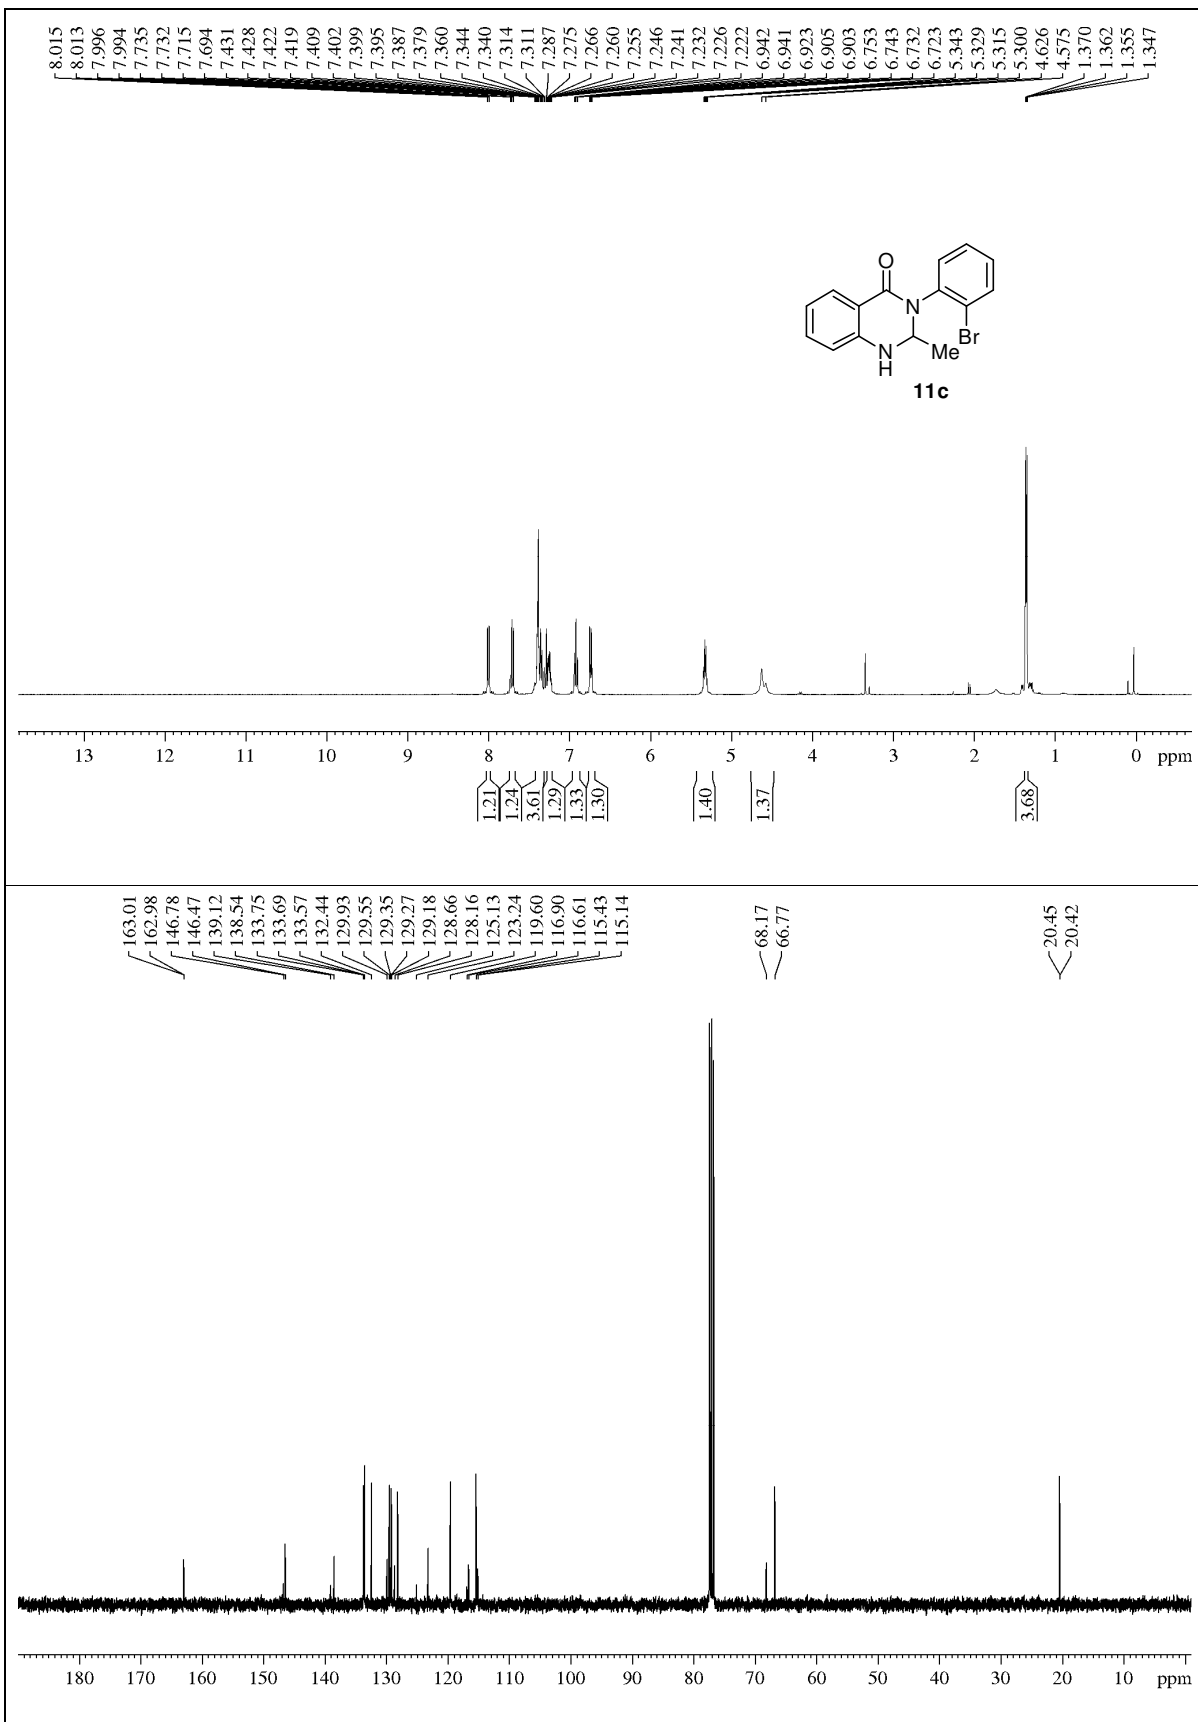

# BRUKER MAXIS HRMS REPORT

School of Chemistry  
University of Hyderabad

## Analysis Info

Analysis Name D:\Data\2015\DrNagarajan\mar\SKG-667.d  
Method TL-P.m  
Sample Name SKG-667-DCM-MEOH  
Comment

Acquisition Date 3/18/2015 1:16:10 PM

Operator Ramu Sridhar  
Instrument maXis 10138

## Acquisition Parameter

|             |            |                       |           |                  |           |
|-------------|------------|-----------------------|-----------|------------------|-----------|
| Source Type | ESI        | Ion Polarity          | Positive  | Set Nebulizer    | 4.4 psi   |
| Focus       | Not active | Set Capillary         | 3800 V    | Set Dry Heater   | 180 °C    |
| Scan Begin  | 50 m/z     | Set End Plate Offset  | -500 V    | Set Dry Gas      | 4.0 l/min |
| Scan End    | 600 m/z    | Set Collision Cell RF | 350.0 Vpp | Set Divert Valve | Waste     |

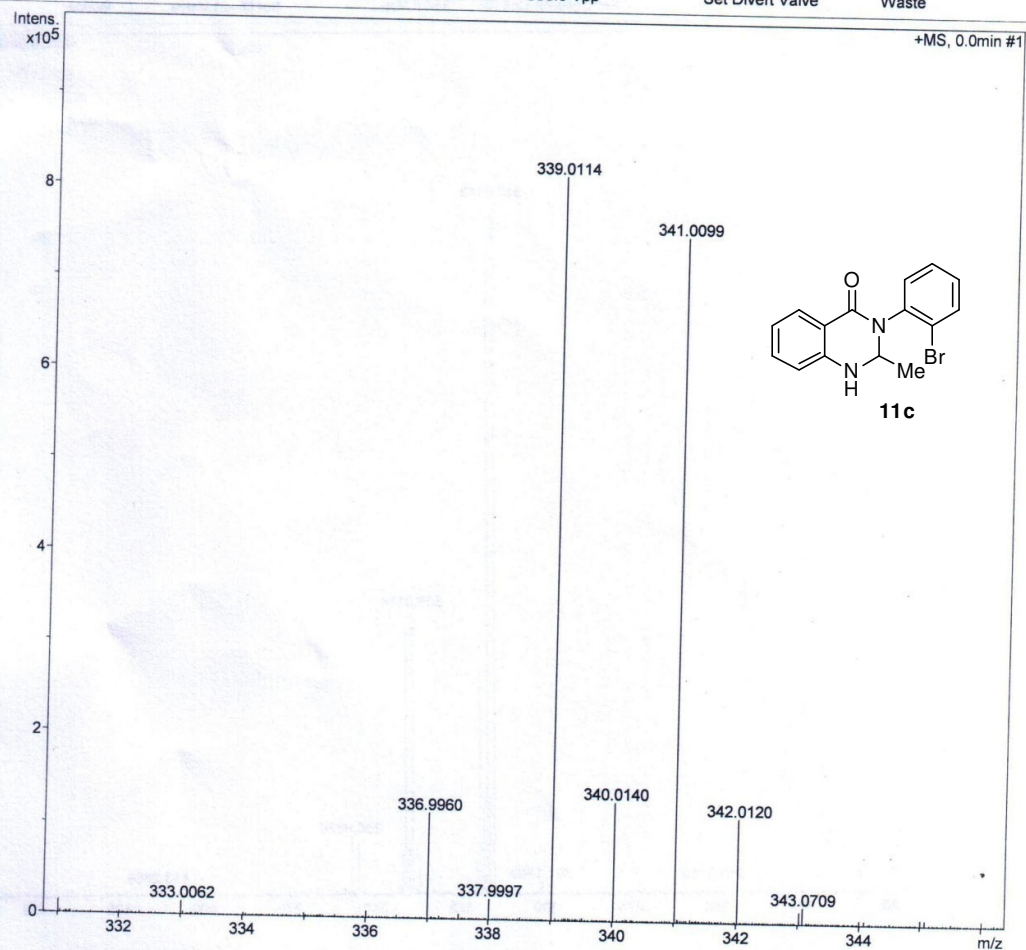

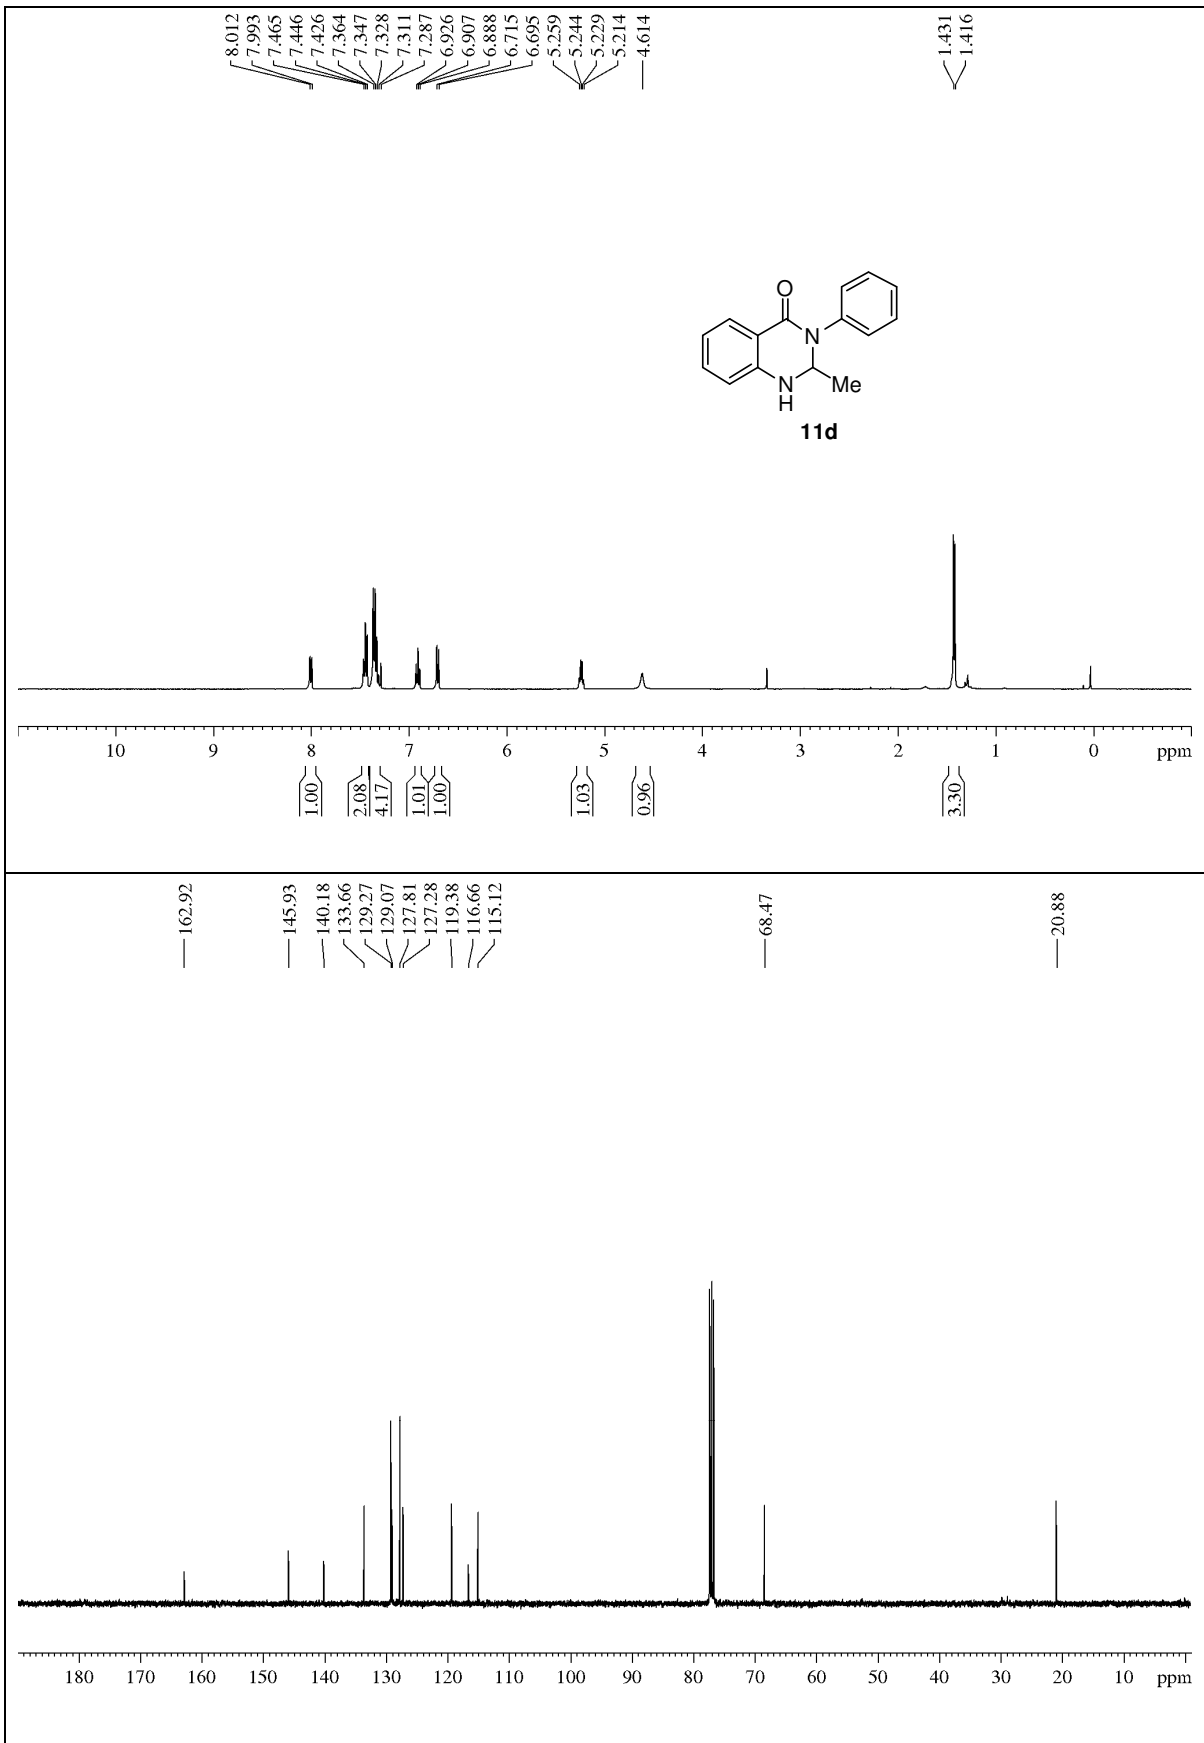

**LCMS-2010A DATA REPORT  
SCHOOL OF CHEMISTRY  
UNIVERSITY OF HYDERABAD**

User : Admin  
 Sample : SKG-657  
 Inj. Volume : 5.000  
 Data Name : C:\LCMSsolution\User\Data\SKG-657-APCI-POS1.qld  
 Method Name : C:\LCMSsolution\User\Method\esi.qlm

MS Spectrum

Line#:1 R.Time:0.786(Scan#:48) Positive  
 MassPeaks:175 BasePeak:239.00(10605560)  
 RawMode:Single 0.786(48)  
 BG Mode:Peak Start 0.543(33)

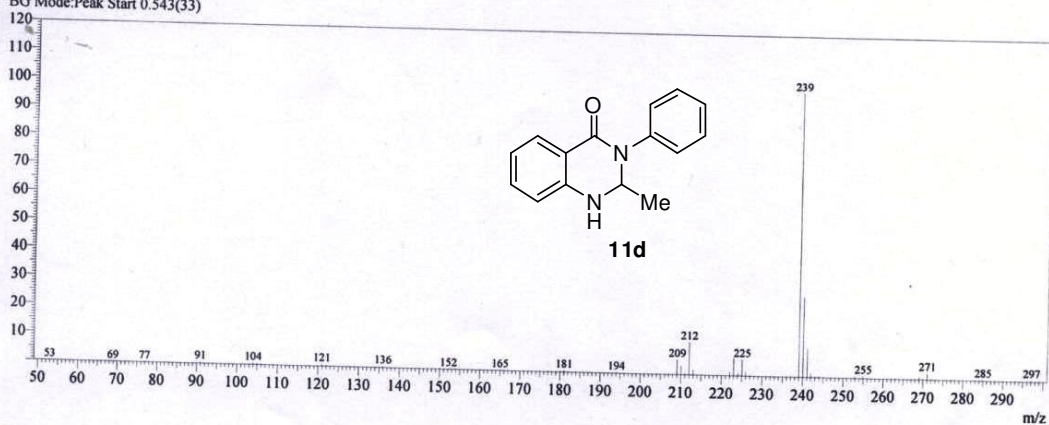

| Peak# | R.Time | I.Time | F.Time | Area      | Height   | A/H   | Mark | %Total | Name | Base m/z | Base Int. |
|-------|--------|--------|--------|-----------|----------|-------|------|--------|------|----------|-----------|
| 1     | 0.786  | 0.543  | 1.043  | 542626652 | 40162806 | 13.51 |      | 100.00 |      | 239.00   | 10605560  |
|       |        |        |        | 542626652 | 40162806 |       |      | 100.00 |      |          |           |

FLASH EA 1112 SERIES CHN REPORT  
SCHOOL OF CHEMISTRY  
UNIVERSITY OF HYDERABAD

Method filename: C:\Program Files\Thermo Finnigan\Eager 300 for EA1112\DATA\Sys\_data\_ex  
Sample ID: SKG-657 (# 157)  
Analysis type: UnkNown  
Chromatogram filename: UNK-18022015-17.dat  
Sample weight: 1.226

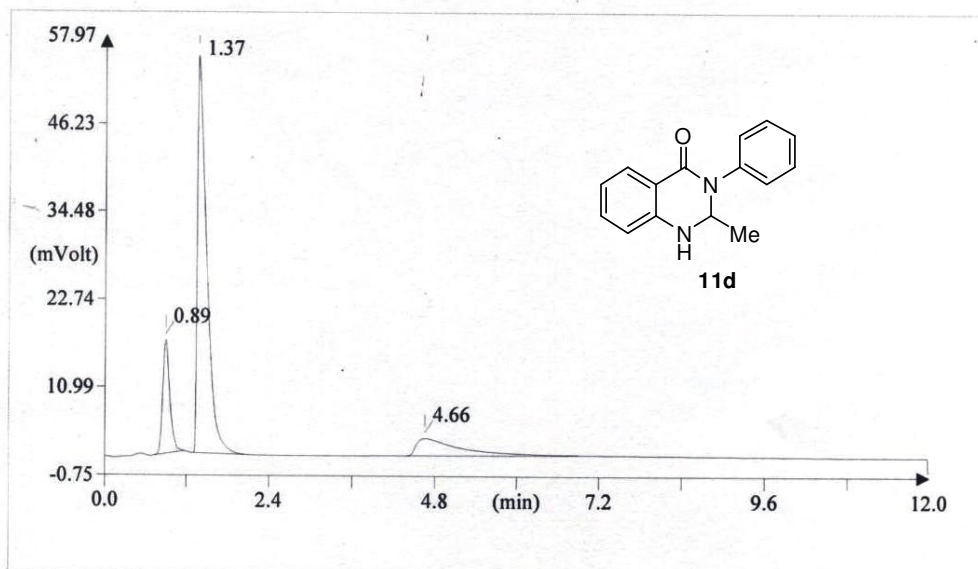

| Element Name | Element % | Ret. Time |
|--------------|-----------|-----------|
| Nitrogen     | 11.65     | 0.89      |
| Carbon       | 75.52     | 1.37      |
| Hydrogen     | 6.07      | 4.66      |

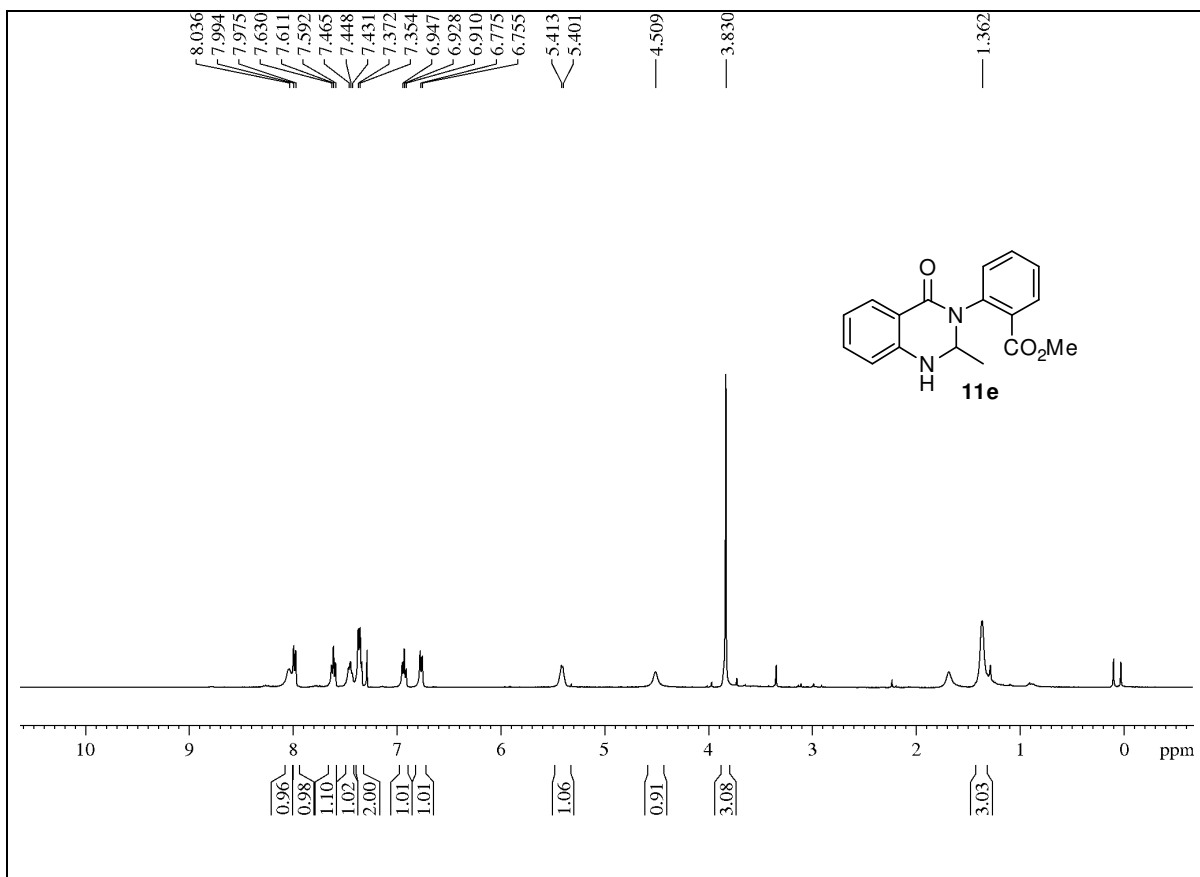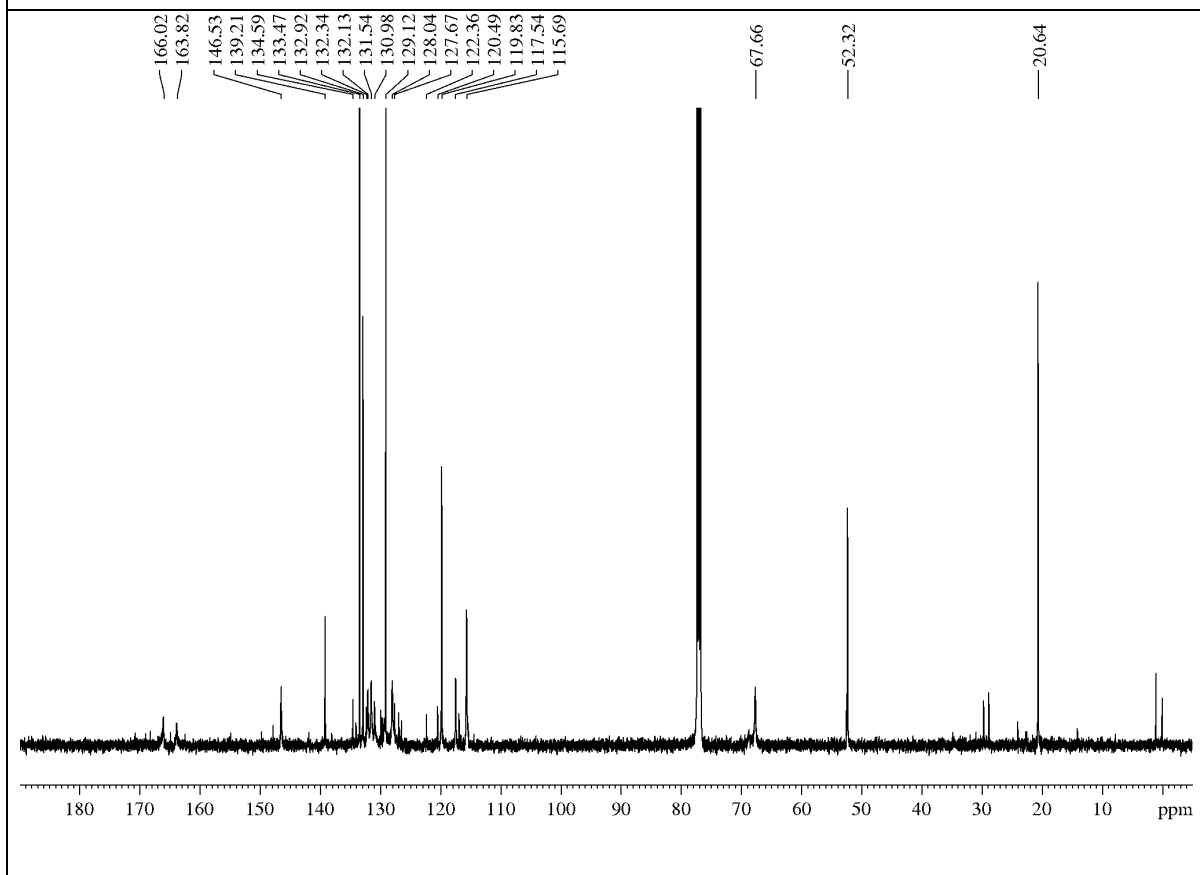



# BRUKER MAXIS HRMS REPORT

School of Chemistry  
University of Hyderabad

## Analysis Info

Analysis Name D:\Data\2015\DrNagarajan\FEB\SKG-688.d  
Method TL-P.m  
Sample Name SKG-688-DCM-MEOH  
Comment

Acquisition Date 2/23/2015 12:39:19 PM

Operator Ramu Sridhar  
Instrument maXis 10138

## Acquisition Parameter

|             |            |                       |           |                  |           |
|-------------|------------|-----------------------|-----------|------------------|-----------|
| Source Type | ESI        | Ion Polarity          | Positive  | Set Nebulizer    | 0.3 Bar   |
| Focus       | Not active | Set Capillary         | 3800 V    | Set Dry Heater   | 180 °C    |
| Scan Begin  | 50 m/z     | Set End Plate Offset  | -500 V    | Set Dry Gas      | 4.0 l/min |
| Scan End    | 600 m/z    | Set Collision Cell RF | 350.0 Vpp | Set Divert Valve | Waste     |

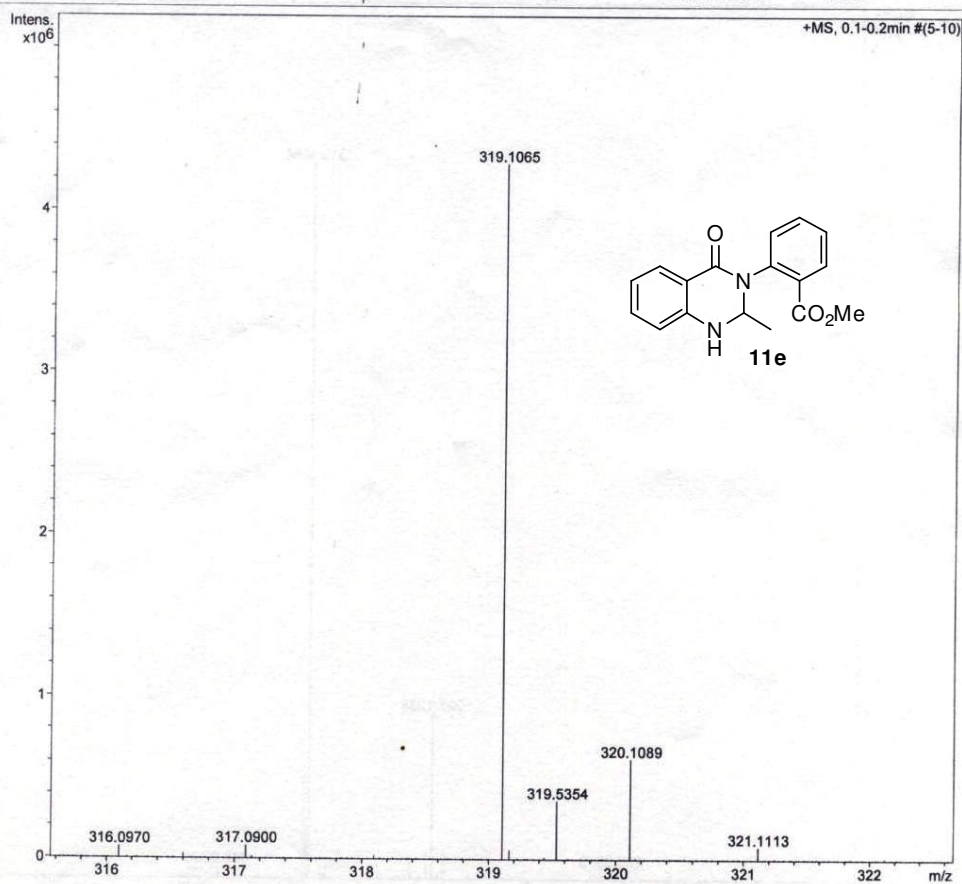

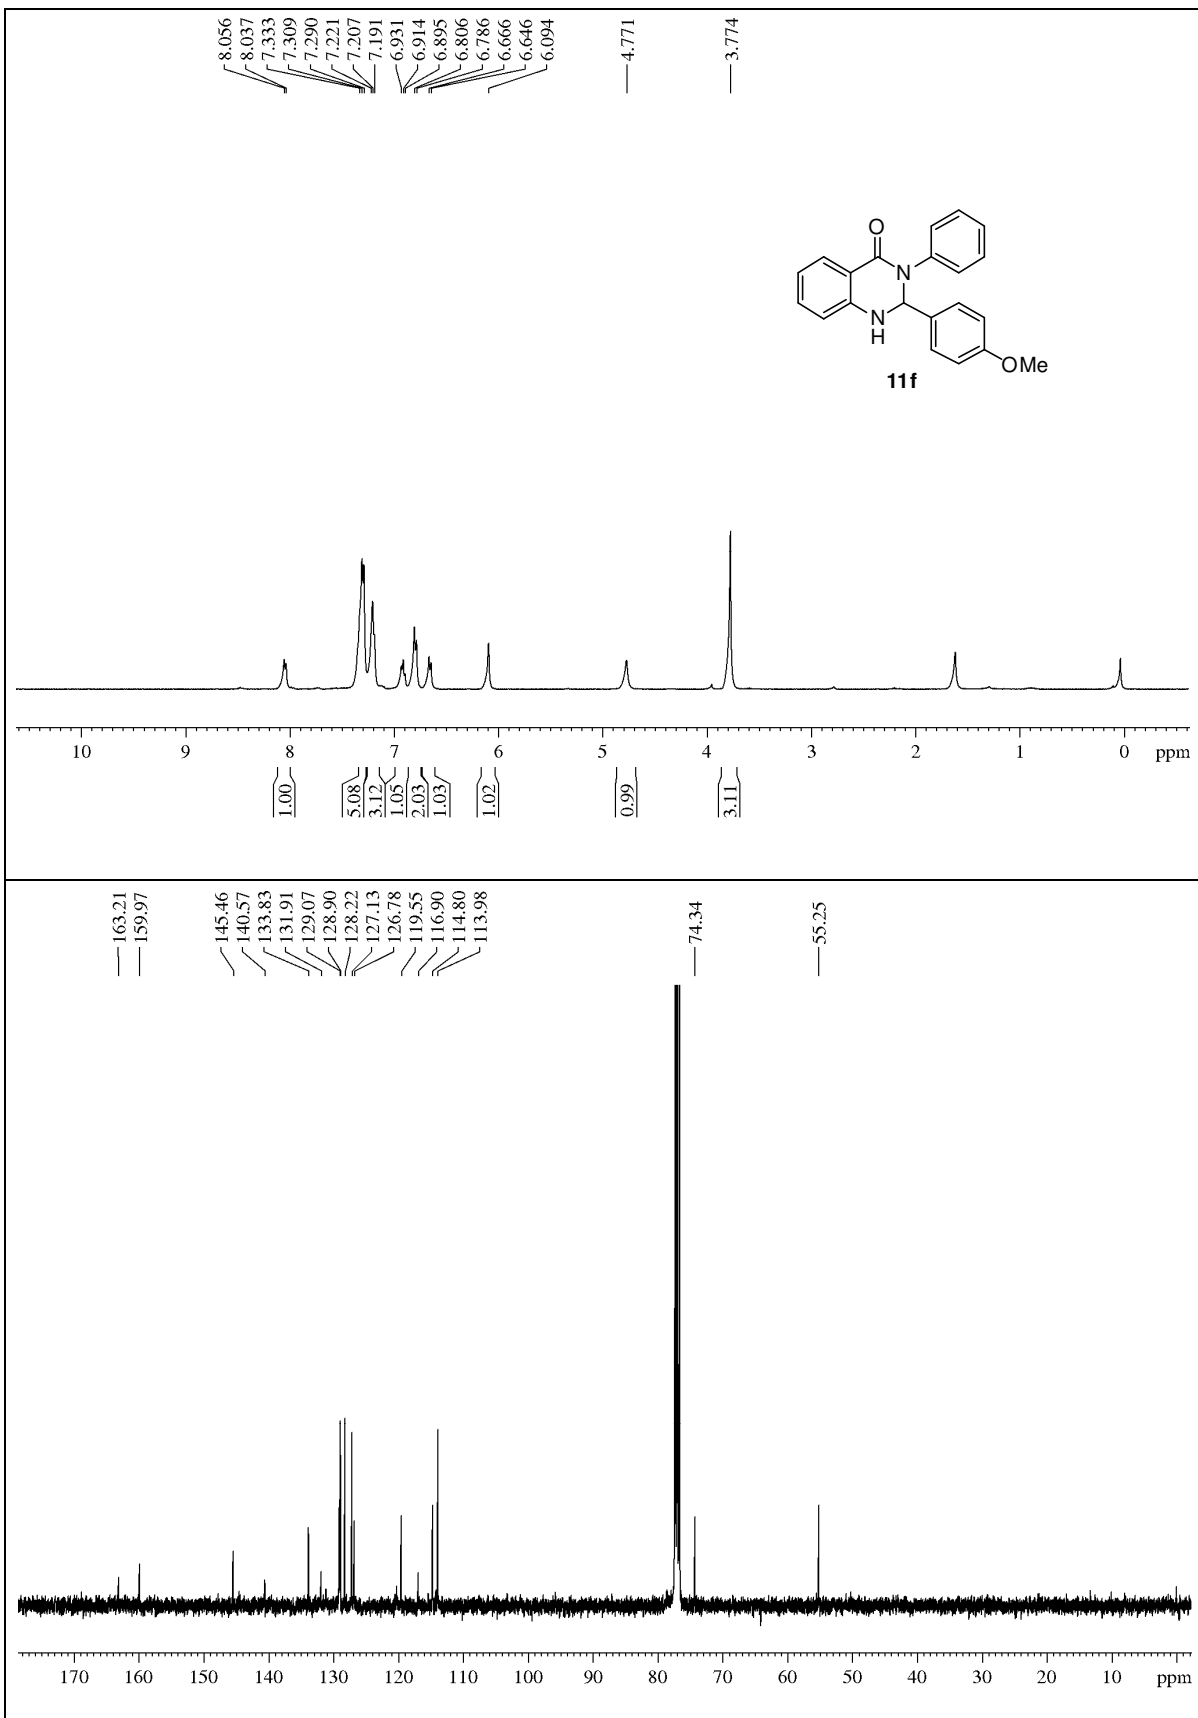

**LCMS-2010A DATA REPORT  
SCHOOL OF CHEMISTRY  
UNIVERSITY OF HYDERABAD**

User : Admin  
 Sample : SKG-670  
 Inj. Volume : 5.000  
 Data Name : C:\LCMSsolution\User\Data\SKG-670-APCI-POS1.qld  
 Method Name : C:\LCMSsolution\User\Method\esi.qlm

MS Spectrum

Line#:1 R.Time:0.828(Scan#:50) Positive  
 MassPeaks:318 BasePeak:331.25(6821119)  
 RawMode:Single 0.828(50)  
 BG Mode:Peak Start 0.627(38)

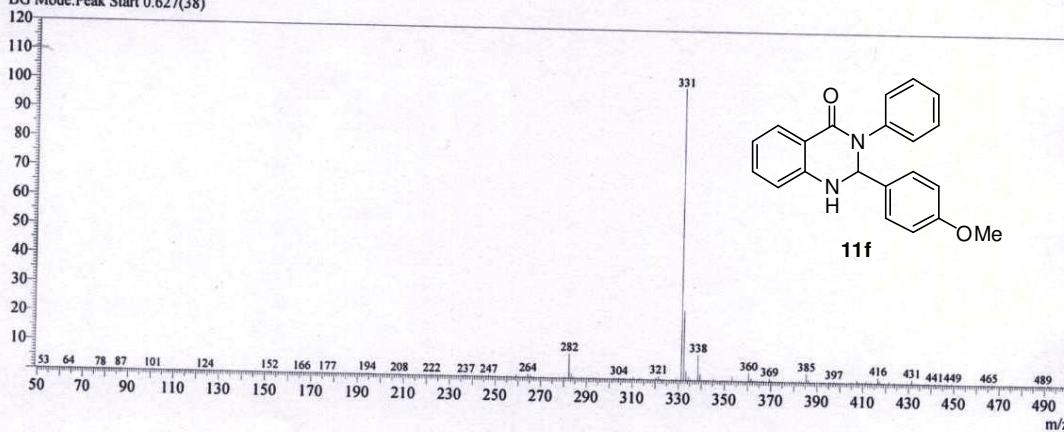

| Peak# | R.Time | I.Time | F.Time | Area      | Height   | A/H   | Mark | %Total | Name |
|-------|--------|--------|--------|-----------|----------|-------|------|--------|------|
| 1     | 0.828  | 0.627  | 1.093  | 118182453 | 10608738 | 11.14 |      | 100.00 |      |

Base m/z Base Int.  
 331.25 6821119

FLASH EA 1112 SERIES CHN REPORT  
SCHOOL OF CHEMISTRY  
UNIVERSITY OF HYDERABAD

Method filename: C:\Program Files\Thermo Finnigan\Eager 300 for EA1112\DATA\Sys\_data\_ex  
Sample ID: SKG-670 (# 150)  
Analysis type: UnkNown  
Chromatogram filename: UNK-18022015-10.dat  
Sample weight: 1.483

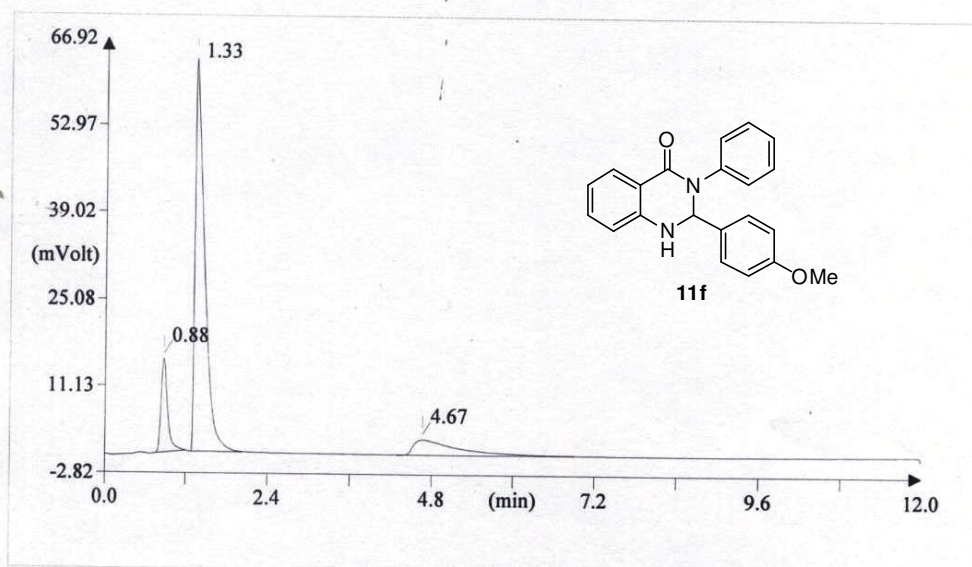

| Element Name | Element % | Ret. Time |
|--------------|-----------|-----------|
| Nitrogen     | 8.56      | 0.88      |
| Carbon       | 76.25     | 1.33      |
| Hydrogen     | 5.41      | 4.67      |

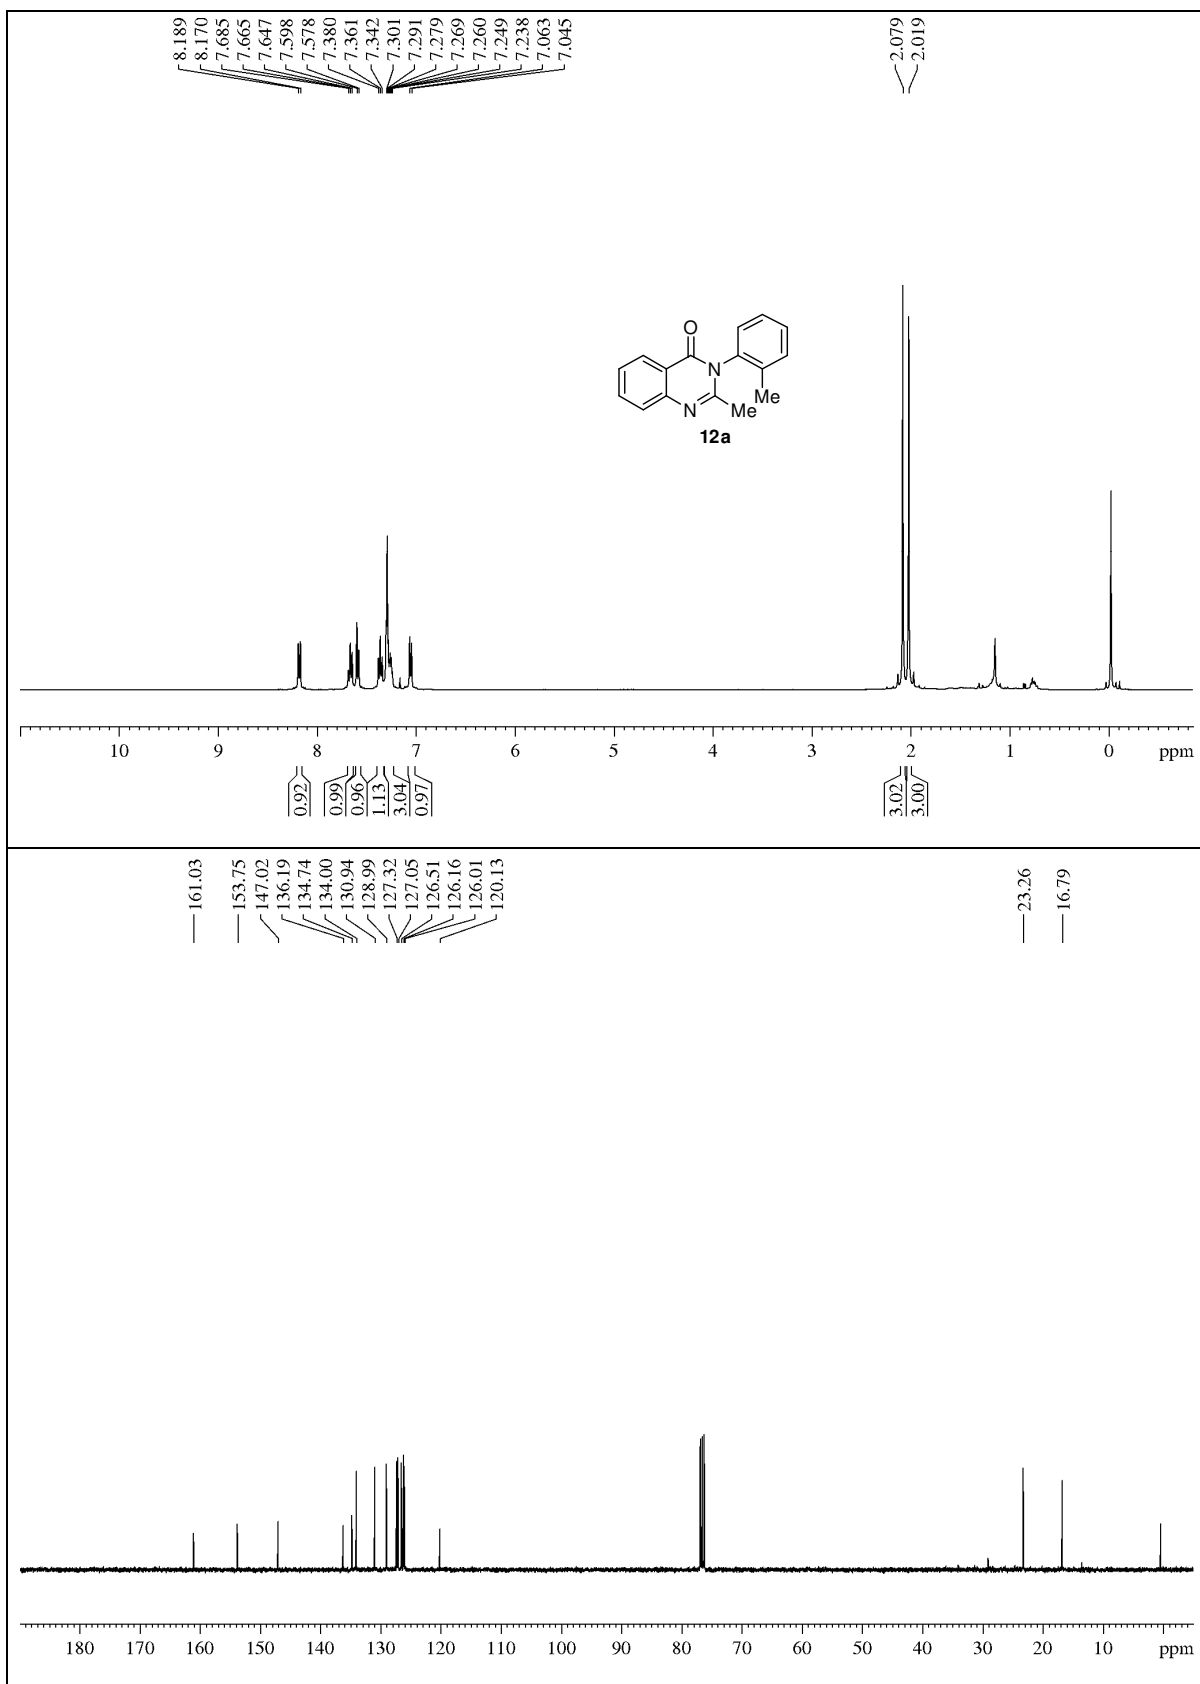



# BRUKER MAXIS HRMS REPORT

School of Chemistry  
University of Hyderabad

## Analysis Info

Analysis Name D:\Data\2015\DrNagarajan\mar\SKG-698R.d  
Method tune\_low\_Pos.m  
Sample Name SKG-698-DCM-MEOH  
Comment

Acquisition Date 3/18/2015 1:06:21 PM

Operator Ramu Sridhar  
Instrument maXis 10138

## Acquisition Parameter

|             |            |                       |           |                  |           |
|-------------|------------|-----------------------|-----------|------------------|-----------|
| Source Type | ESI        | Ion Polarity          | Positive  | Set Nebulizer    | 4.4 psi   |
| Focus       | Not active | Set Capillary         | 3800 V    | Set Dry Heater   | 180 °C    |
| Scan Begin  | 50 m/z     | Set End Plate Offset  | -500 V    | Set Dry Gas      | 4.0 l/min |
| Scan End    | 1500 m/z   | Set Collision Cell RF | 350.0 Vpp | Set Divert Valve | Waste     |

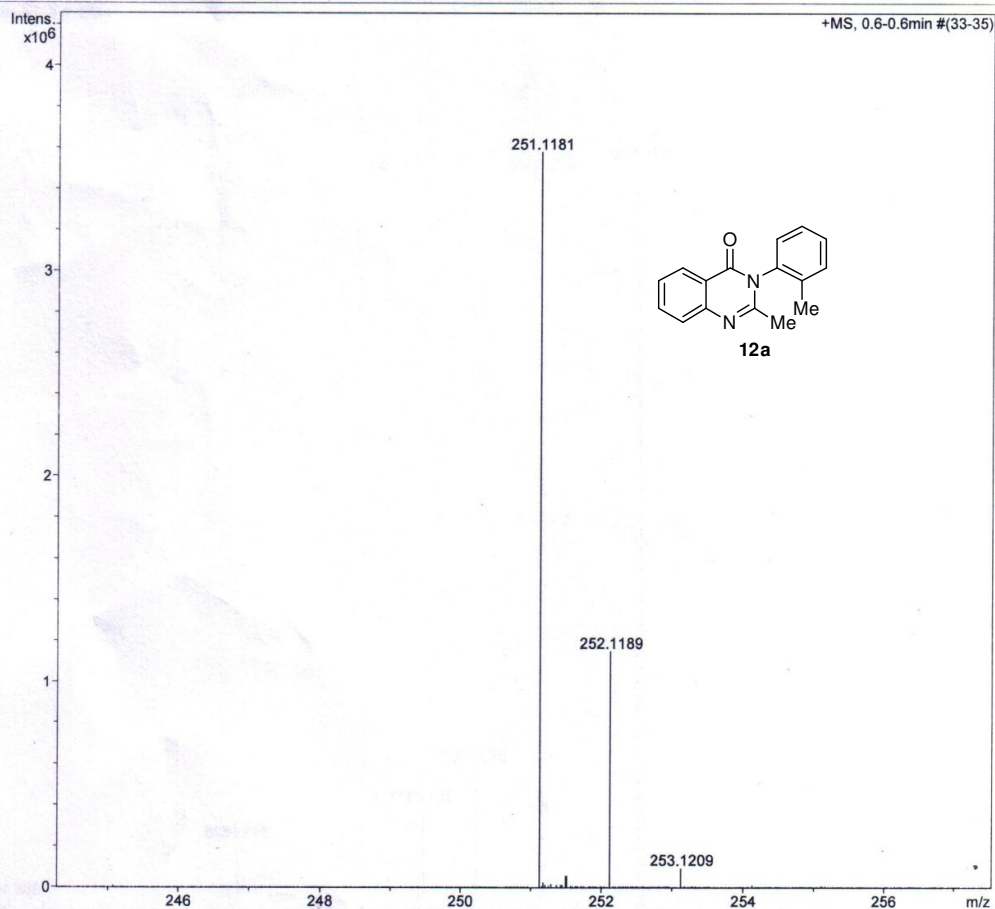



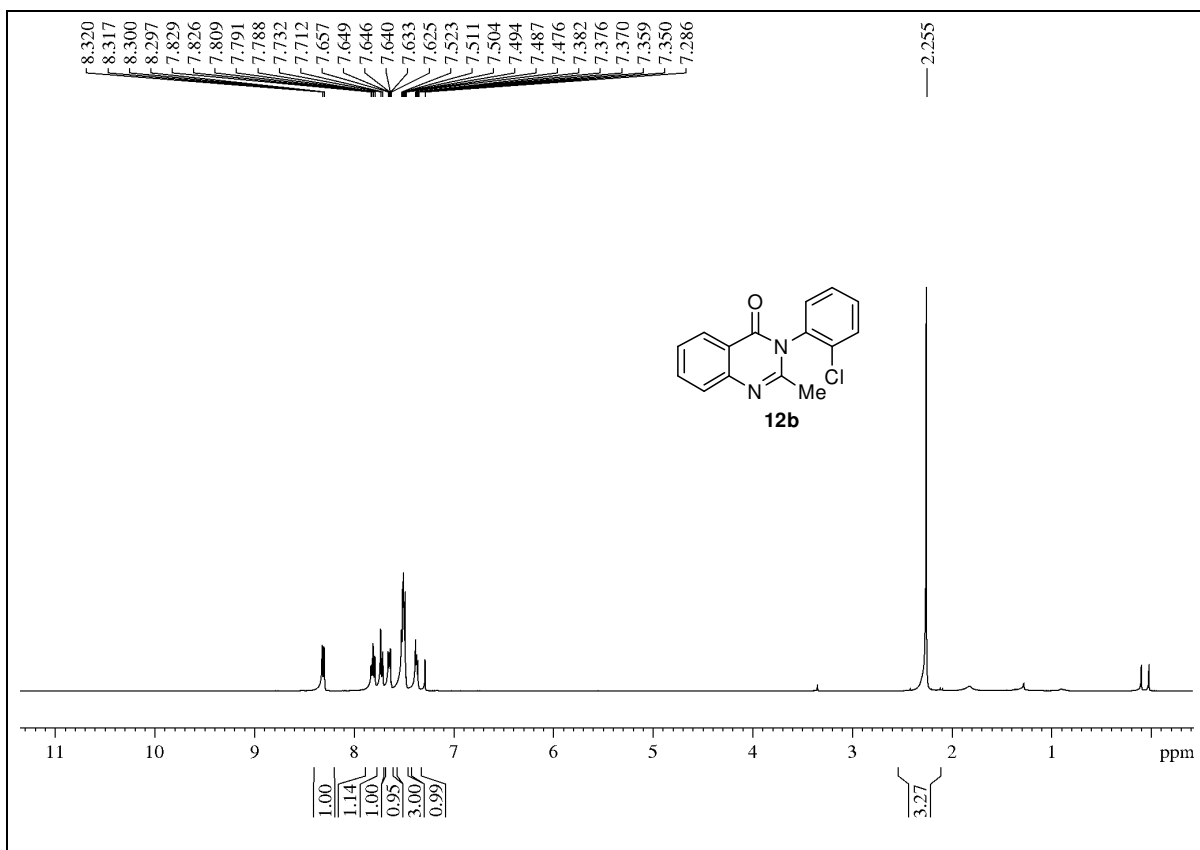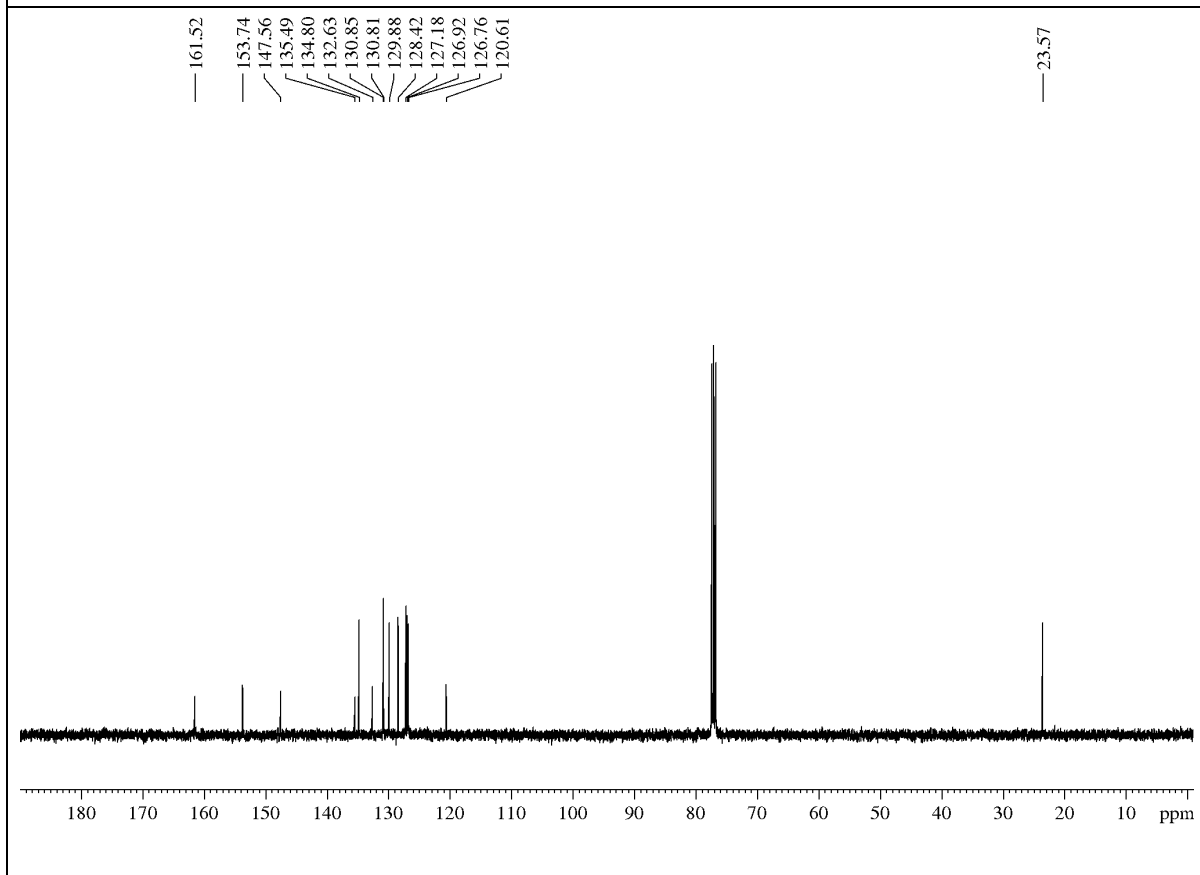

LCMS-2010A DATA REPORT  
SCHOOL OF CHEMISTRY  
UNIVERSITY OF HYDERABAD

User : Admin  
Sample : SKG-663  
Inj. Volume : 5.000  
Data Name : G:\LCMSSolution\User\Data\SKG-663-APCI-POS1.qld  
Method Name : C:\LCMSSolution\User\Method\Copy of JAY-4-APCI.qlm

MS Spectrum

Line#:1 R.Time:0.638(Scan#:39) Positive  
MassPeaks:269 BasePeak:270.60(6372491)  
RawMode:Single 0.638(39)  
BG Mode:Peak Start 0.443(27)

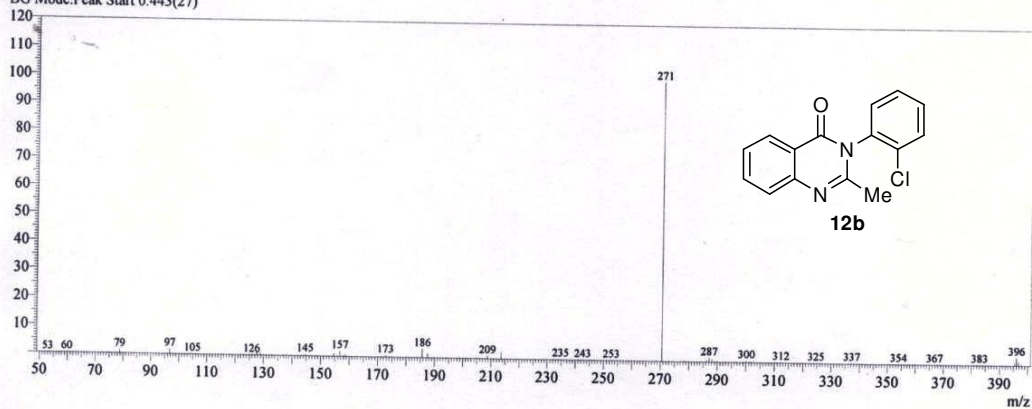

| Peak# | R.Time | I.Time | F.Time | Area     | Height  | A/H  | Mark | %Total | Name | Base m/z | Base Int. |
|-------|--------|--------|--------|----------|---------|------|------|--------|------|----------|-----------|
| 1     | 0.638  | 0.443  | 0.793  | 91618087 | 9861805 | 9.29 |      | 100.00 |      | 270.60   | 6372491   |
|       |        |        |        | 91618087 | 9861805 |      |      | 100.00 |      |          |           |

FLASH EA 1112 SERIES CHN REPORT  
SCHOOL OF CHEMISTRY  
UNIVERSITY OF HYDERABAD

Method filename: C:\Program Files\Thermo Finnigan\Eager 300 for EA1112\DATA\Sys\_data\_ex  
Sample ID: SKG-663 (# 154)  
Analysis type: UnkNqwn  
Chromatogram filename: UNK-18022015-14.dat  
Sample weight: 1.316

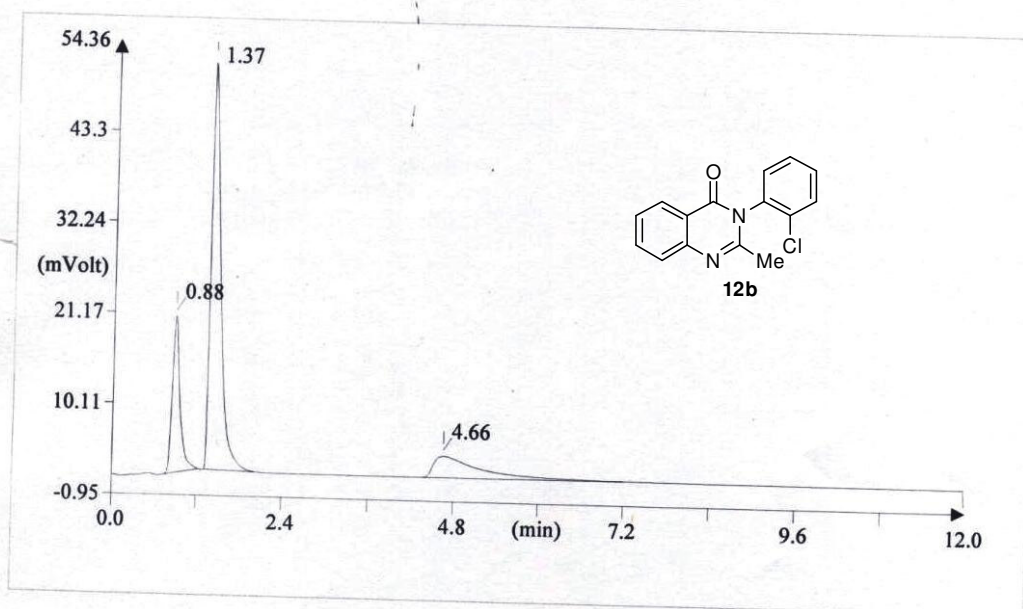

| Element Name | Element % | Ret. Time |
|--------------|-----------|-----------|
| Nitrogen     | 10.26     | 0.88      |
| Carbon       | 66.42     | 1.37      |
| Hydrogen     | 4.18      | 4.66      |

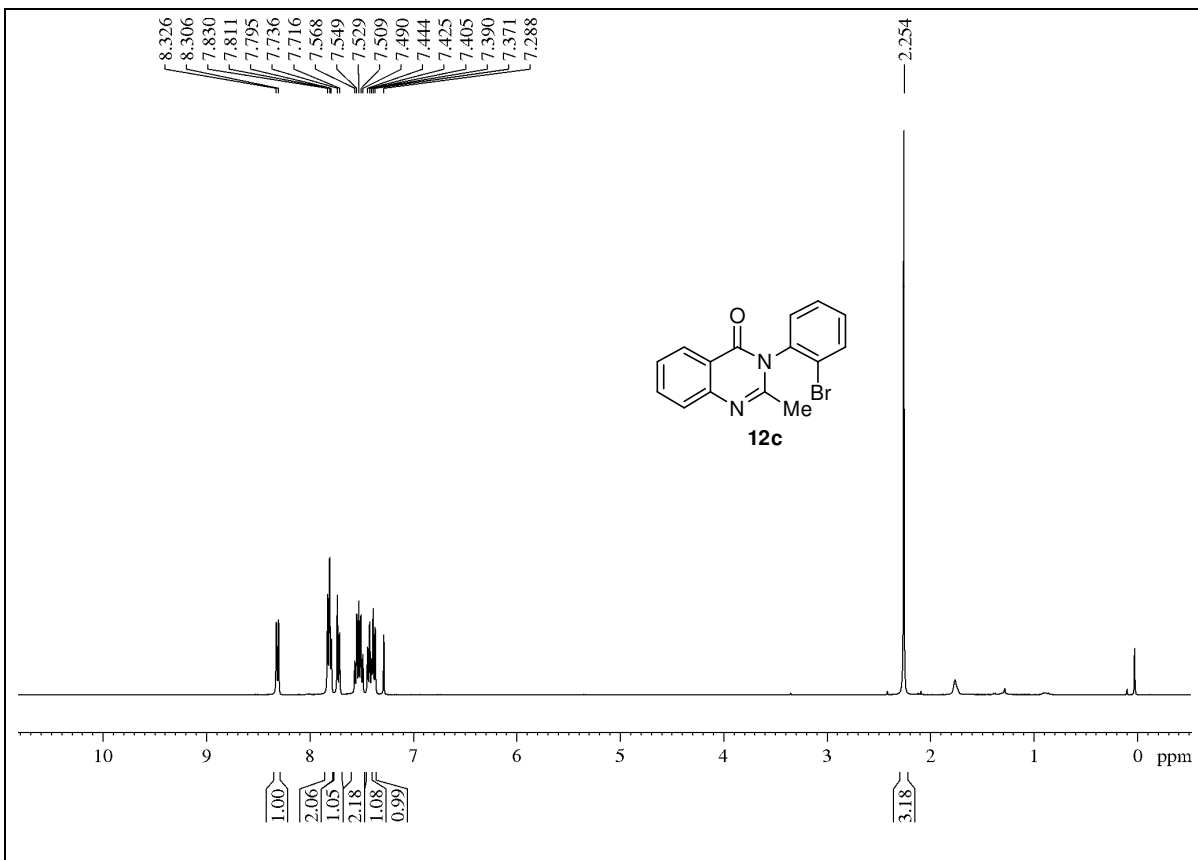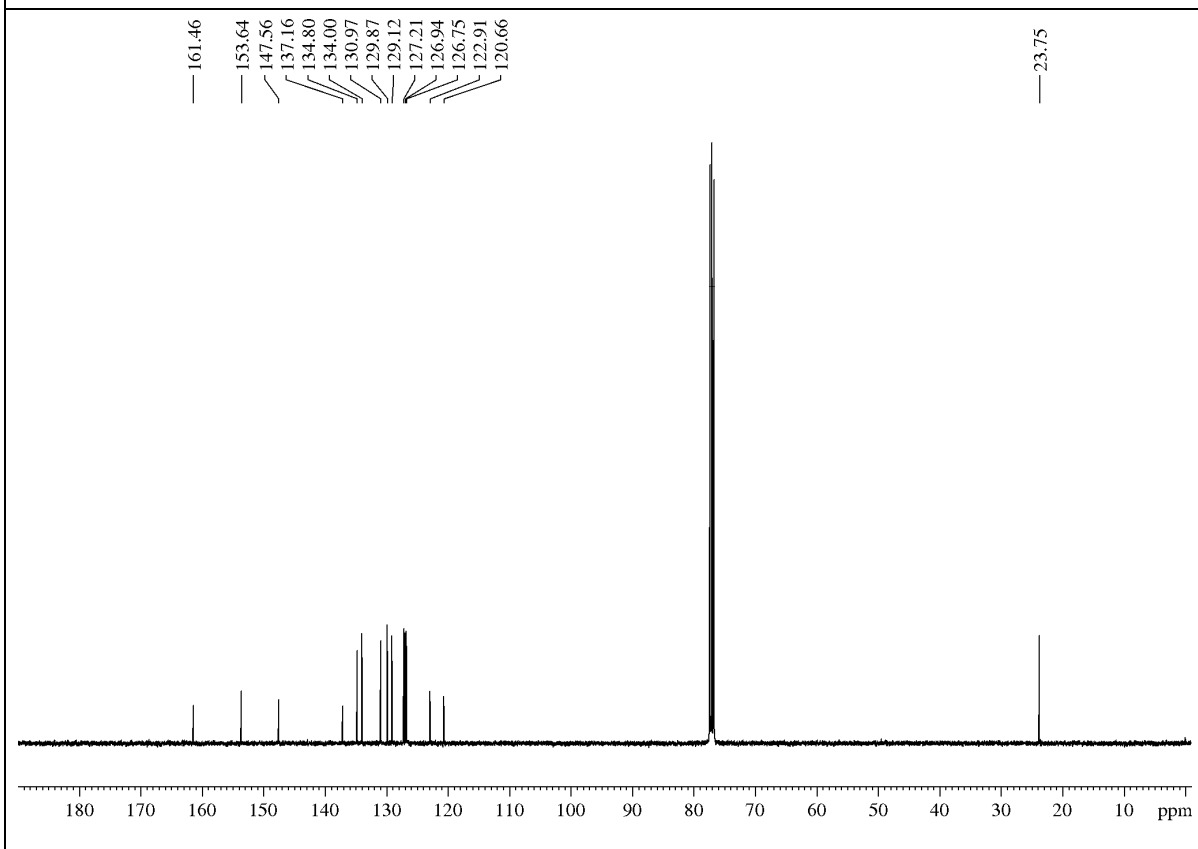

# BRUKER MAXIS HRMS REPORT

School of Chemistry  
University of Hyderabad

## Analysis Info

Analysis Name D:\Data\2015\DrNagarajan\FEB\SKG-668.d  
Method tune\_low\_Pos.m  
Sample Name SKG-668-DCM-MEOH  
Comment

Acquisition Date 2/23/2015 1:16:47 PM

Operator Ramu Sridhar  
Instrument maXis 10138

## Acquisition Parameter

|             |            |                       |           |                  |           |
|-------------|------------|-----------------------|-----------|------------------|-----------|
| Source Type | ESI        | Ion Polarity          | Positive  | Set Nebulizer    | 0.6 Bar   |
| Focus       | Not active | Set Capillary         | 3800 V    | Set Dry Heater   | 180 °C    |
| Scan Begin  | 50 m/z     | Set End Plate Offset  | -500 V    | Set Dry Gas      | 6.0 l/min |
| Scan End    | 1500 m/z   | Set Collision Cell RF | 350.0 Vpp | Set Divert Valve | Waste     |

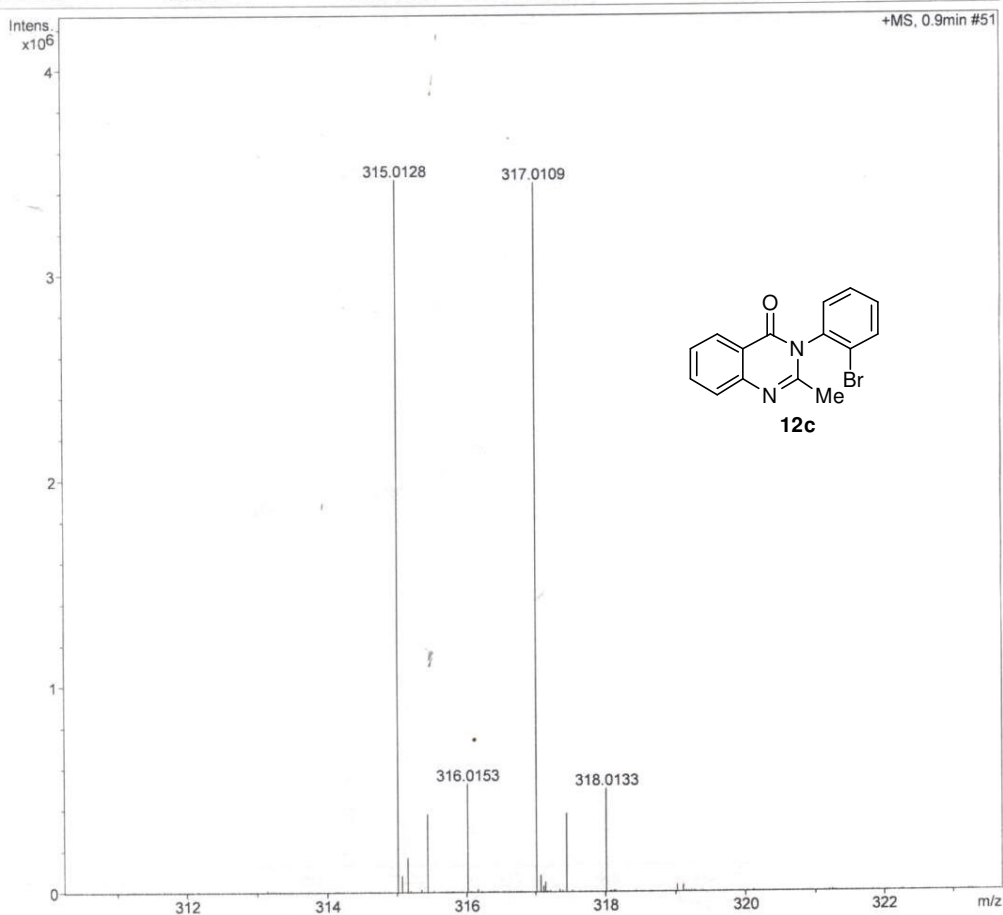

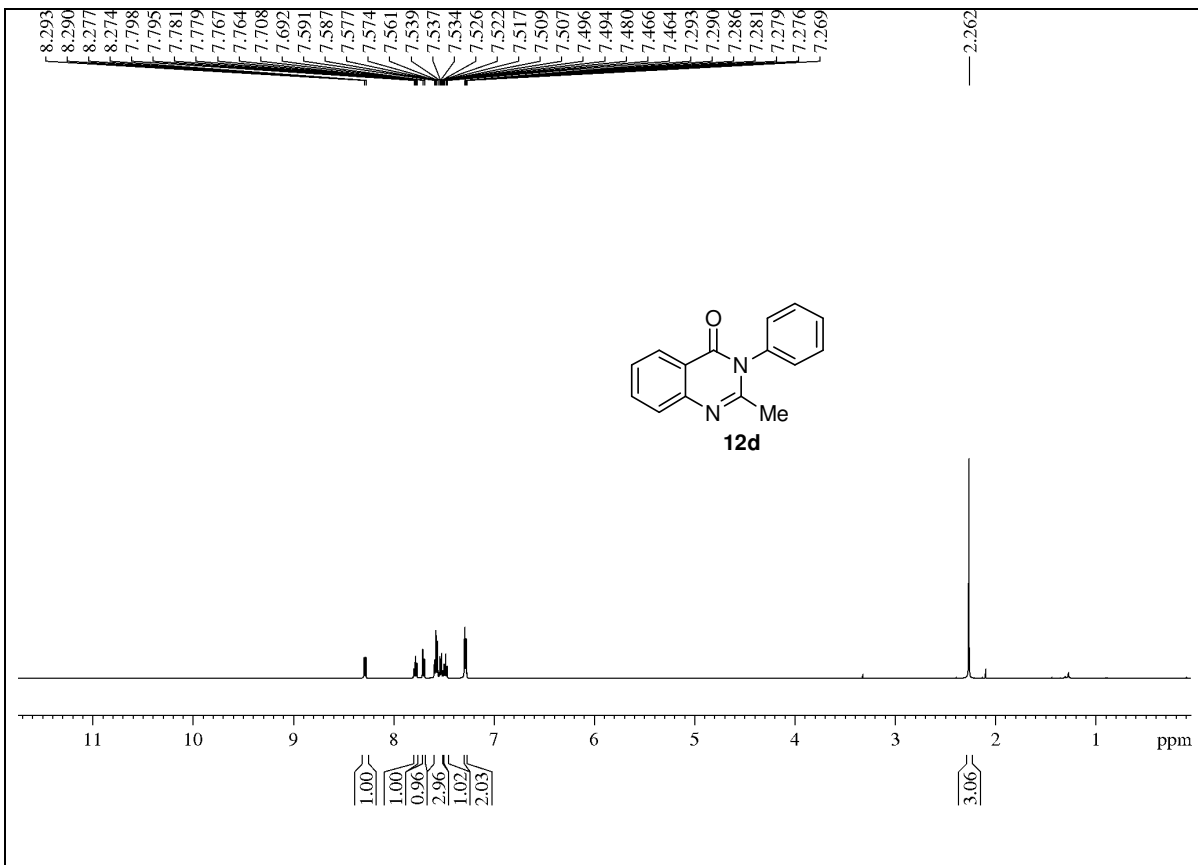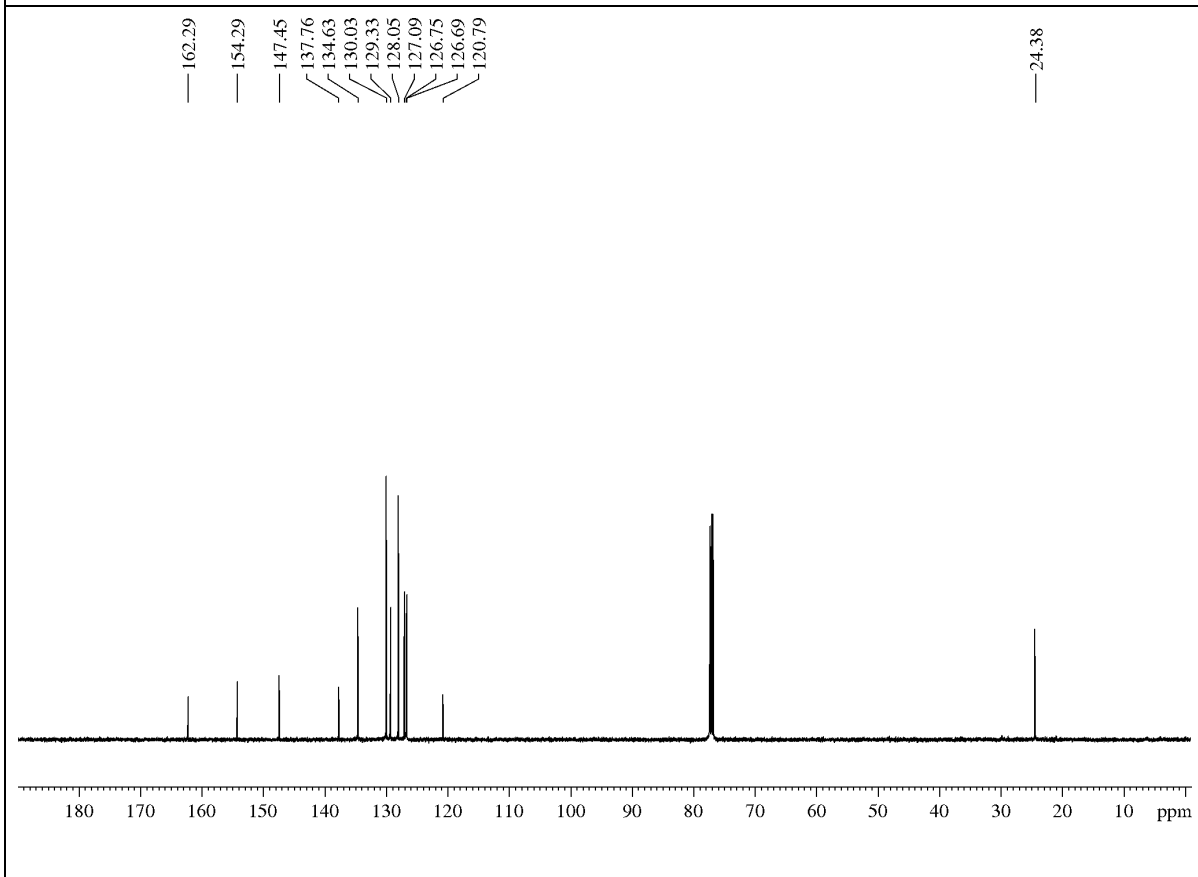



# BRUKER MAXIS HRMS REPORT

School of Chemistry  
University of Hyderabad

## Analysis Info

Analysis Name D:\Data\2015\DrNagarajan\FEB\SKG-660.d  
Method TL-P.m  
Sample Name SKG-660-DCM-MEOH  
Comment

Acquisition Date 2/23/2015 11:21:17 AM

Operator Ramu Sridhar  
Instrument maXis 10138

## Acquisition Parameter

|             |            |                       |           |                  |           |
|-------------|------------|-----------------------|-----------|------------------|-----------|
| Source Type | ESI        | Ion Polarity          | Positive  | Set Nebulizer    | 0.3 Bar   |
| Focus       | Not active | Set Capillary         | 3800 V    | Set Dry Heater   | 180 °C    |
| Scan Begin  | 50 m/z     | Set End Plate Offset  | -500 V    | Set Dry Gas      | 4.0 l/min |
| Scan End    | 600 m/z    | Set Collision Cell RF | 350.0 Vpp | Set Divert Valve | Waste     |

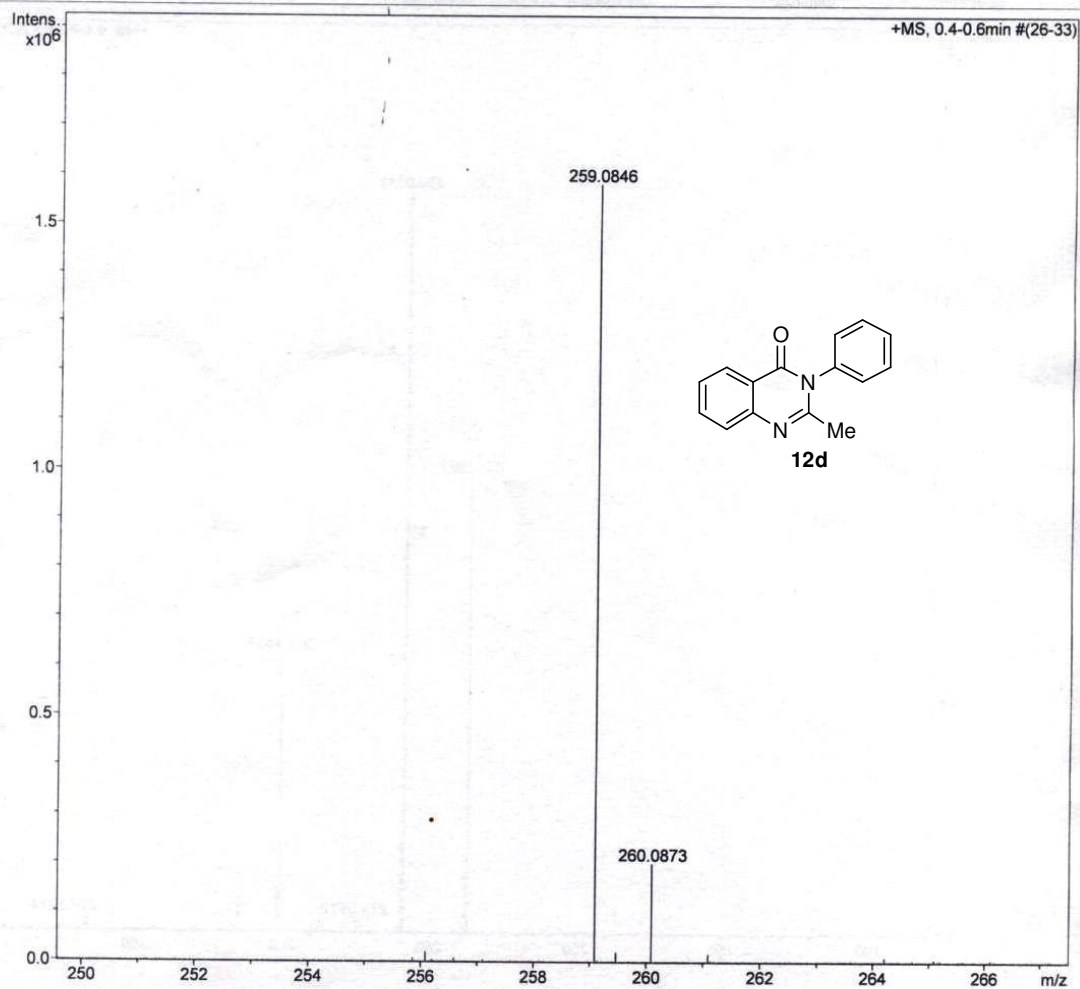

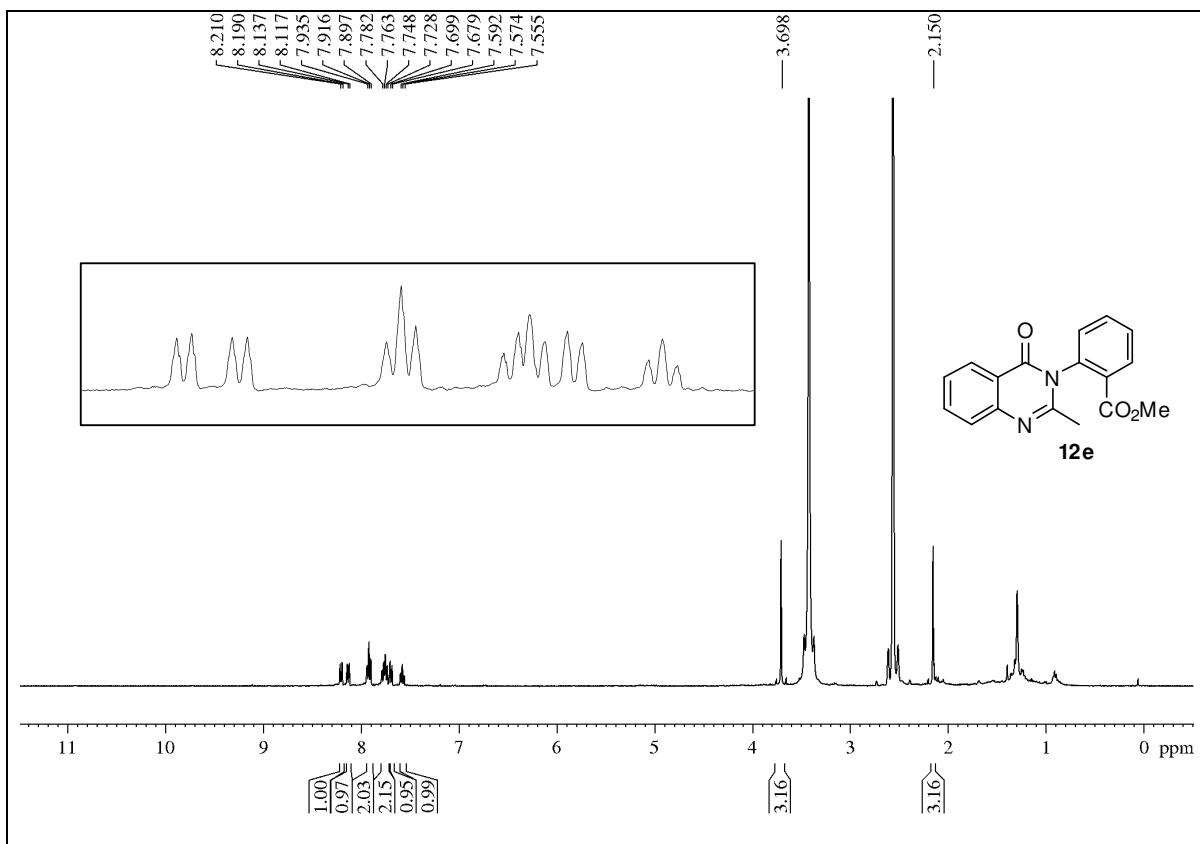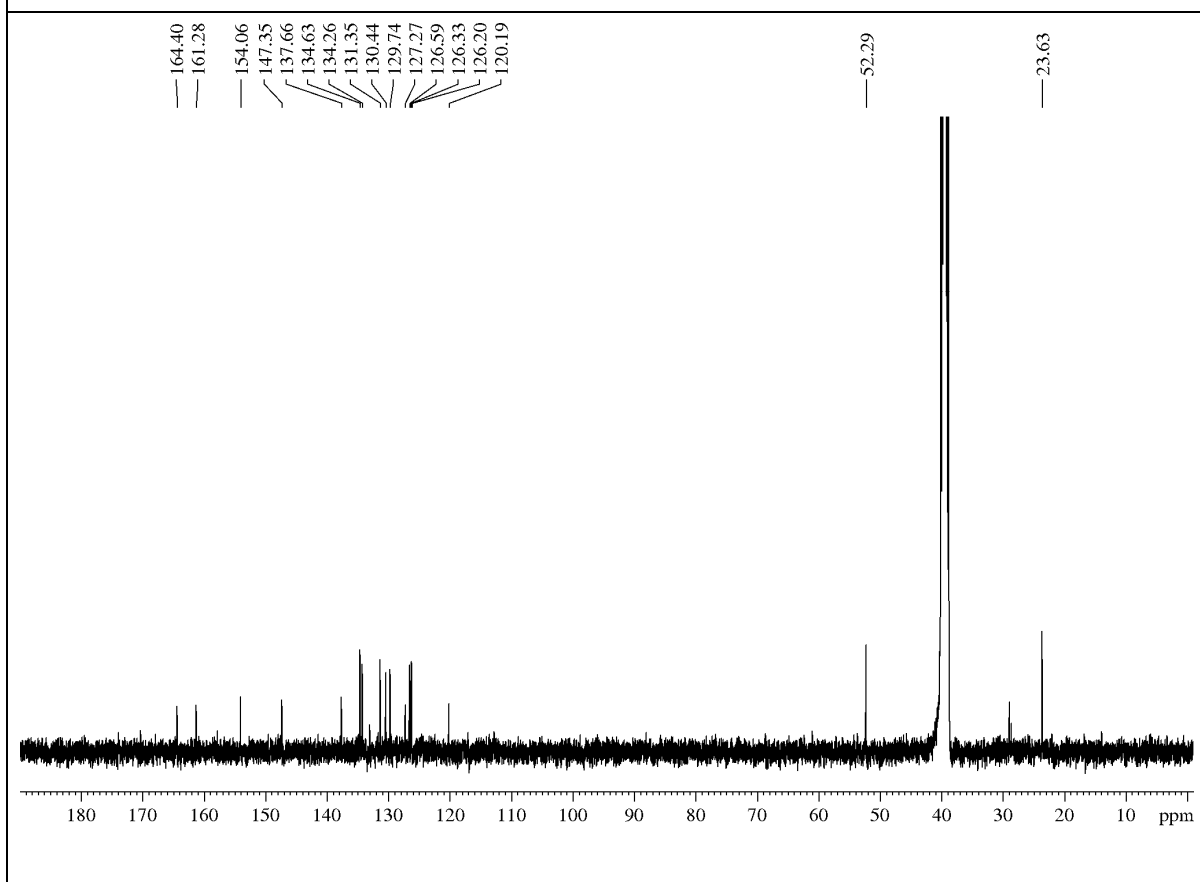

# BRUKER MAXIS HRMS REPORT

School of Chemistry  
University of Hyderabad

## Analysis Info

Analysis Name D:\Data\2015\DrNagarajan\JUNE\SKG-701.d  
Method tune\_low.m  
Sample Name SKG-701-DCM-MEOH  
Comment

Acquisition Date 6/29/2015 1:02:12 PM

Operator Ramu Sridhar  
Instrument maXis 10138

## Acquisition Parameter

|             |            |                       |           |                  |           |
|-------------|------------|-----------------------|-----------|------------------|-----------|
| Source Type | ESI        | Ion Polarity          | Positive  | Set Nebulizer    | 4.4 psi   |
| Focus       | Not active | Set Capillary         | 4500 V    | Set Dry Heater   | 200 °C    |
| Scan Begin  | 50 m/z     | Set End Plate Offset  | -500 V    | Set Dry Gas      | 4.0 l/min |
| Scan End    | 1800 m/z   | Set Collision Cell RF | 350.0 Vpp | Set Divert Valve | Waste     |

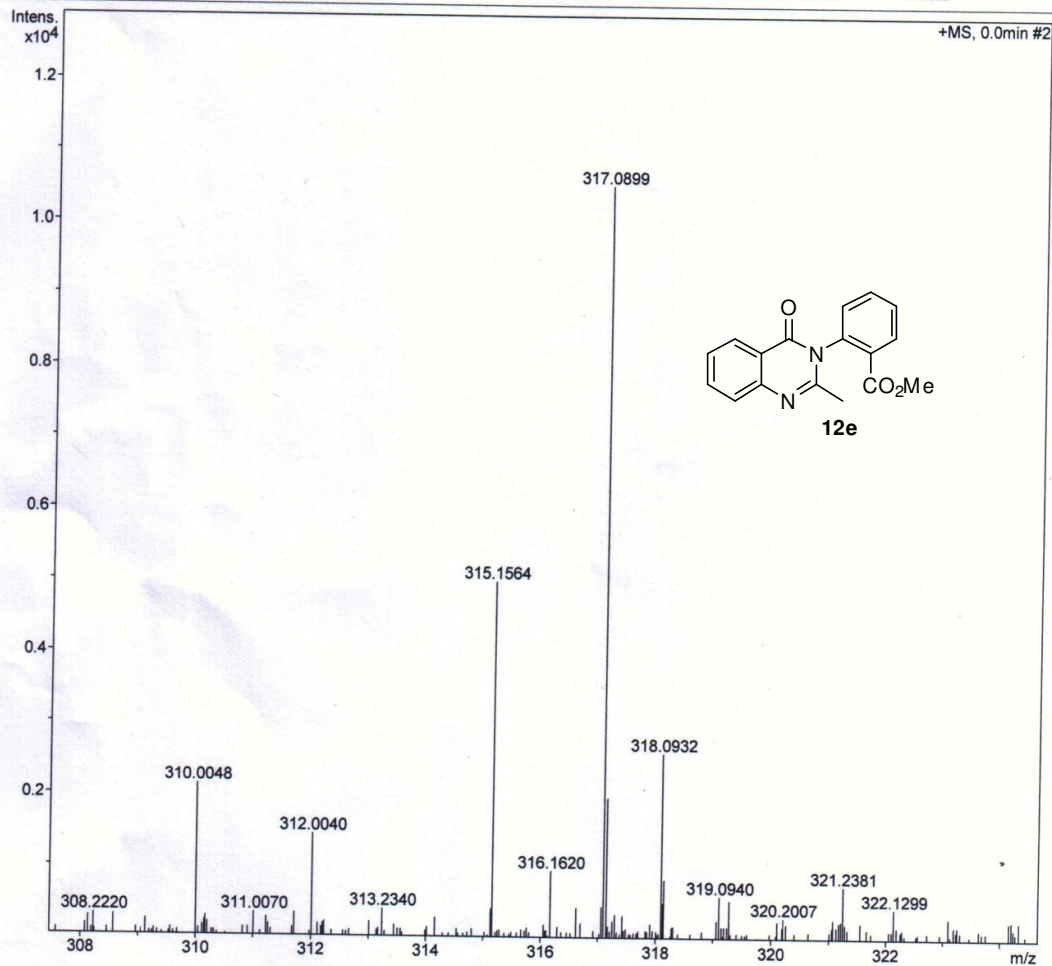

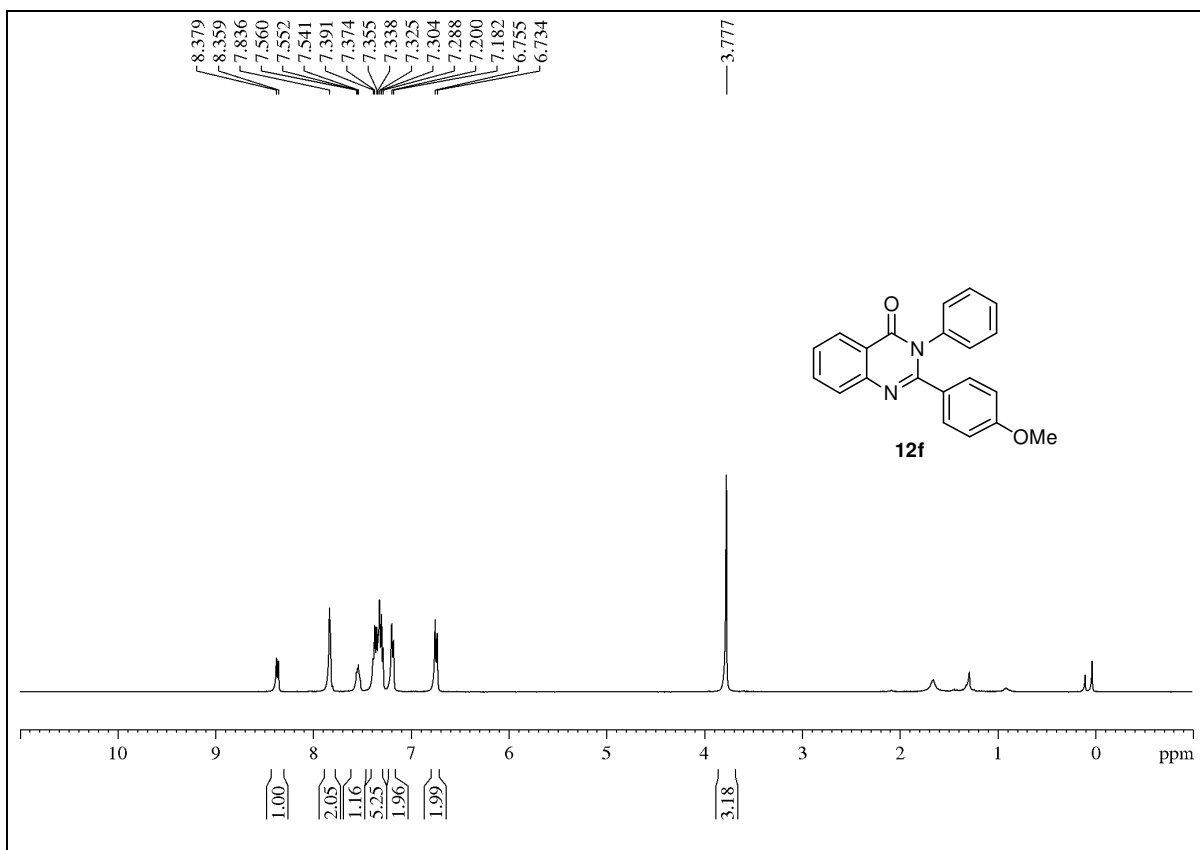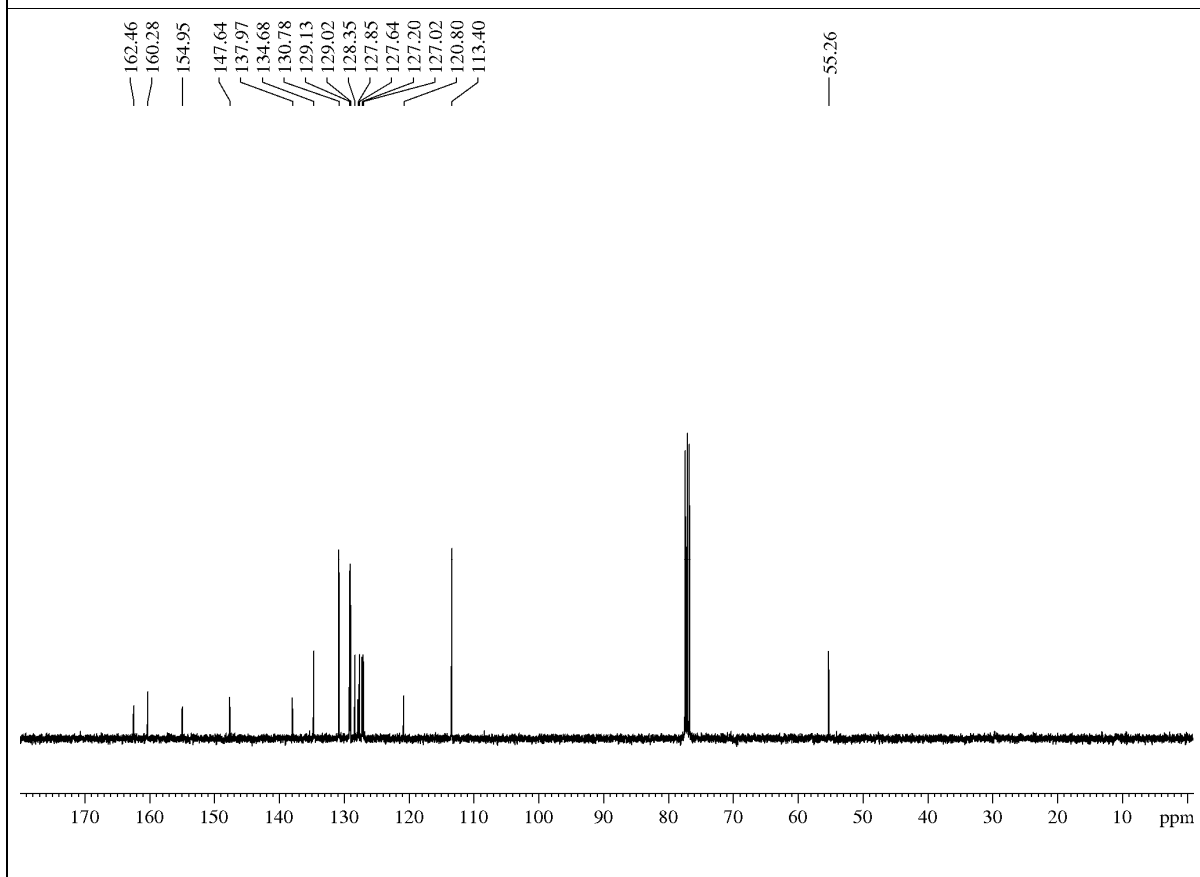

LCMS-2010A DATA REPORT  
SCHOOL OF CHEMISTRY  
UNIVERSITY OF HYDERABAD

User : Admin  
Sample : SKG-673  
Inj. Volume : 5.000  
Data Name : C:\LCMSsolution\User\Data\SKG-673-APCI-POS1.qld  
Method Name : C:\LCMSsolution\User\Method\esi.qlm

MS Spectrum

Line#: 1 R.Time: 0.831(Scan#: 50) Positive  
MassPeaks: 154 BasePeak: 329.35(5409029)  
RawMode: Single 0.831(50)  
BG Mode: Peak Start 0.677(41)

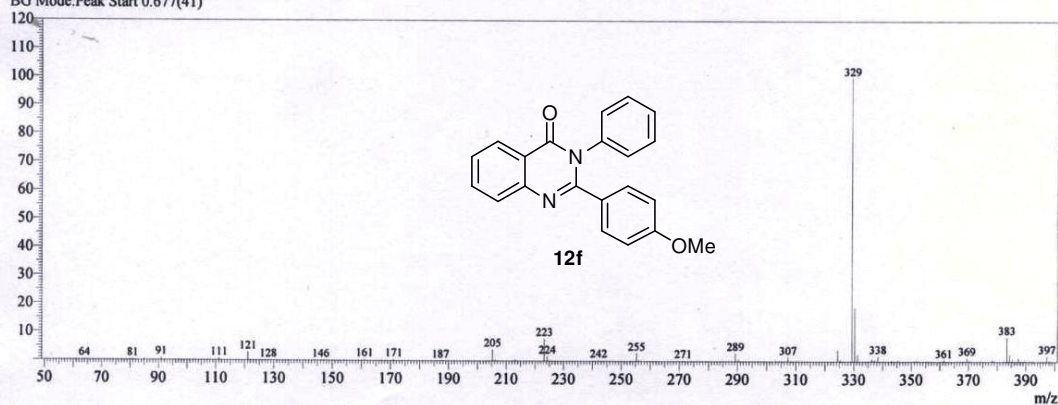

MS Peak Table

| Peak# | R.Time | I.Time | F.Time | Area     | Height  | A/H   | Mark | %Total | Name | Base m/z | Base Int. |
|-------|--------|--------|--------|----------|---------|-------|------|--------|------|----------|-----------|
| 1     | 0.831  | 0.677  | 1.043  | 82279782 | 7660294 | 10.74 |      | 100.00 |      | 329.35   | 5409029   |
|       |        |        |        | 82279782 | 7660294 |       |      | 100.00 |      |          |           |



**FLASH EA 1112 SERIES CHN REPORT**  
**SCHOOL OF CHEMISTRY**  
**UNIVERSITY OF HYDERABAD**

Method filename: C:\Program Files\Thermo Finnigan\Eager 300 for EA1112\DATA\Sys\_data\_ex  
 Sample ID: SKG-673 (# 151)  
 Analysis type: UnkNown  
 Chromatogram filename: UNK-18022015-11.dat  
 Sample weight: 1512

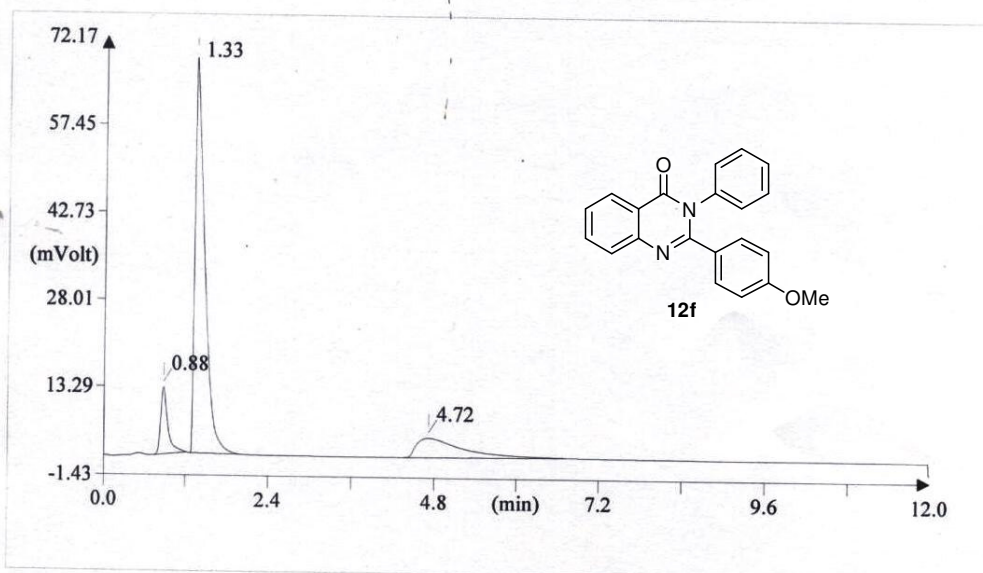

| Element Name | Element % | Ret. Time |
|--------------|-----------|-----------|
| Nitrogen     | 8.45      | 0.88      |
| Carbon       | 76.95     | 1.33      |
| Hydrogen     | 5.07      | 4.72      |
